# Supplementary material for: Bifunctional iminophosphorane catalysed enantioselective sulfa-Michael addition of alkyl thiols to alkenyl benzimidazoles
Source: PubMed Central journal article supplement (PMC6124915; doi:10.1039/c8sc01804a), 2018-07-23
Supplement: SC-009-C8SC01804A-s001.pdf [file SC-009-C8SC01804A-s001.pdf]

## Supporting Information

### **Bifunctional Iminophosphorane Catalyzed Enantioselective Sulfa-Michael Addition of Alkyl Thiols to Alkenyl Benzimidazoles**

Michele Formica<sup>†[a]</sup>, Geoffroy Sorin<sup>†[a,b]</sup>, Alistair J. M. Farley<sup>[a]</sup>, Jesús Díaz<sup>[c]</sup> Robert S. Paton<sup>[d]\*</sup> and Darren J Dixon<sup>[a]\*</sup>

**Abstract:** The first enantioselective sulfa-Michael addition of alkyl thiols to alkenyl benzimidazoles, enabled by a bifunctional iminophosphorane (BIMP) organocatalyst, is described. The iminophosphorane moiety of the catalyst provides the required basicity to deprotonate the thiol nucleophile while the chiral scaffold and H-bond donor control facial selectivity. The reaction is broad in scope with respect to the thiol and benzimidazole reaction partners with the reaction proceeding in up to 98% yield and 96:4 er.

<sup>[a]</sup> **M. Formica, Dr. G. Sorin, Dr. A. J. M. Farley, Prof. Dr. D. J. Dixon**

Department of Chemistry, Chemistry Research Laboratory  
University of Oxford  
Mansfield Road, Oxford OX1 3TA (UK)  
E-mail: darren.dixon@chem.ox.ac.uk

<sup>[b]</sup> **Dr. G. Sorin**

Faculté des Sciences Pharmaceutiques et Biologiques  
Unité CNRS UMR 8638 COMETE  
Paris Descartes University, Sorbonne Paris Cité  
4 avenue de l'observatoire, 75270 Paris cedex 06 (France)

<sup>†</sup> Authors contributed equally to this work

<sup>[c]</sup> **Dr. J. Díaz**

Departamento de Química Orgánica,  
Universidad de Extremadura, Avda.  
Universidad, s/n, 10003 Cáceres (Spain)

<sup>[d]</sup> **Prof. Dr. R. S. Paton**

Department of Chemistry  
Colorado State University  
Fort Collins, Colorado 80523 (USA)

## Contents

|                                                                       |     |
|-----------------------------------------------------------------------|-----|
| 1/ General Information .....                                          | 3   |
| 2/ Reaction Optimization .....                                        | 4   |
| 3/ Control Experiments .....                                          | 6   |
| 4/ Synthesis of precatalysts and catalysts.....                       | 7   |
| 5/ Preparations of <i>N</i> -Ts protected alkenyl benzimidazole ..... | 7   |
| 6/ General Procedures: .....                                          | 14  |
| 7/ Cleavage of <i>N</i> -Ts group (25).....                           | 27  |
| 8/ Oxidation of sulfur (26) .....                                     | 28  |
| 9/ Removal of <i>para</i> -Methoxybenzyl group (27) .....             | 29  |
| 10/ Introduction of a 4-Me group (29) .....                           | 30  |
| 11/ <sup>1</sup> H and <sup>13</sup> C NMR spectra .....              | 32  |
| 12/ HPLC traces .....                                                 | 72  |
| 13/ Single Crystal X-Ray Diffraction Data .....                       | 97  |
| 14/ Computational Methods .....                                       | 101 |

## 1/ General Information

Reactions were carried out under a nitrogen atmosphere in oven-dried glassware at room temperature (22 °C) unless stated otherwise. Standard inert atmosphere techniques were used in handling all air and moisture sensitive reagents. Thin-layer chromatography (TLC) was performed using Merck aluminium backed sheets coated with Merck Kieselgel 60 F254 (230-400 mesh) fluorescent treated silica, which were visualised under UV light ( $\lambda_{\text{max}} = 254$  or 365 nm). Flash column chromatography was performed using Merck Kieselgel (230-400 mesh). All  $^1\text{H}$ ,  $^{13}\text{C}$  and  $^{19}\text{F}$  NMR spectra were recorded using a Bruker 500 MHz and Bruker 400 MHz spectrometers and are quoted in ppm for measurement against a tetramethylsilane (TMS) or residual solvent peak internal standard. Coupling constants (J) are reported in hertz (Hz). Two-dimensional spectroscopy (COSY, HSQC and HMBC) was used to assist in the assignment and the data is not reported. IR spectra were recorded on a Bruker Tensor 27 FT-IR spectrometer deposited as a thin film. Melting points were recorded using a Leica Galen III hot-stage microscope apparatus and are reported uncorrected in degrees Celsius (°C). Low resolution mass spectra were recorded on a Waters LCT premier XE Micromass spectrometer (ESI). High resolution mass spectra (ESI) were recorded on a Bruker MicroTof mass spectrometer. Optical rotations were recorded using a Perkin Elmer 341 polarimeter;  $[\alpha]_{\text{D}}^T$  values are reported in  $10^{-1} \text{ deg}\cdot\text{cm}^2 \text{ g}^{-1}$ ; concentrations (c) are quoted in g/100 mL; D refers to the D-line of sodium (589 nm); temperatures (T) are given in degrees Celsius (°C). (+) and (–) compound number prefixes indicate the sign of the optical rotation. The enantiomeric excesses were determined by HPLC analysis on an Agilent 1200 Series instrument employing a chiral stationary phase column specified in the individual experiment and by comparing the samples with the appropriate racemic mixtures. Concentration under reduced pressure was performed by rotary evaporation at the appropriate pressure and temperature. Reagents used were obtained from commercial suppliers or purified according to standard procedures. Petroleum ether refers to distilled light petroleum of fraction 30 - 40 °C. Anhydrous toluene, tetrahydrofuran, dichloromethane and diethyl ether were dried by filtration through activated alumina (powder ~150 mesh, pore size 58 Å, basic, Sigma-Aldrich) columns. Dimethyl sulfoxide and dimethylformamide were used as supplied. Deuterated solvents were used as supplied.

## 2/ Reaction Optimization

**Table S1:** Catalyst Screen

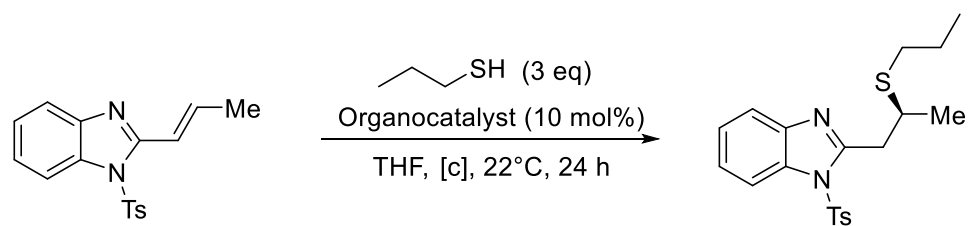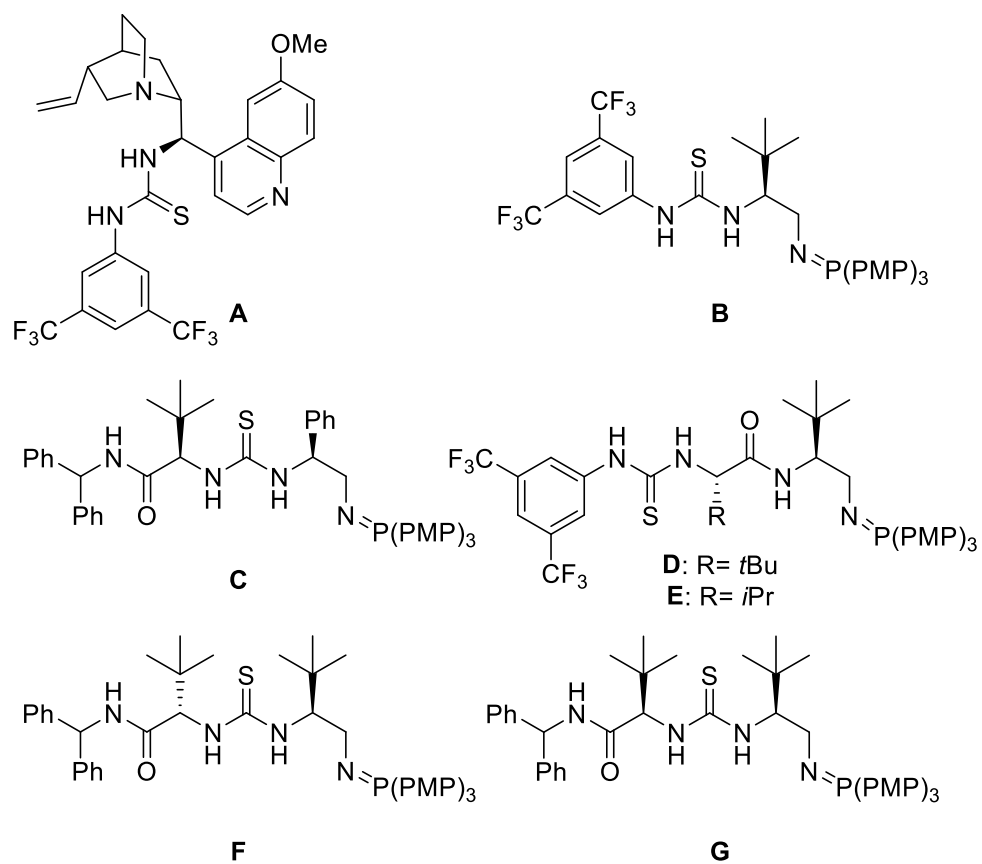

| Entry | Catalyst | [c] Mol/L <sup>-1</sup> | Yield % | e.r   |
|-------|----------|-------------------------|---------|-------|
| 1     | A        | 0.50                    | 12      | 53:47 |
| 2     | B        | 0.50                    | 80      | 83:17 |
| 3     | C        | 0.25                    | 92      | 86:14 |
| 4     | D        | 0.50                    | 83      | 66:34 |
| 5     | E        | 0.50                    | 95      | 83:17 |
| 6     | F        | 0.50                    | 90      | 90:10 |
| 7     | G        | 0.06                    | 90      | 93:7  |

**Table S2:** Solvent and Condition optimisation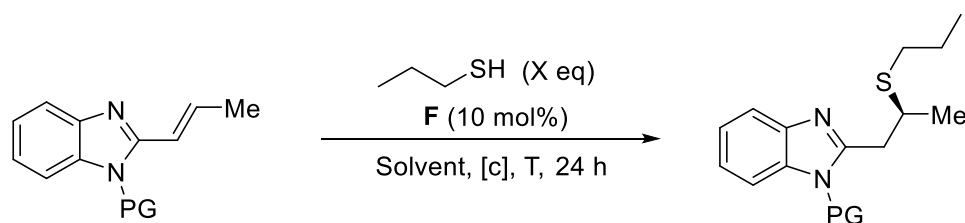

| Entry                   | Protecting Group | Solvent                         | Thiol equiv. | [c] Mol/L <sup>-1</sup> | Temp. (°C) | Yield %   | e.r         |
|-------------------------|------------------|---------------------------------|--------------|-------------------------|------------|-----------|-------------|
| 1                       | Ts               | THF                             | 3.0          | 0.50                    | 22         | 90        | 90/10       |
| 2                       | Ts               | THF                             | 3.0          | 0.25                    | 22         | 86        | 91/9        |
| 3                       | Ts               | THF                             | 3.0          | 0.125                   | 22         | 86        | 90/10       |
| 4                       | Ts               | THF                             | 3.0          | 0.50                    | 12         | 83        | 90/10       |
| 5                       | Ts               | THF                             | 3.0          | 0.50                    | -15        | 93        | 92/8        |
| 6                       | Ts               | THF                             | 3.0          | 0.50                    | -40        | 88        | 82/18       |
| 7                       | Ts               | TBME                            | 3.0          | 0.50                    | 22         | 80        | 91/9        |
| 8                       | Ts               | 2-MeTHF                         | 3.0          | 0.50                    | 22         | 80        | 91/9        |
| 9                       | Ts               | 1,4-dioxane                     | 3.0          | 0.50                    | 22         | 79        | 89/11       |
| 10                      | Ts               | CH <sub>2</sub> Cl <sub>2</sub> | 3.0          | 0.50                    | 22         | 70        | 91/9        |
| 11                      | Ts               | MeCN                            | 3.0          | 0.50                    | 22         | 81        | 73/27       |
| 12                      | Ts               | Toluene                         | 3.0          | 0.50                    | 22         | 92        | 89/11       |
| 13                      | Ts               | 2-MeTHF                         | 3.0          | 0.06                    | 22         | 55        | 91/9        |
| 14                      | Ts               | Et <sub>2</sub> O               | 3.0          | 0.06                    | 22         | 92        | 93/7        |
| 15                      | Ts               | Et <sub>2</sub> O               | 2.0          | 0.25                    | 22         | 92        | 91/9        |
| 16                      | Ts               | Et <sub>2</sub> O               | 1.2          | 0.25                    | 22         | 94        | 92/8        |
| 17                      | Ts               | 2-MeTHF                         | 3.0          | 0.50                    | 0          | 85        | 91/9        |
| 18                      | Ts               | TBME                            | 3.0          | 0.50                    | 0          | 92        | 92/8        |
| 19                      | Ts               | THF                             | 0.5          | 0.50                    | 22         | 86        | 90/10       |
|                         |                  |                                 | then         |                         |            |           |             |
|                         |                  |                                 | 0.7          |                         |            |           |             |
| <b>20</b>               | <b>Ts</b>        | <b>Et<sub>2</sub>O</b>          | <b>1.2</b>   | <b>0.06</b>             | <b>0</b>   | <b>93</b> | <b>94/6</b> |
| 21                      | Boc              | THF                             | 3.0          | 0.50                    | 22         | 84        | 91/9        |
| 22                      | Boc              | TBME                            | 3.0          | 0.50                    | 22         | 90        | 90/10       |
| <b>23<sup>[a]</sup></b> | <b>Ts</b>        | <b>Et<sub>2</sub>O</b>          | <b>1.2</b>   | <b>0.06</b>             | <b>22</b>  | <b>98</b> | <b>95/5</b> |

<sup>[a]</sup>Performed using catalyst **G**. All reactions performed on 0.1 mmol scale.

### 3/ Control Experiments

**Table S3:** Control Experiments

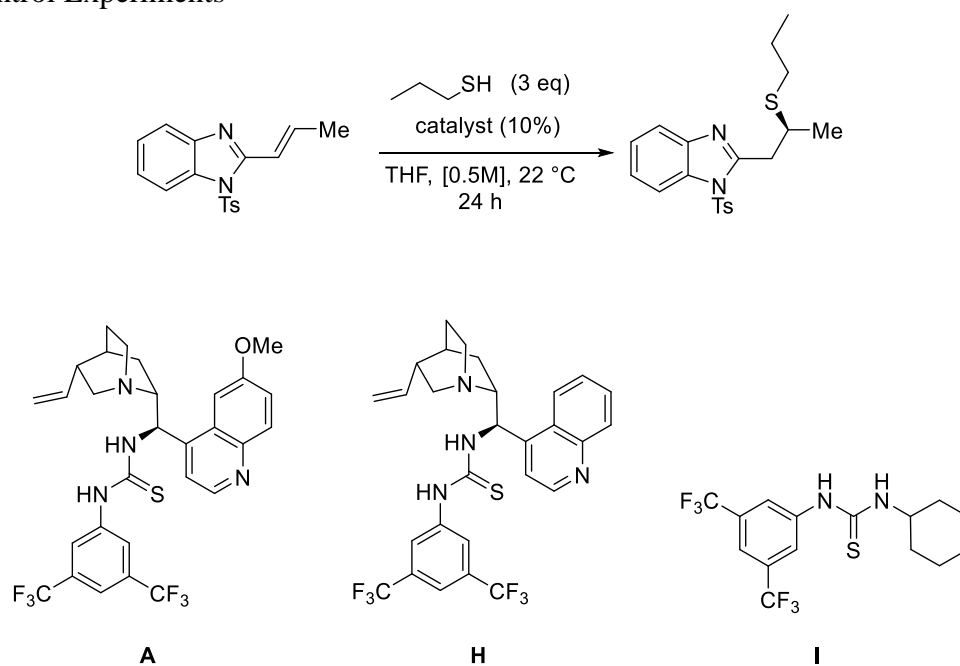

| Entry          | Catalyst                                        | Yield | er       |
|----------------|-------------------------------------------------|-------|----------|
| 1              | None                                            | 24 %  | N/A      |
| 2              | <b>A</b>                                        | 12 %  | 53/47    |
| 3              | <b>H</b>                                        | 6 %   | 52/48    |
| 4              | None (Basified Thiol) <sup>a</sup>              | 12%   | N/A      |
| 5              | Et <sub>3</sub> N (Basified Thiol) <sup>a</sup> | trace | N/A      |
| 6              | Benzoic Acid (Basified Thiol) <sup>a</sup>      | 89%   | N/A      |
| 7              | <b>A</b> (Basified Thiol) <sup>a</sup>          | 12 %  | 52/48    |
| 8              | <b>I</b> (Basified Thiol) <sup>a</sup>          | 33 %  | N/A      |
| 9 <sup>b</sup> | <b>G</b> (Basified Thiol) <sup>a</sup>          | 87%   | 94.5/5.5 |

<sup>a</sup>Thiol was basified by allowing it to stand over K<sub>2</sub>CO<sub>3</sub> for 24 h. <sup>b</sup> Reaction performed in Et<sub>2</sub>O at 0°C using 1.2 eq of 1-propane thiol.

## Experimental Procedures

### 4/ Synthesis of precatalysts and catalysts

Catalysts **A**,<sup>1</sup> **B**,<sup>2</sup> **C** and **F-G**,<sup>3</sup> **D-E**,<sup>4</sup> **H**,<sup>5</sup> **I**<sup>6</sup> were prepared according to literature procedures.

### 5/ Preparations of *N*-Ts protected alkenyl benzimidazole

Non commercially available aldehydes were prepared by simple oxidation of the corresponding alcohol with Dess-Martin Periodinane following the procedure reported by Snowden *et al.*<sup>7</sup>

*tert*-butyl-2-((diethoxyphosphoryl)methyl)-1*H*-benzo[*d*]imidazole-1-carboxylate (**Bz0**), *N*-Ts benzimidazoles **1**, **Bz1**, **Bz2**, *N*-Boc- and *N*-Cbz benzimidazoles **Bz3** and **Bz4** were prepared as described by Terada *et al.*<sup>8</sup>

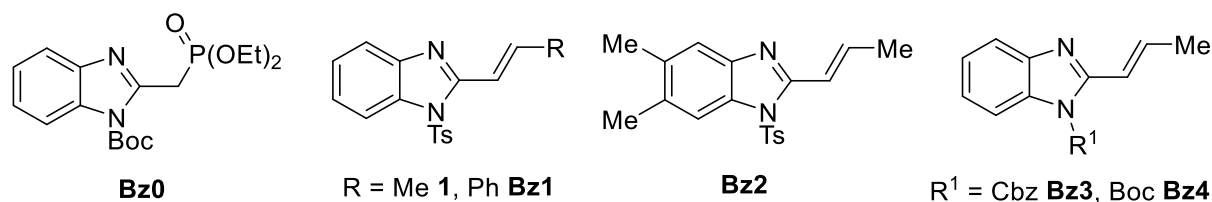

### Synthesis of (*E*)-6-bromo-2-(prop-1-en-1-yl)-1-tosyl-1*H*-benzo[*d*]imidazole and (*E*)-5-bromo-2-(prop-1-en-1-yl)-1-tosyl-1*H*-benzo[*d*]imidazole

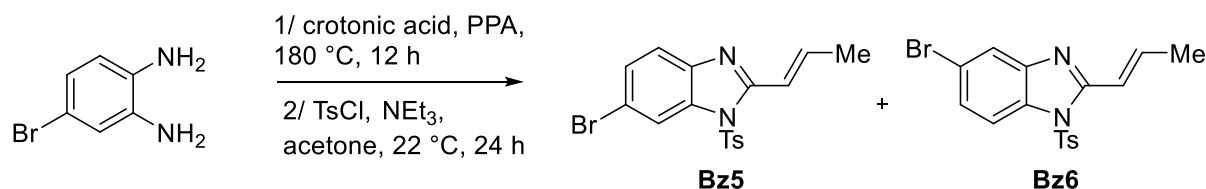

To a mixture of crotonic acid (2.68 g, 30 mmol) in polyphosphoric acid (12 g) was added 4-bromo-1,2-diaminobenzene (5.61 g, 30 mmol). The reaction was heated at 180 °C for 12 h. The mixture was cooled down to 22 °C and poured carefully onto a saturated solution of NaHCO<sub>3</sub>. Solid NaHCO<sub>3</sub> was added until neutral pH was obtained. The solution was diluted with EtOAc and water then stirred vigorously for 10 min. The aqueous phase was extracted twice with EtOAc and the combined organic phase were washed with brine, dried over MgSO<sub>4</sub> and concentrated under vacuum affording 3.9 g of purple solid.

The crude residue (2.0 g, 8.4 mmol) was dissolved in acetone (40 mL), NEt<sub>3</sub> (1.41 mL, 10.1 mmol) was added then TsCl (1.77 g, 9.3 mmol). The mixture was stirred for 24h at 22 °C. The solvent was removed

<sup>1</sup> B. Vakulya, S. Varga, A. Csámpai and T. Soós, *Org. Lett.*, 2005, **7**, 1967.

<sup>2</sup> M. G. Núñez, A. J. M. Farley and D. J. Dixon, *J. Am. Chem. Soc.*, 2013, **135**, 16348.

<sup>3</sup> J. Yang, A. J. M. Farley and D. J. Dixon, *Chem. Sci.*, 2017, **8**, 606.

<sup>4</sup> G. P. Robertson, A. J. M. Farley and D. J. Dixon, *Synlett*, 2016, **27**, 21.

<sup>5</sup> J. Ye, D. J. Dixon and P. S. Hynes, *Chem. Commun.*, 2005, **0**, 4481.

<sup>6</sup> Y. Okino, Y. Hoashi, T. Furukawa and X. Xu, Y. Takemoto, *J. Am. Chem. Soc.*, 2005, **127**, 119.

<sup>7</sup> M. K. Gupta, Z. Li and T. S. Snowden *J. Org. Chem.*, 2012, **77**, 4854.

<sup>8</sup> Y.-Y. Wang, K. Kanomata, T. Korenaga and M. Terada *Angew. Chem. Int. Ed.*, 2016, **55**, 927.

under vacuum and the crude was purified by flash chromatography on silica gel (pentane 9/ EtOAc 1). A subsequent trituration of each compound in a mixture of pentane/ Et<sub>2</sub>O (1/1) afford pure (*E*)-6-bromo-2-(prop-1-en-1-yl)-1-tosyl-1*H*-benzo[*d*]imidazole (**Bz5**) as a white solid (m = 0.38 g, 12 %) and (*E*)-5-bromo-2-(prop-1-en-1-yl)-1-tosyl-1*H*-benzo[*d*]imidazole (**Bz6**) as an off-white solid (m= 0.45 g, 14%).

(*E*)-6-Bromo-2-(prop-1-en-1-yl)-1-tosyl-1*H*-benzo[*d*]imidazole (**Bz5**)

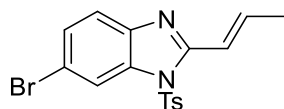

**Mp** : 160°C (from EtOAc/Petrol); **<sup>1</sup>H NMR** (400 MHz, CDCl<sub>3</sub>) δ 8.24 (d, *J* = 1.8 Hz, 1H), 7.78 (d, *J* = 8.5 Hz, 2H), 7.50 (d, *J* = 8.5 Hz, 1H), 7.44 (dd, *J* = 8.5, 1.8 Hz, 1H), 7.30 (d, *J* = 7.8 Hz, 2H), 7.20 – 7.14 (m, 1H), 7.10 (dq, *J* = 15.3, 6.2 Hz, 1H), 2.40 (s, 3H), 2.05 (d, *J* = 5.2 Hz, 3H); **<sup>13</sup>C NMR** (101 MHz, CDCl<sub>3</sub>) δ 151.6, 146.3, 141.6, 140.4, 135.2, 133.9, 130.4, 128.5, 127.0, 120.9, 118.2, 118.1, 117.0, 77.5, 77.2, 76.8, 21.8, 19.3; **IR** (film)  $\nu_{\max}/\text{cm}^{-1}$ : 1642, 1597, 1423, 1378, 1166, 1039, 812, 710, 666; **HRMS** (ESI+): calcd. for C<sub>17</sub>H<sub>16</sub>O<sub>2</sub>N<sub>2</sub>BrS [M+H]<sup>+</sup> 391.0109 and 393.0089, found 391.0113 and 393.0091.

(*E*)-5-Bromo-2-(prop-1-en-1-yl)-1-tosyl-1*H*-benzo[*d*]imidazole (**Bz6**)

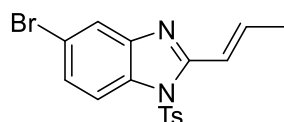

**Mp** : 128°C (from EtOAc/Petrol); **<sup>1</sup>H NMR** (400 MHz, CDCl<sub>3</sub>) δ 7.90 (d, *J* = 8.8 Hz, 1H), 7.77 – 7.70 (m, 3H), 7.41 (dd, *J* = 8.8, 1.9 Hz, 1H), 7.29 – 7.22 (m, 2H), 7.21 – 7.12 (m, 1H), 7.09 (dq, *J* = 15.3, 5.3 Hz, 2H), 2.37 (s, 3H), 2.04 (d, *J* = 5.3 Hz, 3H); **<sup>13</sup>C NMR** (101 MHz, CDCl<sub>3</sub>) δ 152.2, 146.7, 143.9, 140.8, 135.7, 132.0, 130.3, 127.8, 126.9, 122.7, 118.2, 118.2, 115.7, 77.5, 77.7, 76.8, 21.8, 19.3; **IR** (film)  $\nu_{\max}/\text{cm}^{-1}$ : 1644, 1596, 1446, 1379, 1166, 1048, 809, 732, 665; **HRMS** (ESI+): calcd. for C<sub>17</sub>H<sub>16</sub>O<sub>2</sub>N<sub>2</sub>BrS [M+H]<sup>+</sup> 391.0109 and 393.0089, found 391.0110 and 393.0089.



Other *N*-Ts benzimidazoles Michael acceptors were prepared according the sequence reported below:

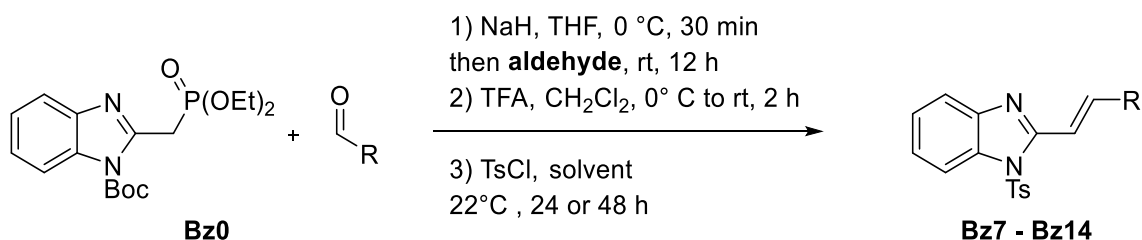

### General procedure I for the synthesis of *N*-Ts precursors (GP I):

To a solution of *N*-Boc protected benzimidazole **Bz0** (368 mg, 1.0 mmol) in dry THF (12 mL) at 0°C was added portionwise NaH 60% (w/w in oil) (64 mg, 1.6 mmol) and stirred under N<sub>2</sub> at 0 °C for 30 min. The corresponding aldehyde (2.0 mmol) was added at 0 °C then the reaction was allowed to warm to 22 °C and stirred for 12 h. The mixture was quenched by adding water and the aqueous phase was extracted with EtOAc. The combined organic phase were washed with brine, dried over MgSO<sub>4</sub> and concentrated under reduced pressure.

The residue was taken in dry CH<sub>2</sub>Cl<sub>2</sub> (1 mL/ 1mmol) and cooled to 0°C. TFA (1mL/ 1 mmol) was added and the reaction was stirred at 22 °C until TLC shows complete disappearance of the starting material. The mixture was quenched by adding a saturated solution of NaHCO<sub>3</sub>. The aqueous layer was extracted with EtOAc. The combined organic phase were washed with brine, dried over MgSO<sub>4</sub> and concentrated under reduced pressure.

The crude was dissolved in CH<sub>2</sub>Cl<sub>2</sub>, acetone or DMF (5 mL/1 mmol), then NEt<sub>3</sub> (2.0 eq) and TsCl (1.2 eq) was added. The mixture was stirred over 48h at 22 °C then volatiles were removed under vacuum. The resulting residue was submitted to a flash chromatography on silica gel or triturated to give the pure product.

#### (*E*)-2-(Hex-1-en1-yl)-1-tosyl-1*H*-benzo[*d*]imidazole (**Bz7**)

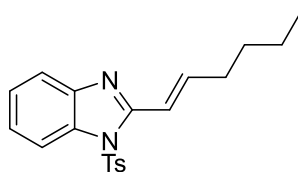

(*E*)-2-(Hex-1-en1-yl)-1-tosyl-1*H*-benzo[*d*]imidazole was synthesized following **GP I** using hexanal (200.3 mg, 2.0 mmol, 246 μL) as the aldehyde. Acetone was used as a solvent for the *N*-tosylation. Purification by flash chromatography on silica gel (8 pentane/2 Et<sub>2</sub>O) afforded pure **Bz7** as a colourless oil. (156 mg, 0.440 mmol, 50% overall yield).

<sup>1</sup>H NMR (400 MHz, CDCl<sub>3</sub>) δ = 8.10 – 8.01 (m, 1H), 7.76 (d, *J* = 8.0 Hz, 2H), 7.67 – 7.59 (m, 1H), 7.36 – 7.28 (m, 2H), 7.24 (d, *J* = 8.0 Hz, 3H), 7.18 (dt, *J* = 15.5, 1.3 Hz, 1H), 7.07 (dt, *J* = 15.5, 6.9 Hz, 1H), 2.40 – 2.32 (m, 5H), 1.58 – 1.48 (m, 2H), 1.47 – 1.34 (m, 2H), 0.95 (t, *J* = 7.3 Hz, 3H); <sup>13</sup>C NMR (101 MHz, CDCl<sub>3</sub>) δ = 151.3, 145.9, 144.8, 142.6, 135.6, 133.1, 130.2, 127.0, 125.1, 124.9, 119.9, 117.3, 114.0, 33.2, 30.8, 22.4, 21.8, 14.1; IR (film) ν<sub>max</sub>/cm<sup>-1</sup>: 2957, 2928, 1640, 1448, 1377, 1169, 1120, 1089, 743, 670; HRMS (ESI<sup>+</sup>): calcd. for C<sub>20</sub>H<sub>23</sub>O<sub>2</sub>N<sub>2</sub>S [M+H]<sup>+</sup> 355.1474, found 355.1473.

(E)-2-(4-Phenylbut-1-en-1-yl)-1-tosyl-1H-benzo[d]imidazole (**Bz8**)

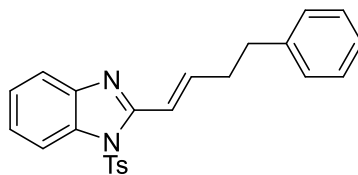

(*E*)-2-(4-Phenylbut-1-en-1-yl)-1-tosyl-1*H*-benzo[*d*]imidazole was synthesized following **GP I** using 3-phenylpropanal (268.3 mg, 2.0 mmol, 263  $\mu$ L) as the aldehyde. DMF was used as a solvent for the tosylation. Purification by flash chromatography on silica gel (9 pentane/1 EtOAc) afforded pure **Bz8** as a yellow solid. (130 mg, 0.322 mmol, 30% overall yield).

**Mp** : 90°C (from EtOAc/Petrol); **<sup>1</sup>H NMR** (400 MHz, CDCl<sub>3</sub>)  $\delta$  = 8.10 – 7.98 (m, 1H), 7.68 (d, *J* = 8.5 Hz, 2H), 7.65 – 7.62 (m, 1H), 7.36 – 7.30 (m, 3H), 7.28 – 7.24 (m, 3H), 7.23 – 7.19 (m, 3H), 7.14 (dt, *J* = 15.5, 6.5 Hz, 1H), 2.89 (dd, *J* = 8.8, 6.5 Hz, 2H), 2.75 – 2.68 (m, 2H), 2.36 (s, 3H); **<sup>13</sup>C NMR** (101 MHz, CDCl<sub>3</sub>)  $\delta$  151.0, 145.9, 143.3, 142.6, 141.1, 135.4, 133.0, 130.2, 128.6, 128.6, 126.9, 126.2, 125.16, 125.0, 119.9, 117.9, 114.0, 77.5, 77.2, 76.8, 34.9, 34.9, 21.8; **IR** (film)  $\nu_{\text{max}}/\text{cm}^{-1}$ : 3026, 2923, 1641, 1597, 1449, 1377, 1173, 1049, 743, 670; **HRMS** (ESI<sup>+</sup>): calcd. for C<sub>24</sub>H<sub>23</sub>O<sub>2</sub>N<sub>2</sub>S [M+H]<sup>+</sup> 403.1474, found 403.1476.

(E)-2-(Hepta-1,6-dien-1-yl)-1-tosyl-1H-benzo[d]imidazole (**Bz9**)

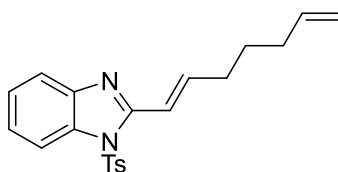

(*E*)-2-(Hepta-1,6-dien-1-yl)-1-tosyl-1*H*-benzo[*d*]imidazole was synthesized following **GP I** hex-5-enal (196.3 mg, 2.0 mmol) as the aldehyde. CH<sub>2</sub>Cl<sub>2</sub> was used as a solvent for the *N*-tosylation. Purification by flash chromatography on silica gel (9 pentane/1 EtOAc) afforded pure **Bz9** as a colourless oil. (310 mg, 0.846 mmol, 44% overall yield).

**<sup>1</sup>H NMR** (400 MHz, CDCl<sub>3</sub>)  $\delta$  8.08 – 8.03 (m, 1H), 7.76 (d, *J* = 8.4 Hz, 2H), 7.70 – 7.58 (m, 1H), 7.39 – 7.29 (m, 2H), 7.25 (d, *J* = 0.8 Hz, 2H), 7.20 (dt, *J* = 15.4, 1.4 Hz, 1H), 7.07 (dt, *J* = 15.5, 6.9 Hz, 1H), 5.84 (ddt, *J* = 16.9, 10.2, 6.7 Hz, 1H), 5.12 – 4.97 (m, 2H), 2.45 – 2.38 (m, 1H), 2.36 (s, 3H), 2.22 – 2.05 (m, 2H), 1.65 (p, *J* = 7.4 Hz, 3H); **<sup>13</sup>C NMR** (101 MHz, CDCl<sub>3</sub>)  $\delta$  151.2, 146.0, 144.3, 142.6, 138.3, 135.5, 133.1, 130.2, 126.9, 125.2, 124.9, 119.9, 117.6, 115.2, 114.0, 33.4, 32.8, 27.9, 21.8; **IR** (film)  $\nu_{\text{max}}/\text{cm}^{-1}$ : 3076, 2927, 1640, 1448, 1378, 1171, 1049, 919, 744, 670; **HRMS** (ESI<sup>+</sup>): calcd. for C<sub>21</sub>H<sub>23</sub>O<sub>2</sub>N<sub>2</sub>S [M+H]<sup>+</sup> 367.1477, found 367.1474.

(E)-2-(Hex-1-en-5-yn-1-yl)-1-tosyl-1H-benzo[d]imidazole (**Bz10**)

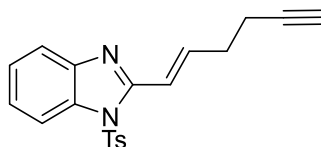

(E)-2-(Hex-1-en-5-yn-1-yl)-1-tosyl-1H-benzo[d]imidazole was synthesized following **GP I** using pent-4-ynal (164.2 mg, 2.0 mmol) as the aldehyde. CH<sub>2</sub>Cl<sub>2</sub> was used as a solvent for the tosylation. Purification by flash chromatography on silica gel (8 pentane/2 EtOAc) afforded pure **Bz10** as a white solid. (170 mg, 0.485 mmol, 26% overall yield).

**Mp** : 104°C (from EtOAc/Petrol); **<sup>1</sup>H NMR** (400 MHz, CDCl<sub>3</sub>) δ = 8.07 – 8.01 (m, 1H), 7.78 (d, *J* = 8.5 Hz, 2H), 7.67 – 7.60 (m, 1H), 7.35 – 7.27 (m, 3H), 7.23 (d, *J* = 8.5 Hz, 2H), 7.09 (dt, *J* = 15.5, 6.7 Hz, 1H), 2.59 (brq, *J* = 6.7 Hz, 2H), 2.44 (td, *J* = 7.1, 2.6 Hz, 2H), 2.34 (s, 3H), 2.03 (t, *J* = 2.6 Hz, 1H); **<sup>13</sup>C NMR** (101 MHz, CDCl<sub>3</sub>) δ 150.7, 146.0, 142.5, 141.5, 135.4, 133.0, 130.2, 127.0, 126.9, 125.2, 125.1, 112.0, 118.6, 114.0, 83.2, 77.5, 77.2, 76.8, 69.5, 32.2, 21.7, 18.1; **IR** (film) ν<sub>max</sub>/cm<sup>-1</sup>: 3295, 2920, 1644, 1596, 1448, 1377, 1175, 1049, 744, 669; **HRMS** (ESI+): calcd. for C<sub>20</sub>H<sub>19</sub>O<sub>2</sub>N<sub>2</sub>S [M+H]<sup>+</sup> 351.1168, found 351.1159.

(E)-2-(4-Chlorostyryl)-1-tosyl-1H-benzo[d]imidazole (**Bz11**)

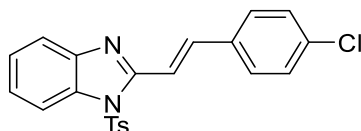

(E)-2-(4-Chlorostyryl)-1-tosyl-1H-benzo[d]imidazole was synthesized following **GP I** using 0.68 mmol (250 mg) of *N*-boc protected benzimidazole phosphonate and 4-chlorobenzaldehyde (127.9 mg, 0.91 mmol) as the aldehyde. CH<sub>2</sub>Cl<sub>2</sub>:Et<sub>3</sub>N 1:1 was used as a solvent for the *N*-tosylation. Purification by flash chromatography on silica gel (pentane to 4 pentane/1 EtOAc) afforded pure **Bz11** as an off-white powder. (168 mg, 0.411 mmol, 61% overall yield).

**Mp** : 168 °C (from EtOAc/Petrol); **<sup>1</sup>H NMR** (400 MHz, CDCl<sub>3</sub>) δ 8.12 – 8.02 (m, 1H), 7.90 (d, *J* = 4.5 Hz, 2H), 7.82 – 7.77 (m, 2H), 7.75 – 7.69 (m, 1H), 7.64 – 7.58 (m, 2H), 7.47 – 7.41 (m, 2H), 7.40 – 7.36 (m, 2H), 7.25 (d, *J* = 8.1 Hz, 2H), 2.37 (s, 3H); **<sup>13</sup>C NMR** (101 MHz, CDCl<sub>3</sub>) δ 150.9, 146.1, 142.8, 138.4, 135.5, 135.4, 134.4, 133.3, 130.3, 129.4, 129.0, 126.9, 125.5, 125.3, 120.1, 115.1, 114.1, 21.8; **IR** (film) ν<sub>max</sub>/cm<sup>-1</sup>: 3057, 1512, 1490, 1447, 1378, 1344, 1200, 1185, 1168, 1150, 1090, 1051, 1013, 812, 764, 744, 677, 665, 645; **HRMS** (ESI+): calcd. for C<sub>22</sub>H<sub>18</sub>O<sub>2</sub>N<sub>2</sub>ClS [M+H]<sup>+</sup> 409.0772, found 409.0770.

(E)-2-(4-Nitrostyryl)-1-tosyl-1H-benzo[d]imidazole (Bz12)

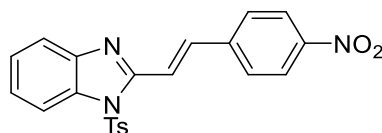

(E)-2-(4-Nitrostyryl)-1-tosyl-1H-benzo[d]imidazole was synthesized following **GP I** using 0.60 mmol (220 mg) of *N*-*boc* protected benzimidazole phosphonate using 4-nitrobenzaldehyde (120.9 mg, 0.8 mmol) as the aldehyde. CH<sub>2</sub>Cl<sub>2</sub>:Et<sub>3</sub>N 1:1 was used as solvent for the *N*-tosylation. Purification by flash chromatography on silica gel (9 pentane/1 EtOAc to 7 pentane/3 EtOAc) afforded pure **Bz12** as a yellow powder. (100 mg, 0.238 mmol, 35% overall yield).

**Mp** : 194 °C (from EtOAc/Petrol); **<sup>1</sup>H NMR** (400 MHz, CDCl<sub>3</sub>) δ 8.36 – 8.25 (m, 2H), 8.15 – 8.07 (m, 2H), 7.98 (d, *J* = 15.9 Hz, 1H), 7.83 – 7.77 (m, 4H), 7.77 – 7.70 (m, 1H), 7.49 – 7.35 (m, 2H), 7.27 (d, *J* = 7.3 Hz, 2H), 2.38 (s, 3H); **<sup>13</sup>C NMR** (101 MHz, CDCl<sub>3</sub>) δ 150.0, 148.1, 146.4, 142.7, 142.1, 136.8, 135.3, 133.3, 130.4, 128.3, 126.9, 125.9, 125.7, 124.5, 120.4, 118.9, 114.1, 21.8; **IR** (film) ν<sub>max</sub>/cm<sup>-1</sup>: 3078, 1597, 1520, 1377, 1344, 1171, 748, 670; **HRMS** (ESI<sup>+</sup>): calcd. for C<sub>22</sub>H<sub>18</sub>O<sub>4</sub>N<sub>3</sub>S [M+H]<sup>+</sup> 420.1009, found 420.1012.

(E)-2-(3-Chlorostyryl)-1-tosyl-1H-benzo[d]imidazole (Bz13)

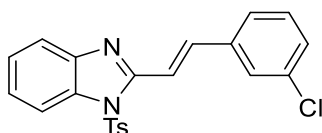

(E)-2-(3-Chlorostyryl)-1-tosyl-1H-benzo[d]imidazole was synthesized following **GP I** using 1.09 mmol (400 mg) of *N*-*boc* protected benzimidazole phosphonate and 3-chlorobenzaldehyde (205.0 mg, 1.46 mmol). CH<sub>2</sub>Cl<sub>2</sub>:Et<sub>3</sub>N 1:1 was used as a solvent for the *N*-tosylation. Purification by flash chromatography on silica gel (8 pentane/2 EtOAc) afforded pure **Bz13** as a colourless powder. (186 mg, 0.455 mmol, 42% overall yield).

**Mp** : 126 °C (from EtOAc/Petrol); **<sup>1</sup>H NMR** (400 MHz, CDCl<sub>3</sub>) δ 8.11 – 8.04 (m, 1H), 7.92 (d, *J* = 15.9 Hz, 1H), 7.84 (d, *J* = 15.9 Hz, 1H), 7.80 – 7.75 (m, 2H), 7.72 – 7.67 (m, 1H), 7.62 (q, *J* = 1.4 Hz, 1H), 7.55 – 7.49 (m, 1H), 7.41 – 7.32 (m, 4H), 7.25 – 7.19 (m, 2H), 2.35 (s, 3H); **<sup>13</sup>C NMR** (101 MHz, CDCl<sub>3</sub>) δ 150.7, 146.2, 142.8, 138.3, 137.8, 135.4, 135.1, 133.3, 130.3 (d, *J* = 3.8 Hz), 129.6, 127.5, 126.9, 126.1, 125.5 (d, *J* = 4.9 Hz), 120.2, 116.0, 114.1, 21.8; **IR** (film) ν<sub>max</sub>/cm<sup>-1</sup>: 3060, 1594, 1511, 1497, 1378, 1343, 1258, 1232, 1201, 1185, 1168, 1150, 1122, 1089, 1052, 782, 764, 744, 702, 690, 671, 645; **HRMS** (ESI<sup>+</sup>): calcd. for C<sub>22</sub>H<sub>18</sub>O<sub>2</sub>N<sub>2</sub>ClS [M+H]<sup>+</sup> 409.0772, found 409.0770.

(E)-1-Tosyl-2-(2-(6-(trifluoromethyl)pyridin-3-yl)vinyl)-1H-benzo[d]imidazole (**Bz14**)

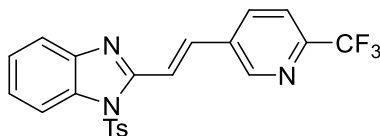

(E)-1-Tosyl-2-(2-(6-(trifluoromethyl)pyridin-3-yl)vinyl)-1H-benzo[d]imidazole was synthesized following **GP I** using 0.68 mmol (250 mg) of *N*-boc protected benzimidazole phosphonate and 6-(trifluoromethyl)nicotinaldehyde (159.4 mg, 0.91 mmol) as the aldehyde. CH<sub>2</sub>Cl<sub>2</sub>:Et<sub>3</sub>N 1:1 was used as a solvent for the *N*-tosylation. Purification by flash chromatography on silica gel (pentane to 8 pentane/2 EtOAc) afforded pure **Bz14** as an off-white powder. (151 mg, 0.341 mmol 51% overall yield).

**Mp** : 158-160 °C (from EtOAc/Petrol); **<sup>1</sup>H NMR** (400 MHz, CDCl<sub>3</sub>) δ 8.96 (d, *J* = 2.1 Hz, 1H), 8.17 – 8.03 (m, 3H), 7.96 (d, *J* = 16.0 Hz, 1H), 7.78 (dd, *J* = 8.3, 4.6 Hz, 3H), 7.76 – 7.71 (m, 1H), 7.47 – 7.37 (m, 2H), 7.28 (d, *J* = 7.6 Hz, 2H), 2.38 (s, 3H); **<sup>13</sup>C NMR** (101 MHz, CDCl<sub>3</sub>) δ 149.7, 149.5, 148.3 (q, *J* = 35.2 Hz), 146.4, 142.6, 135.3, 135.0, 134.4, 134.1, 133.3, 130.5, 126.9, 126.0, 125.7, 120.8 (d, *J* = 2.8 Hz), 120.4, 119.1, 114.1, 21.8; **<sup>19</sup>F NMR** (376 MHz, CDCl<sub>3</sub>) δ -67.9; **IR** (film) ν<sub>max</sub>/cm<sup>-1</sup>: 3062, 1379, 1338, 1171, 1136, 1086, 746, 672; **HRMS** (ESI<sup>+</sup>): calcd. for C<sub>22</sub>H<sub>17</sub>O<sub>2</sub>N<sub>3</sub>F<sub>3</sub>S [M+H]<sup>+</sup> 444.0988, found 444.0984.

## 6/ General Procedures:

### General Procedure for the Thio-1,4 Addition (GP II)

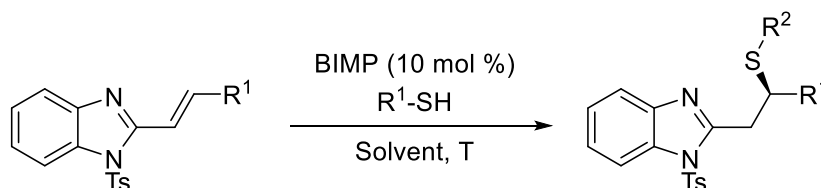

To the corresponding organoazide (0.010 mmol) and tris(4-methoxyphenyl)phosphine (0.010 mmol) under argon atmosphere was added THF (0.2 mL) and the reaction mixture was stirred for 24 h. The formation of the organocatalysts was monitored by TLC. Upon completion volatiles were removed under a stream of N<sub>2</sub> yielding the expected iminophosphorane which was used without further purification.

To the corresponding Michael acceptor (0.10 mmol) and BIMP organocatalyst (0.01 mmol) under argon atmosphere was added Et<sub>2</sub>O (1.60 mL) and thiol (0.12 mmol, 1.2 equivalents) then the reaction was stirred at 0 °C for 24 h. The reaction mixture was loaded directly onto silica gel and purified by flash column chromatography as specified in the individual experiment to afford pure sulfa-Michael addition product. The two enantiomers were separated by chiral HPLC using conditions specified in the individual experiment.

### General Procedure for the Synthesis of Racemate 1,4 Addition Products (GP III)

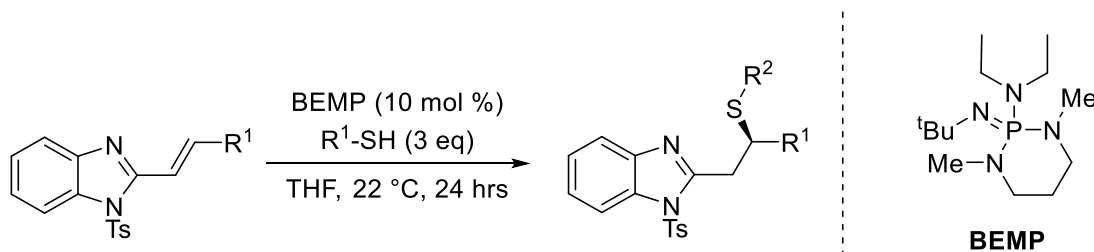

To the corresponding Michael acceptor (0.10 mmol) and 2-*tert*-Butylimino-2-diethylamino-1,3-dimethylperhydro-1,3,2-diazaphosphorine (BEMP) (3  $\mu$ L, 0.010 mmol) under argon was added solvent (0.2 mL) and thiol (0.30 mmol) and the reaction was stirred at 22 °C for 24 h. Volatiles were removed under a stream of N<sub>2</sub> and the crude product was purified by flash column chromatography as specified in the individual experiment to afford the racemic 1,4-addition product. The two enantiomers were separated by chiral HPLC using conditions specified in the individual experiment.

(S)-2-(2-(Propylthio)propyl)-1-tosyl-1H-benzo[d]imidazole (2)

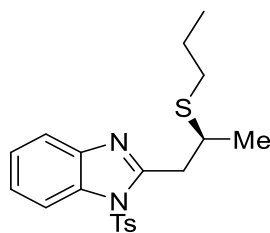

Compound **2** was synthesized according to **GPII** from **1** (31.2 mg) using catalyst **G** and 1-propanethiol (9.1 mg, 11  $\mu$ L). Clear viscous oil (7 Petrol/ 3 EtOAc) (38.0 mg, 0.098 mmol, 98% yield, 95/5 er [determined by HPLC, Chiralpak AD-H, hexane/isopropanol = 95/5, 1 mL/min,  $\lambda$  = 220 nm, t (major) = 16.63 min, t (minor) = 18.00 min])

$[\alpha]_D^{25}$  = -2.0 (c = 0.31,  $\text{CHCl}_3$ );  $^1\text{H NMR}$  (400 MHz,  $\text{CDCl}_3$ )  $\delta$  8.06 – 7.97 (m, 1H), 7.80 – 7.71 (m, 2H), 7.69 – 7.63 (m, 1H), 7.37 – 7.28 (m, 2H), 7.27 – 7.18 (m, 2H), 3.62 – 3.44 (m, 2H), 3.33 – 3.20 (m, 1H), 2.68 – 2.46 (m, 2H), 2.35 (s, 3H), 1.60 (h,  $J$  = 7.2 Hz, 2H), 1.35 – 1.27 (m, 3H), 0.95 (t,  $J$  = 7.3 Hz, 3H);  $^{13}\text{C NMR}$  (101 MHz,  $\text{CDCl}_3$ )  $\delta$  152.8, 146.1, 142.1, 135.5, 133.1, 130.4, 126.9, 125.1, 124.9, 120.1, 113.9, 38.5, 37.9, 33.0, 23.3, 21.8, 21.3, 13.7; **IR** (film)  $\nu_{\text{max}}/\text{cm}^{-1}$ : 2871, 1596, 1481, 1377, 1173, 1189, 765, 667; **HRMS** (ESI +): calcd. for  $\text{C}_{20}\text{H}_{25}\text{O}_2\text{N}_2\text{S}_2$   $[\text{M}+\text{H}]^+$  389.1352, Found 389.1352.

(S)-2-(2-(Pentylthio)propyl)-1-tosyl-1H-benzo[d]imidazole (3)

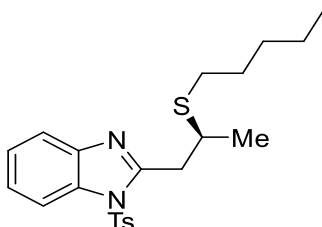

Compound **3** was synthesized according to **GPII** from **1** (31.2 mg) using catalyst **G** using pentane-1-thiol (12.5 mg, 15  $\mu$ L). Clear oil (7 Petrol/ 3 EtOAc) (32.7 mg, 0.078 mmol, 78% yield, 95/5 er [determined by HPLC, Chiralcel OG, hexane/isopropanol = 97/3, 1 mL/min,  $\lambda$  = 220 nm, t (minor) = 8.48 min, t (major) = 10.33 min]).

$[\alpha]_D^{25}$  = -3.7 (c = 0.48,  $\text{CHCl}_3$ );  $^1\text{H NMR}$  (400 MHz,  $\text{CDCl}_3$ )  $\delta$  8.08 – 7.93 (m, 1H), 7.82 – 7.71 (m, 2H), 7.70 – 7.61 (m, 1H), 7.39 – 7.29 (m, 2H), 7.28 – 7.23 (m, 2H), 3.66 – 3.42 (m, 2H), 3.36 – 3.20 (m, 1H), 2.71 – 2.49 (m, 2H), 2.37 (s, 3H), 1.66 – 1.51 (m, 2H), 1.41 – 1.20 (m, 7H), 0.87 (t,  $J$  = 7.1 Hz, 3H);  $^{13}\text{C NMR}$  (101 MHz,  $\text{CDCl}_3$ )  $\delta$  152.8, 146.1, 142.1, 135.5, 133.1, 130.3, 126.9, 125.0, 124.8, 120.1, 113.9, 38.5, 37.9, 31.3, 31.0, 29.6, 22.4, 21.8, 21.3, 14.1; **IR** (film)  $\nu_{\text{max}}/\text{cm}^{-1}$ : 2956, 2928, 2859, 1451, 1378, 1172, 1089, 1044, 1014, 745, 703, 667; **HRMS** (ESI +): calcd. for  $\text{C}_{22}\text{H}_{29}\text{O}_2\text{N}_2\text{S}_2$   $[\text{M}+\text{H}]^+$  417.1665, Found 417.1663.

(S)-2-(2-(Isopropylthio)propyl)-1-tosyl-1H-benzo[d]imidazole (4)

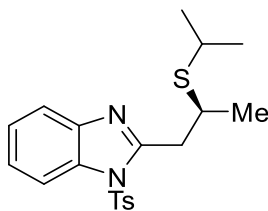

Compound **4** was synthesized according to a modified of **GPII** from **1** (31.2 mg) using catalyst **G**, propane-2-thiol (9.13 mg, 11  $\mu$ L) and stirred at 22 °C. Clear viscous oil (7 Petrol/ 3 EtOAc) (29.8 mg, 0.077 mmol, 78% yield, 94/6 er [determined by HPLC, Chiralpak AD-H, hexane/isopropanol = 95/5, 1 mL/min,  $\lambda$  = 220 nm, t (major) = 15.60 min, t (minor) = 18.00 min]).

$[\alpha]_D^{25}$  = -7.5 (c = 0.58,  $\text{CHCl}_3$ );  $^1\text{H NMR}$  (400 MHz,  $\text{CDCl}_3$ )  $\delta$  8.06 – 7.95 (m, 1H), 7.82 – 7.74 (m, 2H), 7.70 – 7.62 (m, 1H), 7.39 – 7.28 (m, 2H), 7.26 (dt,  $J$  = 7.3, 0.8 Hz, 2H), 3.66 – 3.55 (m, 1H), 3.50 (dd,  $J$  = 15.4, 5.2 Hz, 1H), 3.34 – 3.24 (m, 1H), 3.04 (p,  $J$  = 6.7 Hz, 1H), 2.38 (s, 3H), 1.35 – 1.27 (m, 6H), 1.24 (d,  $J$  = 6.7 Hz, 3H);  $^{13}\text{C NMR}$  (101 MHz,  $\text{CDCl}_3$ )  $\delta$  152.8, 146.1, 142.1, 135.5, 133.1, 130.3, 126.9, 125.0, 124.8, 120.1, 113.9, 38.2, 37.3, 34.5, 24.1, 23.8, 21.8, 21.7; **IR** (film)  $\nu_{\text{max}}/\text{cm}^{-1}$ : 2960, 1541, 1337, 1293, 1149, 1089, 745, 667; **HRMS** (ESI +): calcd. for  $\text{C}_{20}\text{H}_{25}\text{O}_2\text{N}_2\text{S}_2$   $[\text{M}+\text{H}]^+$  389.1352, Found 389.1352.

(S)-2-(2-(Cyclopentylthio)propyl)-1-tosyl-1H-benzo[d]imidazole (5)

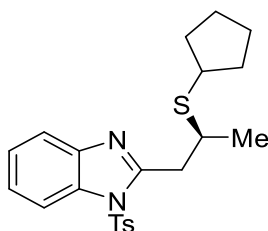

Compound **5** was synthesized according to a modified version of **GPII** from **1** (31.2 mg) using catalyst **G**, cyclopentanethiol (12.3 mg, 13  $\mu$ L) and stirred at 22 °C. Clear oil (7 Petrol/ 3 EtOAc) (37.7 mg, 0.091 mmol, 91% yield, 95/5 er [determined by HPLC, Chiralcel OG, hexane/isopropanol = 97/3, 1 mL/min,  $\lambda$  = 220 nm, t (minor) = 10.11 min, t (major) = 11.28 min]).

$[\alpha]_D^{25}$  = -6.3 (c = 0.48,  $\text{CHCl}_3$ );  $^1\text{H NMR}$  (400 MHz,  $\text{CDCl}_3$ )  $\delta$  8.02 – 7.89 (m, 1H), 7.76 – 7.67 (m, 2H), 7.64 – 7.55 (m, 1H), 7.31 – 7.22 (m, 2H), 7.21 – 7.12 (m, 2H), 3.60 – 3.44 (m, 2H), 3.29 – 3.05 (m, 2H), 2.30 (s, 3H), 2.12 – 1.77 (m, 2H), 1.74 – 1.34 (m, 6H), 1.26 (d,  $J$  = 6.7 Hz, 3H);  $^{13}\text{C NMR}$  (101 MHz,  $\text{CDCl}_3$ )  $\delta$  152.9, 146.1, 142.0, 135.5, 133.1, 130.3, 126.9, 125.0, 124.8, 120.0, 113.8, 43.0, 38.5, 38.1, 34.6, 34.3, 24.9, 21.8, 21.5; **IR** (film)  $\nu_{\text{max}}/\text{cm}^{-1}$ : 2957, 2960, 1541, 1377, 1293, 1149, 1089, 745, 667; **HRMS** (ESI +): calcd. for  $\text{C}_{22}\text{H}_{27}\text{O}_2\text{N}_2\text{S}_2$   $[\text{M}+\text{H}]^+$  415.1508, Found 415.1507.



2-(2-(Phenethylthio)propyl)-1-tosyl-1H-benzo[d]imidazole (6)

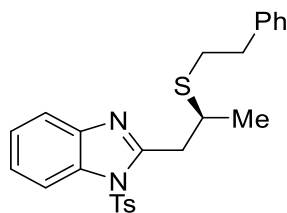

Compound **6** was synthesized according to **GPII** from **1** (31.2 mg) using catalyst **G** and 2-phenylethane-1-thiol (16.6 mg, 16  $\mu$ L). Pale yellow amorphous solid (7 Petrol/ 3 EtOAc) (42.1 mg, 0.093 mmol, 93% yield, 92.5/7.5 er [determined by HPLC, Chiralpak AD-H, hexane/isopropanol = 95/5, 1 mL/min,  $\lambda$  = 220 nm, t (minor) = 27.01 min, t (major) = 28.93 min])

$[\alpha]_D^{25}$  = 6.9 (c = 0.71,  $\text{CHCl}_3$ );  $^1\text{H NMR}$  (400 MHz,  $\text{CDCl}_3$ )  $\delta$  8.08 – 8.01 (m, 1H), 7.78 (d,  $J$  = 8.4 Hz, 2H), 7.73 – 7.66 (m, 1H), 7.41 – 7.32 (m, 2H), 7.32 – 7.17 (m, 7H), 3.70 – 3.51 (m, 2H), 3.32 (dd,  $J$  = 15.0, 8.5 Hz, 1H), 3.01 – 2.75 (m, 4H), 2.38 (s, 3H), 1.38 (d,  $J$  = 6.7 Hz, 3H);  $^{13}\text{C NMR}$  (101 MHz,  $\text{CDCl}_3$ )  $\delta$  152.7, 146.1, 142.0, 140.7, 135.5, 133.1, 130.4, 128.6, 128.5, 126.8, 126.4, 125.1, 124.9, 120.1, 113.9, 38.7, 37.9, 36.5, 32.4, 21.7, 21.3; **IR** (film)  $\nu_{\text{max}}/\text{cm}^{-1}$ : 2980, 1452, 1378, 1252, 1170, 1045, 668; **HRMS** (ESI +) calcd. for  $\text{C}_{25}\text{H}_{27}\text{O}_2\text{N}_2\text{S}_2$   $[\text{M}+\text{H}]^+$  451.1508, Found 451.1505.

(S)-1-Tosyl-2-(2-((2-(trimethylsilyl)ethyl)thio)propyl)-1H-benzo[d]imidazole (7)

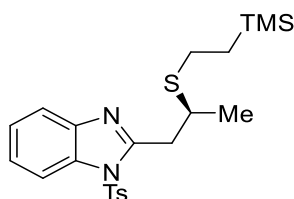

Compound **7** was synthesized according to **GPII** from **1** (31.2 mg) using catalyst **G** and 2-(trimethylsilyl)ethane-1-thiol (16.1 mg, 19  $\mu$ L). Clear oil (7 Petrol/ 3 EtOAc) (41.3 mg, 0.094 mmol, 94% yield, 96/4 er [determined by HPLC, Chiralcel AD-H, hexane/isopropanol = 95/5, 1 mL/min,  $\lambda$  = 220 nm, t (minor) = 10.54 min, t (major) = 9.56 min]).

$[\alpha]_D^{25}$  = -11.1 (c = 0.82,  $\text{CHCl}_3$ );  $^1\text{H NMR}$  (400 MHz,  $\text{CDCl}_3$ )  $\delta$  8.09 – 7.99 (m, 1H), 7.84 – 7.77 (m, 2H), 7.73 – 7.65 (m, 1H), 7.41 – 7.32 (m, 2H), 7.32 – 7.27 (m, 2H), 3.69 – 3.50 (m, 2H), 3.32 (dd,  $J$  = 15.1, 8.5 Hz, 1H), 2.75 – 2.52 (m, 2H), 2.40 (s, 3H), 1.37 (d,  $J$  = 6.7 Hz, 3H), 0.99 – 0.77 (m, 2H), 0.01 (s, 9H);  $^{13}\text{C NMR}$  (101 MHz,  $\text{CDCl}_3$ )  $\delta$  152.9, 146.1, 142.0, 135.5, 133.2, 130.4, 126.9, 125.1, 124.9, 120.1, 113.9, 38.5, 38.0, 26.7, 21.8, 21.2, 17.4, -1.7; **IR** (film)  $\nu_{\text{max}}/\text{cm}^{-1}$ : 2953, 1597, 1542, 1451, 1378, 1248, 1191, 1171, 1149, 1090, 1044, 859, 745, 687, 666; **HRMS** (APCI +) calcd. for  $\text{C}_{22}\text{H}_{31}\text{O}_2\text{N}_2\text{S}_2\text{Si}$   $[\text{M}+\text{H}]^+$  447.1591, Found 447.1589.

(S)-2-(2-((Furan-2-ylmethyl)thio)propyl)-1-tosyl-1H-benzo[d]imidazole (8)

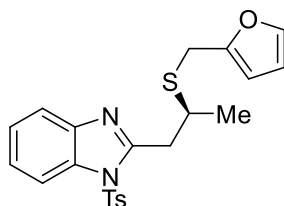

Compound **8** was synthesized according to **GPII** from **1** (31.2 mg) using catalyst **G** and furan-2-ylmethanethiol (13.7 mg, 12  $\mu$ L). Clear oil (7 Petrol/ 3 EtOAc) (38.7 mg, 0.091 mmol, 91% yield, 89/11 er [determined by HPLC, Chiralcel AD-H, hexane/isopropanol = 85/15, 1 mL/min,  $\lambda$  = 220 nm, t (minor) = 15.18 min, t (major) = 13.72 min]).

$[\alpha]_D^{25}$  = -27.5 (c = 0.83,  $\text{CHCl}_3$ );  $^1\text{H NMR}$  (400 MHz,  $\text{CDCl}_3$ )  $\delta$  8.04 – 7.97 (m, 1H), 7.82 – 7.73 (m, 2H), 7.69 – 7.62 (m, 1H), 7.39 – 7.30 (m, 3H), 7.29 – 7.22 (m, 2H), 6.33 – 6.16 (m, 2H), 3.90 – 3.77 (m, 2H), 3.65 – 3.56 (m, 1H), 3.55 – 3.46 (m, 1H), 3.36 – 3.25 (m, 1H), 2.37 (s, 3H), 1.34 (d,  $J$  = 6.7 Hz, 3H);  $^{13}\text{C NMR}$  (101 MHz,  $\text{CDCl}_3$ )  $\delta$  152.6, 151.9, 146.1, 142.1, 142.1, 135.5, 133.1, 130.4, 126.9, 125.1, 124.9, 120.1, 113.8, 110.6, 107.5, 38.9, 37.9, 27.9, 21.8, 21.1; **IR** (film)  $\nu_{\text{max}}/\text{cm}^{-1}$ : 2923, 1596, 1541, 1451, 1376, 1233, 1191, 1170, 1149, 1121, 1089, 1045, 1012, 744, 703, 685, 666, 643; **HRMS** (APCI +) calcd. for  $\text{C}_{22}\text{H}_{23}\text{O}_3\text{N}_2\text{S}_2$   $[\text{M}+\text{H}]^+$  427.1144, Found 427.1141.

(S)-2-(2-(Benzylthio)propyl)-1-tosyl-1H-benzo[d]imidazole (9)

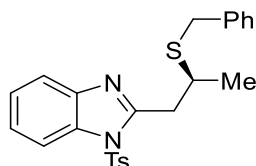

Compound **9** was synthesized according to **GPII** from **1** (31.2 mg) using catalyst **G** and phenylmethanethiol (14.9 mg, 14  $\mu$ L). Clear oil (7 Petrol/ 3 EtOAc) (41.2 mg, 0.089 mmol, 89% yield, 89/11 er [determined by HPLC, Chiralpak AD-H, hexane/isopropanol = 95/5, 1 mL/min,  $\lambda$  = 220 nm, t (major) = 24.54 min, t (minor) = 29.98 min]).

$[\alpha]_D^{25}$  = -19.5 (c = 0.73,  $\text{CHCl}_3$ )  $^1\text{H NMR}$  (400 MHz,  $\text{CDCl}_3$ )  $\delta$  7.95 – 7.88 (m, 1H), 7.65 (d,  $J$  = 8.4 Hz, 2H), 7.61 – 7.53 (m, 1H), 7.31 – 7.07 (m, 10H), 3.75 (d,  $J$  = 4.3 Hz), 3.54 – 3.42 (m, 2H), 3.28 – 3.13 (m, 1H), 2.28 (s, 3H), 1.24 (d,  $J$  = 6.5 Hz, 3H);  $^{13}\text{C NMR}$  (101 MHz,  $\text{CDCl}_3$ )  $\delta$  152.6, 146.1, 142.0, 138.5, 135.5, 133.1, 130.3, 128.9, 128.6, 127.0, 126.8, 125.0, 124.8, 120.1, 113.8, 38.9, 37.8, 35.7, 21.8, 21.3; **IR** (film)  $\nu_{\text{max}}/\text{cm}^{-1}$ : 3060, 3028, 2964, 1451, 1376, 1170, 1044, 643; **HRMS** (ESI +) calcd. for  $\text{C}_{24}\text{H}_{25}\text{O}_2\text{N}_2\text{S}_2$   $[\text{M}+\text{H}]^+$  437.1352, Found 437.1344.

(S)-2-(2-((4-Methoxybenzyl)thio)propyl)-1-tosyl-1H-benzo[d]imidazole (10)

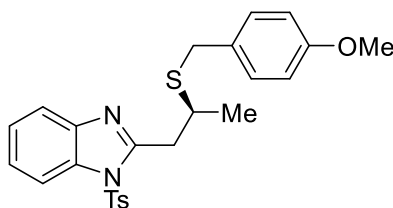

Compound **10** was synthesized according to **GP II** from **1** (31.2 mg) using catalyst **G** and (4-methoxyphenyl)methanethiol (18.5 mg, 17  $\mu$ L). Amorphous colourless solid (7 Petrol/ 3 EtOAc) (45.5 mg, 0.098 mmol, 98% yield, 92/8 er [determined by HPLC, Chiralpak AD-H, hexane/isopropanol = 85/15, 1 mL/min,  $\lambda$  = 220 nm, t (major) = 14.95 min, t (minor) = 18.30 min]).

$[\alpha]_D^{25}$  = -19.9 (c = 0.52, CHCl<sub>3</sub>); **<sup>1</sup>H NMR** (400 MHz, CDCl<sub>3</sub>)  $\delta$  8.05 – 7.98 (m, 1H), 7.80 – 7.71 (m, 2H), 7.70 – 7.62 (m, 1H), 7.40 – 7.29 (m, 2H), 7.29 – 7.16 (m, 4H), 6.85 – 6.76 (m, 2H), 3.78 (s + m, 5H), 3.60 – 3.47 (m, 2H), 3.36 – 3.20 (m, 1H), 2.37 (s, 3H), 1.33 (d,  $J$  = 6.5 Hz, 3H); **<sup>13</sup>C NMR** (101 MHz, CDCl<sub>3</sub>)  $\delta$  158.6, 152.7, 146.1, 142.1, 135.5, 133.1, 130.4, 130.3, 130.0, 125.1, 124.9, 120.1, 114.0, 113.9, 55.4, 38.8, 37.9, 35.1, 21.8, 21.3; **IR** (film)  $\nu_{\max}/\text{cm}^{-1}$ : 3023, 1541, 1500, 1451, 1376, 1171, 1013, 884, 668; **HRMS** (ESI+) calcd. for C<sub>25</sub>H<sub>27</sub>O<sub>3</sub>N<sub>2</sub>S<sub>2</sub> [M+H]<sup>+</sup> 467.1457, Found 467.1454.

(S)-2-(2-(Propylthio)hept-6-en-1-yl)-1-tosyl-1H-benzo[d]imidazole (11)

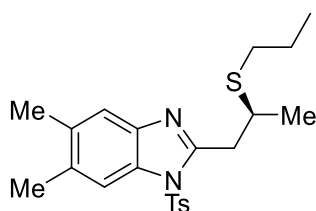

Compound **11** was synthesized according **GP III** from **Bz2** (34.0 mg) using catalyst **G**, 1-propanethiol (9.1 mg, 11  $\mu$ L). Clear oil (9 Pentane/ 1 EtOAc) (33.7 mg, 0.081 mmol, 81% yield, 86/14 er [determined by HPLC, Chiralcel AD-H, hexane/isopropanol = 95/5, 1 mL/min,  $\lambda$  = 220 nm, t (minor) = 22.89 min, t (major) = 21.24 min]).

$[\alpha]_D^{25}$  = -3.5 (c = 1.0, CHCl<sub>3</sub>); **<sup>1</sup>H NMR** (400 MHz, CDCl<sub>3</sub>)  $\delta$  = 7.78 (s, 1H), 7.75 (d,  $J$  = 8.4 Hz, 2H), 7.41 (d,  $J$  = 0.9 Hz, 1H), 7.26 (dd,  $J$  = 8.5, 1.0 Hz, 2H), 3.56 – 3.44 (m, 2H), 3.27 – 3.18 (m, 1H), 2.63 – 2.48 (m, 2H), 2.38 (s, 3H), 2.37 (s, 3H), 2.32 (s, 3H), 1.67 – 1.53 (m, 2H), 1.30 (d,  $J$  = 6.8 Hz, 4H), 0.97 (t,  $J$  = 7.3 Hz, 3H); **<sup>13</sup>C NMR** (101 MHz, CDCl<sub>3</sub>)  $\delta$  = 152.0, 145.9, 140.5, 135.8, 134.3, 133.8, 131.6, 130.3, 126.7, 120.2, 114.1, 38.5, 37.9, 33.0, 23.3, 21.7, 21.2, 20.8, 20.3, 13.7; **IR** (film)  $\nu_{\max}/\text{cm}^{-1}$ : 2962, 2925, 1596, 1463, 1375, 1230, 1190, 1172, 1090, 1037, 811, 667; **HRMS** (ESI+): calcd. for C<sub>22</sub>H<sub>29</sub>O<sub>2</sub>N<sub>2</sub>S<sub>2</sub> [M+H]<sup>+</sup> 417.1665, found 417.1663.

(S)-6-Bromo-2-(2-(propylthio)propyl)-1-tosyl-1H-benzo[d]imidazole (12)

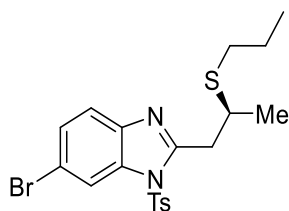

Compound **12** was synthesized according **GP III** from **Bz5** (39.1 mg) using catalyst **G**, 1-propanethiol (9.1 mg, 11  $\mu$ L). Clear oil (95 Pentane/ 5 EtOAc) (36.0 mg, 0.077 mmol, 77% yield, 86/14 er [determined by HPLC, Chiralcel AD-H, hexane/isopropanol = 95/5, 1 mL/min,  $\lambda$  = 220 nm, t (minor) = 17.65 min, t (major) = 15.93 min]).

$[\alpha]_D^{25}$  = -5.9 (c = 1.0,  $\text{CHCl}_3$ );  $^1\text{H NMR}$  (400 MHz,  $\text{CDCl}_3$ )  $\delta$  8.21 (d,  $J$  = 1.8 Hz, 1H), 7.78 (d,  $J$  = 8.4 Hz, 2H), 7.52 (d,  $J$  = 8.6 Hz, 1H), 7.44 (dd,  $J$  = 8.5, 1.8 Hz, 1H), 7.31 (d,  $J$  = 7.8 Hz, 2H), 3.57 – 3.41 (m, 2H), 3.24 (dd,  $J$  = 15.4, 8.5 Hz, 1H), 2.62 – 2.49 (m, 2H), 2.40 (s, 3H), 1.61 (h,  $J$  = 7.3 Hz, 3H), 1.32 (d,  $J$  = 6.5 Hz, 4H), 0.97 (t,  $J$  = 7.3 Hz, 3H);  $^{13}\text{C NMR}$  (101 MHz,  $\text{CDCl}_3$ )  $\delta$  = 153.5, 146.5, 141.1, 135.3, 134.1, 130.5, 128.3, 127.0, 121.2, 118.5, 117.0, 38.4, 37.9, 33.0, 23.3, 21.9, 21.4, 13.7; **IR** (film)  $\nu_{\text{max}}/\text{cm}^{-1}$ : 2961, 2926, 1730, 1596, 1447, 1424, 1379, 1269, 1191, 1162, 1089, 1037, 939, 813, 708, 664; **HRMS** (ESI+): calcd. for  $\text{C}_{20}\text{H}_{24}\text{O}_2\text{N}_2\text{BrS}_2$   $[\text{M}+\text{H}]^+$  467.0457 and 469.0436, found. 467.04565 and 469.0433

(S)-5-Bromo-2-(2-(propylthio)propyl)-1-tosyl-1H-benzo[d]imidazole (13)

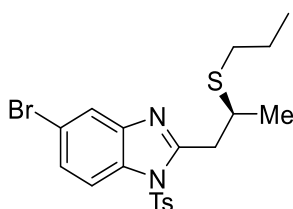

Compound **13** was synthesized according **GP III** from **Bz6** (39.1 mg) using catalyst **G**, 1-propanethiol (9.1 mg, 11  $\mu$ L). Clear oil (95 Pentane/ 5 EtOAc) (38.8 mg, 0.083 mmol, 81% yield, 84/16 er [determined by HPLC, Chiralcel AD-H, hexane/isopropanol = 95/5, 1 mL/min,  $\lambda$  = 220 nm, t (minor) = 19.17 min, t (major) = 20.44 min]).

$[\alpha]_D^{25}$  = -4.4 (c = 1.0,  $\text{CHCl}_3$ );  $^1\text{H NMR}$  (400 MHz,  $\text{CDCl}_3$ )  $\delta$  7.89 (d,  $J$  = 8.7 Hz, 1H), 7.80 (d,  $J$  = 1.9 Hz, 1H), 7.75 (d,  $J$  = 8.4 Hz, 2H), 7.45 (dd,  $J$  = 8.8, 1.9 Hz, 1H), 7.32 – 7.25 (m, 2H), 3.57 – 3.43 (m, 2H), 3.32 – 3.20 (m, 1H), 2.64 – 2.47 (m, 2H), 2.39 (s, 3H), 1.68 – 1.54 (m, 3H), 1.33 (d,  $J$  = 6.8 Hz, 3H), 0.97 (t,  $J$  = 7.3 Hz, 3H);  $^{13}\text{C NMR}$  (101 MHz,  $\text{CDCl}_3$ )  $\delta$  154.1, 146.5, 143.4, 135.3, 132.2, 130.5, 128.0, 126.9, 123.1, 118.0, 115.1, 38.4, 37.9, 33.0, 23.3, 21.8, 21.4, 13.7; **IR** (film)  $\nu_{\text{max}}/\text{cm}^{-1}$ : 2921, 2926, 1596, 1535, 1448, 1379, 1230, 1172, 1089, 1044, 910, 809, 705, 665; **HRMS** (ESI+): calcd. for  $\text{C}_{20}\text{H}_{24}\text{O}_2\text{N}_2\text{BrS}_2$   $[\text{M}+\text{H}]^+$  467.0457 and 469.0436, found 467.0454 and 469.0431.

Benzyl-2-(2-(propylthio)propyl)-1*H*-benzo[*d*]imidazole-1-carboxylate (**14**)

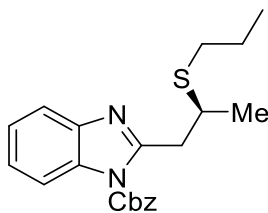

Compound **14** was synthesized according to a modified version of **GPII** from **Bz3** (29.2 mg) using catalyst **G**, 3 equivalents of 1-propanethiol (22.8 mg, 0.3 mmol, 28  $\mu$ L) and stirred at 22 °C. Clear oil (9 Petrol/ 1 EtOAc) (22.3 mg, 0.061 mmol, 61% yield, 92.5/7.5 er [determined by HPLC, Chiralpak AS-H, hexane/isopropanol = 97/3, 1 mL/min,  $\lambda$  = 220 nm, t (minor) = 10.23 min, t (major) = 11.45 min])

$[\alpha]_D^{25}$  = +2.0 (c = 0.40, CHCl<sub>3</sub>); **<sup>1</sup>H NMR** (400 MHz, CDCl<sub>3</sub>)  $\delta$  7.92 – 7.83 (m, 1H), 7.75 – 7.65 (m, 1H) 7.55 – 7.49 (m, 2H), 7.47 – 7.38 (m, 3H), 7.35 – 7.25 (m, 2H), 5.51 (d, *J* = 1.0 Hz, 2H), 3.63 (dd, *J* = 14.6, 5.3 Hz, 1H), 3.47 – 3.36 (m, 1H), 3.31 (dd, *J* = 14.6, 8.8 Hz, 1H), 2.67 – 2.44 (m, 2H), 1.59 (h, *J* = 7.4 Hz, 2H), 1.34 (d, *J* = 6.7 Hz, 3H), 0.96 (t, *J* = 7.3 Hz, 3H); **<sup>13</sup>C NMR** (101 MHz, CDCl<sub>3</sub>)  $\delta$  154.3, 150.5, 142.3, 134.3, 132.8, 129.3, 129.1, 129.0, 124.8, 124.6, 119.9, 115.2, 69.8, 38.9, 38.2, 32.7, 23.3, 21.4, 13.7; **IR** (film)  $\nu_{\max}$ /cm<sup>-1</sup>: 2964, 1749, 1455, 1385, 1338, 1296, 1258, 1194, 1088, 1081, 746; **HRMS** (ESI +) calcd. for C<sub>21</sub>H<sub>25</sub>O<sub>2</sub>N<sub>2</sub>S [M+H]<sup>+</sup> 369.1631, Found 369.1626.

*tert*-butyl-2-(2-(propylthio)propyl)-1*H*-benzo[*d*]imidazole-1-carboxylate (**15**)

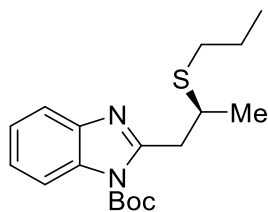

Compound **15** was synthesized according to a modified version of **GPII** from **Bz4** (25.8 mg) using catalyst **G**, 3 equivalents of 1-propanethiol (22.8 mg, 0.3 mmol, 28  $\mu$ L) and stirred at 22 °C. Clear oil (8 Petrol/ 2 EtOAc) (32.7 mg, 0.097 mmol, 97% yield, 91.5/8.5 er [determined by HPLC, Chiralpak AD-H, hexane/isopropanol = 97/3, 1 mL/min,  $\lambda$  = 220 nm, t (major) = 7.30 min, t (minor) = 6.61 min])

$[\alpha]_D^{25}$  = - 3.6 (c = 0.43, CHCl<sub>3</sub>); **<sup>1</sup>H NMR** (400 MHz, CDCl<sub>3</sub>)  $\delta$  7.93 – 7.85 (m, 1H), 7.75 – 7.61 (m, 1H), 7.35 – 7.27 (m, 2H), 3.64 (dd, *J* = 14.7, 5.3 Hz, 1H), 3.43 (ddd, *J* = 9.0, 6.8, 5.3 Hz, 1H), 3.30 (dd, *J* = 14.7, 9.0 Hz, 1H), 2.66 – 2.46 (m, 2H), 1.72 (s, 9H), 1.60 (dt, *J* = 14.7, 7.4 Hz, 2H), 1.37 (d, *J* = 6.7 Hz, 3H), 0.97 (t, *J* = 7.3 Hz, 3H); **<sup>13</sup>C NMR** (101 MHz, CDCl<sub>3</sub>)  $\delta$  154.4, 149.1, 142.2, 137.7, 124.4, 124.2, 119.8, 115.1, 85.7, 38.9, 38.1, 32.6, 28.2, 23.3, 21.3, 13.7 ; **IR** (film)  $\nu_{\max}$ /cm<sup>-1</sup>: 2970, 1745, 1454, 1341, 1153, 1120, 745; **HRMS** (ESI +) calcd. for C<sub>18</sub>H<sub>27</sub>O<sub>2</sub>N<sub>2</sub>S [M+H]<sup>+</sup> 335.1787, Found 335.1787

(S)-2-(2-(Propylthio)hexyl)-1-tosyl-1H-benzo[d]imidazole (16)

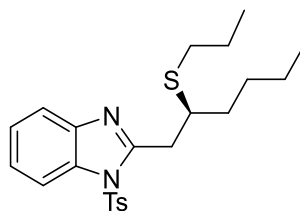

Compound **16** was synthesized according **GP III** from **Bz7** (35.5 mg) using catalyst **G**, 1-propanethiol (9.1 mg, 11  $\mu$ L). Clear oil (7 Pentane/ 3 EtOAc) (35.7 mg, 0.083 mmol, 83% yield, 93/7 er [determined by HPLC, Chiralcel AD-H, hexane/isopropanol = 95/5, 1 mL/min,  $\lambda$  = 220 nm, t (minor) = 13.39 min, t (major) = 22.26 min]).

$[\alpha]_D^{25}$  = -14.9 (c = 1.0,  $\text{CHCl}_3$ ).  $^1\text{H NMR}$  (400 MHz,  $\text{CDCl}_3$ )  $\delta$  = 8.06 – 7.98 (m, 1H), 7.78 (d,  $J$  = 8.4 Hz, 2H), 7.70 – 7.64 (m, 1H), 7.41 – 7.30 (m, 2H), 7.27 (d,  $J$  = 8.4 Hz, 2H), 3.55 – 3.31 (m, 3H), 2.58 – 2.42 (m, 2H), 2.38 (s, 3H), 1.66 – 1.49 (m, 5H), 1.38 – 1.22 (m, 3H), 0.93 (t,  $J$  = 7.3 Hz, 3H), 0.86 (t,  $J$  = 7.2 Hz, 3H);  $^{13}\text{C NMR}$  (101 MHz,  $\text{CDCl}_3$ )  $\delta$  = 153.2, 146.1, 142.1, 135.7, 133.2, 130.3, 126.9, 125.0, 124.8, 120.1, 113.9, 44.3, 36.9, 34.5, 33.1, 29.0, 23.3, 22.7, 21.8, 14.2, 13.7; **IR** (film)  $\nu_{\text{max}}/\text{cm}^{-1}$ : 2958, 2928, 2871, 1451, 1377, 1237, 1189, 1177, 1148, 1120, 1089, 1045, 1014, 812, 765, 745, 703, 666, 623; **HRMS** (ESI+): calcd. for  $\text{C}_{23}\text{H}_{31}\text{O}_2\text{N}_2\text{S}_2$   $[\text{M}+\text{H}]^+$  431.1820, found 431.1821.

(S)-2-(4-Phenyl-2-(propylthio)butyl)-1-tosyl-1H-benzo[d]imidazole (17)

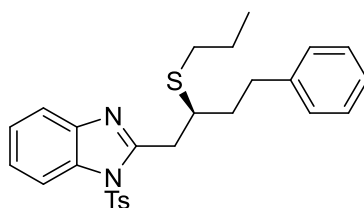

Compound **17** was synthesized according **GP III** from **Bz8** (40.3 mg) using catalyst **G**, 1-propanethiol (9.1 mg, 11  $\mu$ L). Clear oil (7 Pentane/ 3 EtOAc) (43.3 mg, 0.090 mmol, 90 % yield, 96/4 er [determined by HPLC, Chiralcel OG, hexane/isopropanol = 97/3 , 1 mL/min,  $\lambda$  = 220 nm, t (minor) = 13.04 min, t (major) = 15.69 min]).

$[\alpha]_D^{25}$  = -9.1 (c = 1.12,  $\text{CHCl}_3$ );  $^1\text{H NMR}$  (400 MHz,  $\text{CDCl}_3$ )  $\delta$  8.09 – 8.00 (m, 1H), 7.84 – 7.76 (m, 2H), 7.74 – 7.64 (m, 1H), 7.43 – 7.32 (m, 2H), 7.31 – 7.24 (m, 4H), 7.23 – 7.13 (m, 3H), 3.66 – 3.56 (m, 1H), 3.55 – 3.35 (m, 2H), 2.95 (ddd,  $J$  = 13.7, 10.7, 5.0 Hz, 1H), 2.83 – 2.66 (m, 1H), 2.66 – 2.48 (m, 2H), 2.38 (s, 3H), 2.06 – 1.95 (m, 1H), 1.87 (dddd,  $J$  = 13.9, 10.7, 8.1, 5.0 Hz, 1H), 1.68 – 1.59 (m, 2H), 0.99 (t,  $J$  = 7.3 Hz, 3H);  $^{13}\text{C NMR}$  (101 MHz,  $\text{CDCl}_3$ )  $\delta$  152.8, 146.1, 142.1, 141.9, 135.6, 133.2, 130.3, 128.5, 128.4, 126.8, 125.9, 125.0, 124.8, 120.1, 113.9, 43.9, 36.8, 36.3, 33.1, 33.0, 23.3, 21.8, 13.7; **IR** (film)  $\nu_{\text{max}}/\text{cm}^{-1}$ : 3026, 2960, 2925, 2870, 1597, 1452, 1190, 1176, 1147, 1121, 1089, 1047, 812, 765, 745, 701, 667, 643; **HRMS** (APCI+): calcd. for  $\text{C}_{27}\text{H}_{31}\text{O}_2\text{N}_2\text{S}_2$   $[\text{M}+\text{H}]^+$  479.1821, found 479.1816.

(S)-2-(2-(Propylthio)hept-6-en-1-yl)-1-tosyl-1H-benzo[d]imidazole (18)

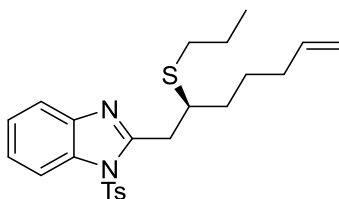

Compound **18** was synthesized according **GP III** from **Bz9** (36.6 mg) using catalyst **G**, 1-propanethiol (9.1 mg, 11  $\mu$ L). Clear oil (8 Pentane/ 2 EtOAc) (34.1 mg, 0.077 mmol, 77% yield, 94.5/5.5 er [determined by HPLC, Chiralcel I-B, hexane/isopropanol = 98/2, 1 mL/min,  $\lambda$  = 220 nm, t (minor) = 8.41 min, t (major) = 8.87 min]).

$[\alpha]_D^{25}$  = -17.9 (c = 1.0,  $\text{CHCl}_3$ );  $^1\text{H NMR}$  (400 MHz,  $\text{CDCl}_3$ )  $\delta$  = 8.05 – 7.98 (m, 1H), 7.77 (d,  $J$  = 8.4 Hz, 2H), 7.69 – 7.64 (m, 1H), 7.37 – 7.29 (m, 2H), 7.26 (d,  $J$  = 8.6 Hz, 2H), 5.75 (ddt,  $J$  = 16.9, 10.2, 6.6 Hz, 1H), 4.96 (dq,  $J$  = 17.1, 1.6 Hz, 1H), 4.90 (ddt,  $J$  = 10.2, 2.1, 1.1 Hz, 1H), 3.51 (dd,  $J$  = 14.0, 5.3 Hz, 1H), 3.45 – 3.39 (m, 1H), 3.36 (dd,  $J$  = 14.6, 7.7 Hz, 1H), 2.59 – 2.41 (m, 2H), 2.37 (s, 3H), 2.05 – 1.98 (m, 2H), 1.72 – 1.47 (m, 7H), 0.93 (t,  $J$  = 7.3 Hz, 3H);  $^{13}\text{C NMR}$  (101 MHz,  $\text{CDCl}_3$ )  $\delta$  = 153.0, 146.1, 142.1, 138.7, 135.6, 133.2, 130.3, 126.9, 125.0, 124.8, 120.9, 114.7, 113.9, 77.5, 77.2, 76.8, 44.1, 36.9, 34.1, 33.6, 33.1, 26.1, 23.3, 21.8, 13.7; **IR** (film)  $\nu_{\text{max}}/\text{cm}^{-1}$ : 2930, 2859, 1735, 1452, 1378, 1247, 1177, 1089, 1045, 745, 666; **HRMS** (ESI+): calcd. for  $\text{C}_{24}\text{H}_{31}\text{O}_2\text{N}_2\text{S}_2$   $[\text{M}+\text{H}]^+$  443.1815, found 443.1821.

(S)-2-(2-(Propylthio)hex-5-yn-1-yl)-1-tosyl-1H-benzo[d]imidazole (19)

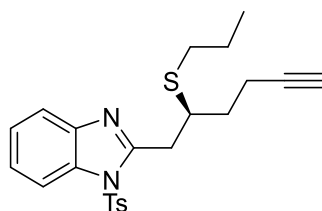

Compound **19** was synthesized according **GP III** from **Bz10** (35.0 mg) using catalyst **G**, 1-propanethiol (9.1 mg, 11  $\mu$ L). Clear oil (8 Pentane/ 2  $\text{Et}_2\text{O}$ ) (34.1 mg, 0.080 mmol, 80% yield, 96/4 er [determined by HPLC, Chiralcel AD-H, hexane/isopropanol = 97/3, 1 mL/min,  $\lambda$  = 220 nm, t (minor) = 35.17 min, t (major) = 37.67 min]).

$[\alpha]_D^{25}$  = -17.8 (c = 1.0,  $\text{CHCl}_3$ );  $^1\text{H NMR}$  (400 MHz,  $\text{CDCl}_3$ )  $\delta$  = 8.04 – 7.97 (m, 1H), 7.78 (d,  $J$  = 8.4 Hz, 2H), 7.69 – 7.65 (m, 1H), 7.38 – 7.30 (m, 2H), 7.27 (d,  $J$  = 7.7, 2H), 3.56 (dd,  $J$  = 14.5, 6.2 Hz, 1H), 3.53 – 3.46 (m, 1H), 3.38 (dd,  $J$  = 14.5, 7.2 Hz, 1H), 2.61 – 2.46 (m, 2H), 2.45 – 2.34 (m+s, 5H), 2.00 – 1.89 (m, 1H), 1.93 (t,  $J$  = 2.6 Hz, 1H), 1.80 – 1.71 (m, 1H), 1.58 (dq,  $J$  = 14.7, 7.2, 1.8 Hz, 2H), 0.93 (t,  $J$  = 7.3 Hz, 3H);  $^{13}\text{C NMR}$  (101 MHz,  $\text{CDCl}_3$ )  $\delta$  = 152.5, 146.1, 142.1, 135.5, 133.2, 130.4, 126.9, 125.9, 124.9, 120.2, 113.9, 83.9, 77.5, 77.2, 76.8, 68.9, 43.5, 36.9, 33.5, 33.2, 29.8, 23.3, 21.8, 16.3, 13.7; **IR** (film)  $\nu_{\text{max}}/\text{cm}^{-1}$ : 3298, 3058, 2960, 2923, 2852, 1596, 1540, 1451, 1376, 1189, 1047, 765, 666; **HRMS** (ESI+): calcd. for  $\text{C}_{23}\text{H}_{27}\text{O}_2\text{N}_2\text{S}_2$   $[\text{M}+\text{H}]^+$  427.1506, found 427.1508.

(R)-2-(2-Phenyl-2-(propylthio)ethyl)-1-tosyl-1H-benzo[d]imidazole (20)

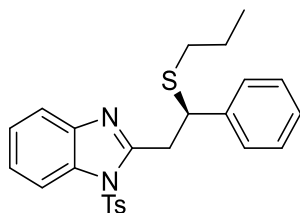

Compound **20** was synthesized according to a modified version of **GP II** from **Bz1** (37.4 mg) using catalyst **F**, 1-propanethiol (22.8 mg, 11  $\mu$ L) in THF (1.6 mL) and stirred at 22 °C. Amorphous white solid (Petrol 7/ 3 EtOAc) (39.1 mg, 0.087 mmol, 87% yield, 88/12 er [determined by HPLC, Chiralpak AD-H, hexane/isopropanol = 97/3, 1 mL/min,  $\lambda$  = 220 nm, t (major) = 42.23 min, t (minor) = 62.91 min]).

$[\alpha]_D^{25}$  = +5.8 (c = 0.79,  $\text{CHCl}_3$ );  **$^1\text{H NMR}$**  (400 MHz,  $\text{CDCl}_3$ )  $\delta$  7.93 – 7.90 (m, 1H), 7.68 – 7.66 (m, 2H), 7.65 – 7.58 (m, 1H), 7.43 – 7.36 (m, 2H), 7.33 – 7.11 (m, 7H), 4.71 (t,  $J$  = 7.5 Hz, 1H), 3.88 – 3.62 (m, 2H), 2.33 (s, 3H), 2.32 – 2.17 (m, 2H), 1.54 – 1.37 (m, 2H), 0.83 (t,  $J$  = 7.3 Hz, 3H);  **$^{13}\text{C NMR}$**  (101 MHz,  $\text{CDCl}_3$ )  $\delta$  152.1, 146.0, 142.1, 142.0, 135.5, 133.1, 130.3, 128.6, 128.0, 127.3, 126.9, 125.0, 124.8, 120.2, 113.8, 47.6, 37.2, 33.6, 22.7, 21.8, 13.6; **IR** (film)  $\nu_{\text{max}}/\text{cm}^{-1}$ : 2981, 1627, 1597, 1449, 1378, 1378, 1149, 1089, 1051, 669; **HRMS** (ESI +) calcd. for  $\text{C}_{25}\text{H}_{27}\text{O}_2\text{N}_2\text{S}_2$   $[\text{M}+\text{H}]^+$  451.1508, Found 451.1505.

(R)-2-(2-(4-Chlorophenyl)-2-(propylthio)ethyl)-1-tosyl-1H-benzo[d]imidazole (21)

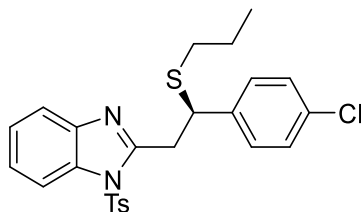

Compound **21** was synthesized according **GP III** from **Bz11** (40.9 mg) using catalyst **G**, 1-propanethiol (22.8 mg, 11  $\mu$ L) in THF (1.6 mL) and stirred at 22 °C. Clear oil (8 Pentane/ 2 EtOAc) (29.6 mg, 0.061 mmol, 61% yield, 91/9 er [determined by HPLC, Chiralpak AD-H, hexane/isopropanol = 95/5, 1 mL/min,  $\lambda$  = 220 nm, t (minor) = 28.80 min, t (major) = 22.55 min]).

$[\alpha]_D^{25}$  = +12.3 (c = 0.32,  $\text{CHCl}_3$ );  **$^1\text{H NMR}$**  (400 MHz,  $\text{CDCl}_3$ )  $\delta$  7.99 – 7.91 (m, 1H), 7.67 (d,  $J$  = 8.5 Hz, 2H), 7.67 – 7.59 (m, 1H), 7.38 – 7.28 (m, 4H), 7.27 – 7.17 (m, 4H), 4.70 (dd,  $J$  = 8.1, 7.0 Hz, 1H), 3.70 (qd,  $J$  = 15.9, 7.5 Hz, 2H), 2.38 (s, 3H), 2.31 (td,  $J$  = 7.8, 6.8 Hz, 2H), 1.66 – 1.40 (m, 2H), 0.88 (t,  $J$  = 7.3 Hz, 3H);  **$^{13}\text{C NMR}$**  (101 MHz,  $\text{CDCl}_3$ )  $\delta$  151.8, 146.1, 142.0, 140.6, 135.5, 133.1, 132.9, 130.4, 129.5, 128.7, 126.8, 125.1, 124.9, 120.2, 113.8, 46.9, 37.2, 33.7, 22.7, 21.8, 13.6; **HRMS** (APCI+): calcd. for  $\text{C}_{25}\text{H}_{26}\text{O}_2\text{N}_2\text{ClS}_2$   $[\text{M}+\text{H}]^+$  485.1118, found 485.1117.



(R)-2-(2-(4-Nitrophenyl)-2-(propylthio)ethyl)-1-tosyl-1H-benzo[d]imidazole (22)

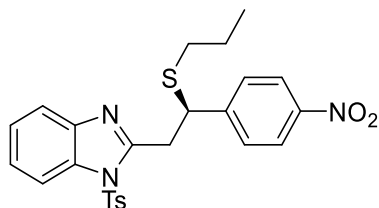

Compound **22** was synthesized according **GP III** from **Bz12** (41.9 mg) using catalyst **G**, 1-propanethiol (22.8 mg, 11  $\mu$ L) in THF (1.6 mL) and stirred at 22 °C. Yellow oil (8 Pentane/ 2 EtOAc) (33.4 mg, 0.067 mmol, 67% yield, 88/12 er [determined by HPLC, Chirapak AD-H, hexane/isopropanol = 80/20, 1 mL/min,  $\lambda$  = 220 nm, t (minor) = 12.69 min, t (major) = 16.93 min]).

$[\alpha]_D^{25}$  = +15.7 (c = 1.21, CHCl<sub>3</sub>); **<sup>1</sup>H NMR** (400 MHz, CDCl<sub>3</sub>)  $\delta$  8.10 – 8.08 (m, 2H), 8.01 – 7.95 (m, 1H), 7.76 – 7.70 (m, 2H), 7.67 – 7.61 (m, 1H), 7.60 – 7.55 (m, 2H), 7.34 (ddd,  $J$  = 7.0, 5.0, 1.7 Hz, 2H), 7.28 (dd,  $J$  = 8.9, 1.0 Hz, 2H), 4.83 (dd,  $J$  = 8.4, 6.8 Hz, 1H), 3.84 – 3.67 (m, 2H), 2.39 (s, 3H), 2.38 – 2.23 (m, 2H), 1.65 – 1.41 (m, 2H), 0.91 (t,  $J$  = 7.3 Hz, 3H); **<sup>13</sup>C NMR** (101 MHz, CDCl<sub>3</sub>)  $\delta$  151.1, 149.8, 147.1, 146.3, 141.8, 135.4, 133.1, 130.4, 129.0, 126.8, 125.3, 125.0, 123.8, 120.2, 113.8, 46.9, 36.8, 33.8, 22.6, 21.8, 13.5; **IR** (film)  $\nu_{\max}/\text{cm}^{-1}$ : 2962, 2929, 1596, 1519, 1451, 1371, 1349, 1189, 1049, 745, 668; **HRMS** (APCI+): calcd. for C<sub>25</sub>H<sub>26</sub>O<sub>4</sub>N<sub>3</sub>S<sub>2</sub> [M+H]<sup>+</sup> 496.1359, found 496.1356.

(R)-2-(2-(3-Chlorophenyl)-2-(propylthio)ethyl)-1-tosyl-1H-benzo[d]imidazole (23)

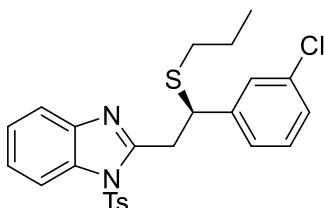

Compound **23** was synthesized according **GP III** from **Bz13** (40.1 mg) using catalyst **G**, 1-propanethiol (22.8 mg, 11  $\mu$ L) in THF (1.6 mL) and stirred at 22 °C. Clear oil (7 Pentane/ 3 EtOAc) (29.9 mg, 0.062 mmol, 62% yield, 93/7 er [determined by HPLC, Chiralpak AD-H hexane/isopropanol = 90/10, 1 mL/min,  $\lambda$  = 220 nm, t (minor) = 17.19 min, t (major) = 11.32 min]).

$[\alpha]_D^{25}$  = +17.1 (c = 0.66, CHCl<sub>3</sub>); **<sup>1</sup>H NMR** (400 MHz, CDCl<sub>3</sub>)  $\delta$  8.00 – 7.94 (m, 1H), 7.75 – 7.69 (m, 2H), 7.67 – 7.61 (m, 1H), 7.42 – 7.38 (m, 1H), 7.34 – 7.28 (m, 3H), 7.25 (m, 2H), 7.22 – 7.10 (m, 2H), 4.70 (t,  $J$  = 7.5 Hz, 1H), 3.71 (t,  $J$  = 7.6 Hz, 2H), 2.37 (s, 3H), 2.34 – 2.20 (m, 2H), 1.55 – 1.44 (m, 2H), 0.87 (t,  $J$  = 7.5 Hz, 3H); **<sup>13</sup>C NMR** (101 MHz, CDCl<sub>3</sub>)  $\delta$  151.7, 146.1, 144.3, 142.0, 135.5, 134.4, 133.2, 130.4, 129.8, 128.1, 127.6, 126.8, 126.4, 125.1, 124.8, 120.2, 113.8, 47.0, 37.1, 33.7, 22.6, 21.8, 13.6. **IR** (film)  $\nu_{\max}/\text{cm}^{-1}$ : 3058, 2961, 1596, 1452, 1377, 1189, 1089, 1048, 765, 668; **HRMS** (APCI+): calcd. for C<sub>25</sub>H<sub>26</sub>O<sub>2</sub>N<sub>2</sub>ClS<sub>2</sub> [M+H]<sup>+</sup> 485.1118, found 485.1118.

(R)-2-(2-(Propylthio)-2-(6-(trifluoromethyl)pyridin-3-yl)ethyl)-1-tosyl-1H-benzo[d]imidazole (24)

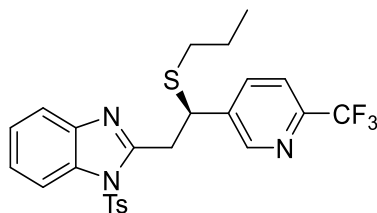

Compound **24** was synthesized according **GP III** from **Bz14** (44.3 mg) using catalyst **G**, 1-propanethiol (22.8 mg, 11  $\mu$ L) in THF (1.6 mL) and stirred at 22 °C. Clear oil (8 Pentane/ 2 EtOAc) (38.4 mg, 0.074 mmol, 74% yield, 90/10 er [determined by HPLC, Chiralpak IA, hexane/isopropanol = gradient 995/005 to 70/30, 1 mL/min,  $\lambda$  = 220 nm, t (minor) = 41.05 min, t (major) = 42.29 min]).

$[\alpha]_D^{25}$  = +13.2 (c = 0.54,  $\text{CHCl}_3$ );  $^1\text{H NMR}$  (400 MHz,  $\text{CDCl}_3$ )  $\delta$  8.74 (d,  $J$  = 2.1 Hz, 1H), 7.99 (ddd,  $J$  = 7.9, 1.9, 1.0 Hz, 2H), 7.75 – 7.68 (m, 2H), 7.66 – 7.59 (m, 2H), 7.35 (ddd,  $J$  = 7.0, 4.8, 1.7 Hz, 2H), 7.28 (dd,  $J$  = 8.6, 1.0 Hz, 2H), 4.83 (dd,  $J$  = 8.3, 6.8 Hz, 1H), 3.78 (dd,  $J$  = 7.6, 4.0 Hz, 2H), 2.40 (s, 3H), 2.39 – 2.26 (m, 2H), 1.65 – 1.47 (m, 2H), 0.93 (t,  $J$  = 7.4 Hz, 3H);  $^{13}\text{C NMR}$  (101 MHz,  $\text{CDCl}_3$ )  $\delta$  150.8, 150.1, 147.0 (q,  $J$  = 34.6 Hz), 146.4, 141.8, 141.3, 136.8, 135.4, 133.1, 130.5, 126.7, 125.4, 125.0, 120.4 (d,  $J$  = 2.6 Hz), 120.2, 113.8, 44.3, 36.8, 33.8, 22.6, 21.8, 13.5;  $^{19}\text{F NMR}$  (376 MHz,  $\text{CDCl}_3$ )  $\delta$  -67.8; **IR** (film)  $\nu_{\text{max}}/\text{cm}^{-1}$ : 3057, 2963, 2931, 1452, 1378, 1337, 1174, 1137, 1088, 1051, 745, 669; **HRMS** (APCI+): calcd. for  $\text{C}_{25}\text{H}_{25}\text{O}_2\text{N}_3\text{F}_3\text{S}_2$   $[\text{M}+\text{H}]^+$  520.1334, found 520.1333.

## 7/ Cleavage of *N*-Ts group (**25**)

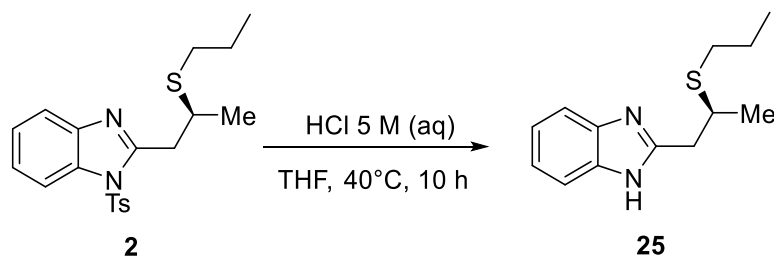

To a solution of **2** (50 mg, 0.129 mmol) in THF (1 mL) was added 5 M aq. HCl (1 mL). The mixture was stirred at 40°C for 10 h. The reaction was quenched with a solution of saturated NaHCO<sub>3</sub> and the aqueous phase extracted twice with EtOAc (5 mL). The combined organics were washed with brine, dried over MgSO<sub>4</sub> and concentrated under vacuum. The residue was purified by flash chromatography with pure EtOAc affording product **25** as a white solid (30.2 mg, 0.129 mmol, 100% yield and 95.5/4.5 er) [determined by HPLC, Chiralcel OD-H, hexane/isopropanol = 95/5, 1 mL/min,  $\lambda$  = 220 nm, t (minor) = 33.17 min, t (major) = 41.12 min].

**Mp** : 94°C (from EtOAc);  $[\alpha]_D^{25}$  = -38.9 (c = 0.4, CHCl<sub>3</sub>); **<sup>1</sup>H NMR** (400 MHz, MeOD)  $\delta$  = 7.48 (dd, *J* = 6.1, 3.2 Hz, 2H), 7.18 (dd, *J* = 6.1, 3.2 Hz, 2H), 4.87 (s, 2H), 3.34 – 3.23 (m, 2H), 3.14 (dd, *J* = 14.3, 6.7 Hz, 1H), 2.97 (dd, *J* = 14.4, 8.0 Hz, 1H), 2.48 (td, *J* = 7.2, 3.5 Hz, 2H), 1.55 (h, *J* = 7.3 Hz, 2H), 1.27 (d, *J* = 6.8 Hz, 3H), 0.91 (t, *J* = 7.3 Hz, 3H); **<sup>13</sup>C NMR** (101 MHz, MeOD)  $\delta$  = 152.4, 121.3, 113.4, 38.2, 36.2, 31.6, 22.1, 19.8, 11.7; **IR** (film)  $\nu_{\text{max}}/\text{cm}^{-1}$ : 3054, 2959, 2869, 1538, 1453, 1437, 1376, 1272, 1026, 742; **HRMS** (ESI+): calcd. for C<sub>13</sub>H<sub>19</sub>N<sub>2</sub>S [M+H]<sup>+</sup> 235.1263, found 235.1263.

## 8/ Oxidation of sulfur (26)

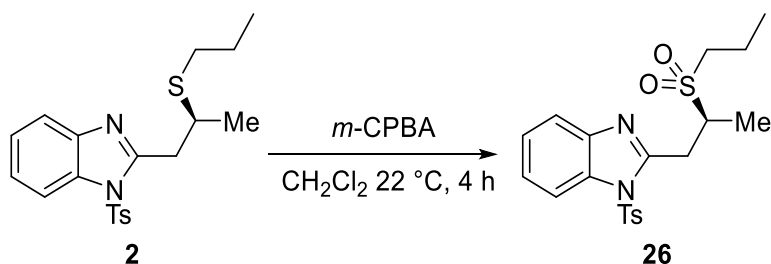

To a solution of **2** (40 mg, 0.103 mmol) in  $\text{CH}_2\text{Cl}_2$  (1 mL) at 22 °C was added *m*-CPBA (77% in water) (53 mg, 0.236 mmol). The mixture was stirred for 4h. The reaction was diluted with  $\text{CH}_2\text{Cl}_2$  (5 ml) and quenched with a solution of saturated  $\text{Na}_2\text{S}_2\text{O}_3$ . The organic layer was washed with a solution of saturated  $\text{NaHCO}_3$ , dried over  $\text{MgSO}_4$  and concentrated under reduced pressure. The residue was purified by flash chromatography on silica gel (6 Et<sub>2</sub>O/ 4 pentane) affording the pure compound **26** as a colorless oil (41.1 mg, 0.098 mmol, 95% yield and 95/5 er [determined by HPLC, Chiralcel AD-H, hexane/ isopropanol = 90/10, 1 mL/min,  $\lambda$  = 220 nm, t (minor) = 37.12 min, t (major) = 49.98 min]).

$[\alpha]_{\text{D}}^{25} = -1.8$  (c = 1.7,  $\text{CHCl}_3$ ); **<sup>1</sup>H NMR** (400 MHz,  $\text{CDCl}_3$ )  $\delta$  = 8.06 – 8.01 (m, 1H), 7.82 (d,  $J$  = 8.4 Hz, 2H), 7.68 – 7.62 (m, 1H), 7.41 – 7.32 (m, 2H), 7.30 (d,  $J$  = 7.8 Hz, 2H), 3.97 (dq,  $J$  = 9.6, 6.9, 3.8 Hz, 1H), 3.86 (dd,  $J$  = 16.5, 3.8 Hz, 1H), 3.37 (dd,  $J$  = 16.5, 9.6 Hz, 1H), 3.06 – 2.92 (m, 2H), 2.38 (s, 3H), 2.01 – 1.84 (m, 2H), 1.47 (d,  $J$  = 6.9 Hz, 3H), 1.07 (t,  $J$  = 7.5 Hz, 3H); **<sup>13</sup>C NMR** (101 MHz,  $\text{CDCl}_3$ )  $\delta$  = 150.6, 146.5, 141.8, 135.1, 133.3, 130.6, 127.0, 125.5, 125.0, 120.1, 113.8, 55.3, 52.4, 30.0, 21.8, 15.6, 13.6, 13.4; **IR** (film)  $\nu_{\text{max}}/\text{cm}^{-1}$ : 2971, 1596, 1541; 1452, 1376, 1292, 1170, 1122, 1088, 746, 668; **HRMS** (ESI+): calcd. for  $\text{C}_{20}\text{H}_{25}\text{O}_4\text{N}_2\text{S}_2$   $[\text{M}+\text{H}]^+$  421.1250, found 421.1240.

## 9/ Removal of *para*-Methoxybenzyl group (**27**)

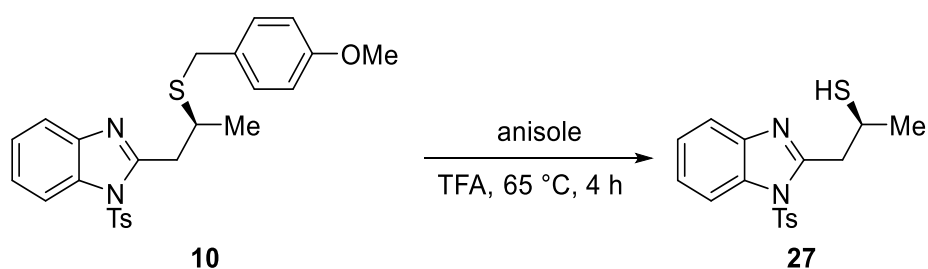

A procedure from the literature<sup>9</sup> was modified as follows. To a solution of **10** (45 mg, 0.095 mmol, 91/9 er) in TFA (621  $\mu$ L) was added anisole (72  $\mu$ L, 0.66 mmol) and was stirred at 65°C for 4 hrs. Volatiles were then removed under a stream of N<sub>2</sub> and the resulting crude was dissolved in Et<sub>2</sub>O (1.6 mL) and passed through a plug of K<sub>2</sub>CO<sub>3</sub>. The resulting solution was loaded directly onto silica gel (7 Petrol/ 3 EtOAc) to afford pure **27** as a clear oil (16.1 mg, 0.048 mmol, 50% yield, 91/9 er [determined by HPLC, Chiralcel AD-H, hexane/ isopropanol = 95/5, 1 mL/min,  $\lambda$  = 220 nm, t (minor) = 19.00 min, t (major) = 22.53 min]).

$[\alpha]_D^{25} = +3.9$  (c = 1.0, CHCl<sub>3</sub>); **<sup>1</sup>H NMR** (400 MHz, CDCl<sub>3</sub>)  $\delta$  8.03 – 7.98 (m, 1H), 7.82 – 7.77 (m, 2H), 7.71 – 7.65 (m, 1H), 7.39 – 7.31 (m, 2H), 7.30 – 7.27 (m, 2H), 3.79 – 3.68 (m, 1H), 3.51 – 3.37 (m, 2H), 2.38 (s, 3H), 2.04 (dd,  $J = 6.5, 0.5$  Hz, 1H), 1.47 (dd,  $J = 6.5, 0.5$  Hz, 3H); **<sup>13</sup>C NMR** (101 MHz, CDCl<sub>3</sub>)  $\delta$  152.6, 146.2, 142.1, 135.5, 133.1, 130.4, 126.9, 125.2, 124.9, 120.2, 113.8, 41.5, 33.5, 24.7, 21.8; **IR** (film)  $\nu_{\max}/\text{cm}^{-1}$ : 2968, 2923, 1452, 1378, 1254, 1232, 1170, 1089, 1048, 746, 668; **HRMS** (APCI+): calcd. for C<sub>17</sub>H<sub>19</sub>O<sub>2</sub>N<sub>2</sub>S<sub>2</sub> [M+H]<sup>+</sup> 347.0883, found 347.0880.

<sup>9</sup> Y. Liu, B. Sun, B. Wang, M. Wakem, and L. Deng, *J. Am. Chem. Soc.*, 2009, **131**, 418.

## 10/ Introduction of a 4-Me group (29)

### (E)-4-methyl-2-(prop-1-en-1-yl)-1-tosyl-1H-benzo[d]imidazole (28)

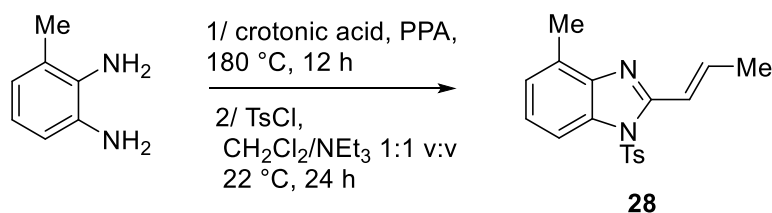

To a mixture of crotonic acid (2.68 g, 30.0 mmol) in polyphosphoric acid (12 g) was added 3-methylbenzene-1,2-diamine (3.66 g, 30.0 mmol). The reaction was heated at 180 °C for 12 h. The mixture was cooled down to 22 °C and poured carefully onto a saturated solution of NaHCO<sub>3</sub>. Solid NaHCO<sub>3</sub> was added until neutral pH was obtained. The solution was diluted with EtOAc and water then stirred vigorously for 10 min. The aqueous phase was extracted twice with EtOAc and the combined organic phase were washed with brine, dried over MgSO<sub>4</sub> and concentrated under vacuum affording 4.06 g of crude light brown solid.

The crude residue (2.49 g, 14.5 mmol) was dissolved in CH<sub>2</sub>Cl<sub>2</sub> (35.0 mL), NEt<sub>3</sub> (35.0 mL) was added then TsCl (3.01 g, 16.0 mmol). The mixture was stirred for 24h at 22 °C. The solvent was removed under vacuum and the crude was purified by flash chromatography on silica gel (CH<sub>2</sub>Cl<sub>2</sub>). A subsequent trituration in pentane afforded pure (E)-4-methyl-2-(prop-1-en-1-yl)-1-tosyl-1H-benzo[d]imidazole (3.76 g, 11.5 mmol, 79% yield) as a colourless solid.

**Mp** : 178 °C (from CH<sub>2</sub>Cl<sub>2</sub>); **<sup>1</sup>H NMR** (500 MHz, CDCl<sub>3</sub>) δ 7.88 (d, *J* = 8.2 Hz, 1H), 7.76 (d, *J* = 1.7 Hz, 2H), 7.26 – 7.19 (m, 4H), 7.16 – 7.06 (m, 2H), 2.59 (s, 3H), 2.35 (s, 3H), 2.05 (dd, *J* = 6.8, 1.7 Hz, 3H); **<sup>13</sup>C NMR** (126 MHz, CDCl<sub>3</sub>) δ 150.3, 145.7, 141.7, 139.1, 135.5, 132.6, 130.0, 129.9, 126.8, 125.5, 124.6, 118.8, 111.3, 21.6, 19.0, 16.5; **IR** (film)  $\nu_{\max}/\text{cm}^{-1}$ : 2980, 1597, 1517, 1445, 1374, 1339, 1203, 1177, 1161, 1092, 965, 830, 812, 777, 667; **HRMS** (ESI+): calcd. for C<sub>18</sub>H<sub>19</sub>O<sub>2</sub>N<sub>2</sub>S [M+H]<sup>+</sup> 327.1162, found 327.1160.

### 4-methyl-2-(2-(propylthio)propyl)-1-tosyl-1H-benzo[d]imidazole (29)

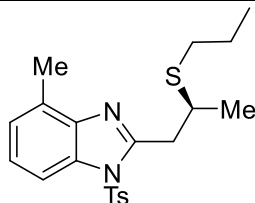

Compound **29** was synthesized according to a modified version of **GPII** from **28** (31.2 mg) using catalyst **G**, 3 equivalents of 1-propanethiol (22.8 mg, 0.3 mmol, 28  $\mu$ L) and stirred at 22 °C in 0.6 mL of THF. Clear viscous oil (7 Petrol/ 3 EtOAc) (24.1 mg, 0.060 mmol, 60% yield, 50/50 er [determined by HPLC, Chiralpak IC, hexane/isopropanol = 99/1, 1 mL/min,  $\lambda$  = 220 nm, t (major) = 16.69 min, t (minor) = 19.91 min])

**<sup>1</sup>H NMR** (400 MHz, CDCl<sub>3</sub>) δ 7.82 (dt, *J* = 8.2, 0.9 Hz, 1H), 7.80 – 7.72 (m, 2H), 7.29 – 7.23 (m, 3H), 7.21 (d, *J* = 7.9 Hz, 1H), 7.12 (dt, *J* = 7.5, 1.0 Hz, 1H), 3.65 – 3.47 (m, 2H), 3.34 – 3.22 (m, 1H), 2.67 – 2.48 (s + m, 5H), 2.37 (s, 3H), 1.63 (h, *J* = 7.2 Hz, 2H), 1.35 (d, *J* = 6.6 Hz, 3H), 0.97 (t, *J* = 7.3 Hz, 3H); **<sup>13</sup>C NMR** (101 MHz, CDCl<sub>3</sub>) δ 152.0, 145.9, 141.3, 135.8, 132.9, 130.3, 130.2, 126.9, 125.4, 124.8, 111.3, 38.6, 38.1, 33.0, 23.3, 21.8, 21.4, 16.6, 13.7; **IR** (film)  $\nu_{\max}/\text{cm}^{-1}$ : 2962, 2925, 2871, 1374, 1190, 1186, 1103, 1012, 812, 778, 766, 703, 678, 648; **HRMS** (ESI+): calcd. for C<sub>21</sub>H<sub>27</sub>O<sub>2</sub>N<sub>2</sub>S<sub>2</sub> [M+H]<sup>+</sup> 403.1509, found 403.1506.



# 11/ <sup>1</sup>H and <sup>13</sup>C NMR spectra

## Spectra for **Bz5**:

<sup>1</sup>H NMR:

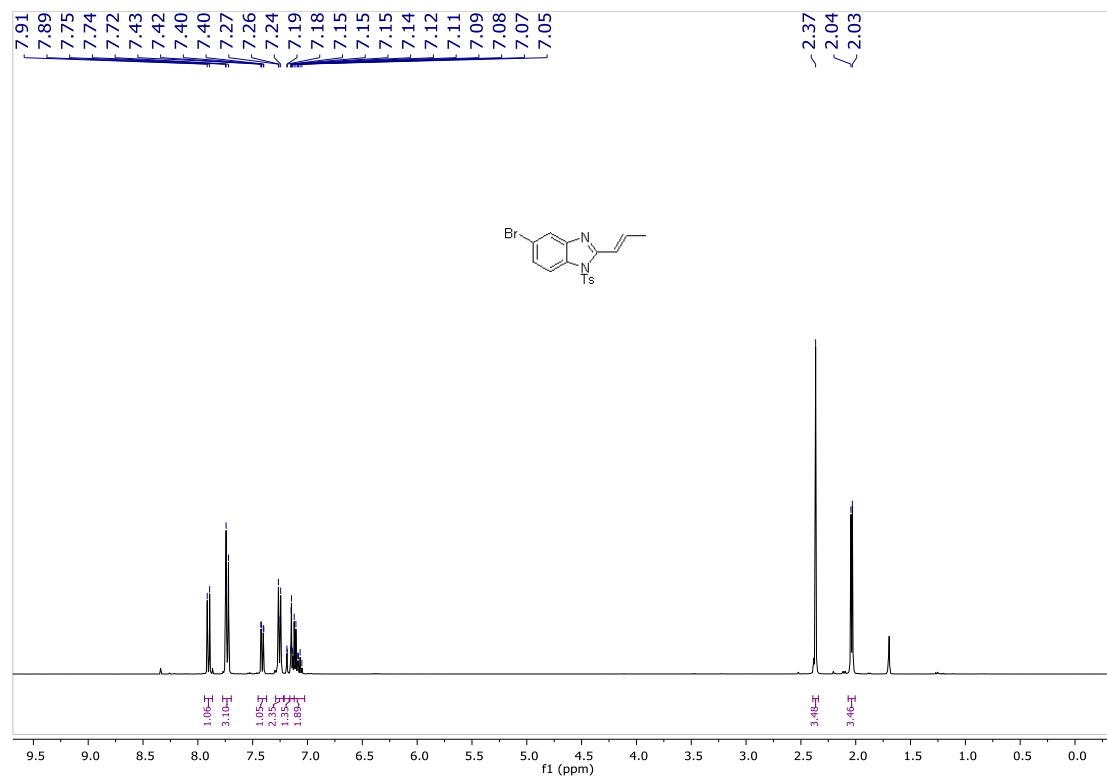

<sup>13</sup>C NMR:

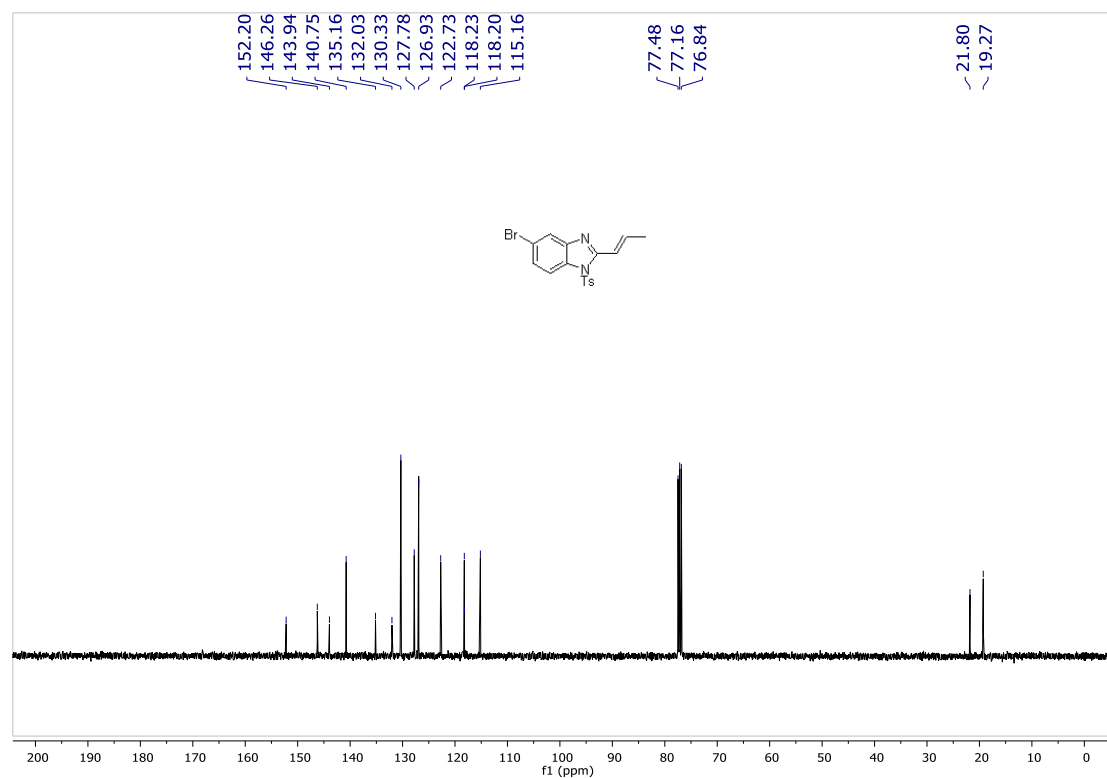



### Spectra for **Bz6**:

$^1\text{H}$  NMR:

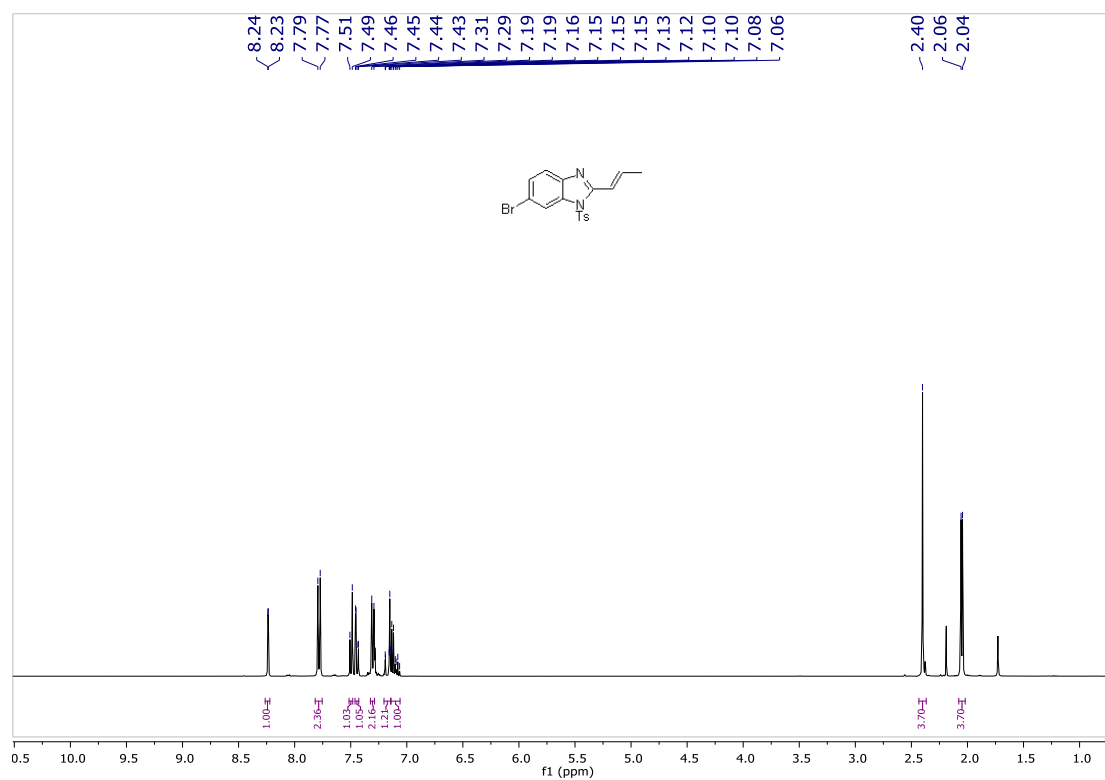

$^{13}\text{C}$  NMR:

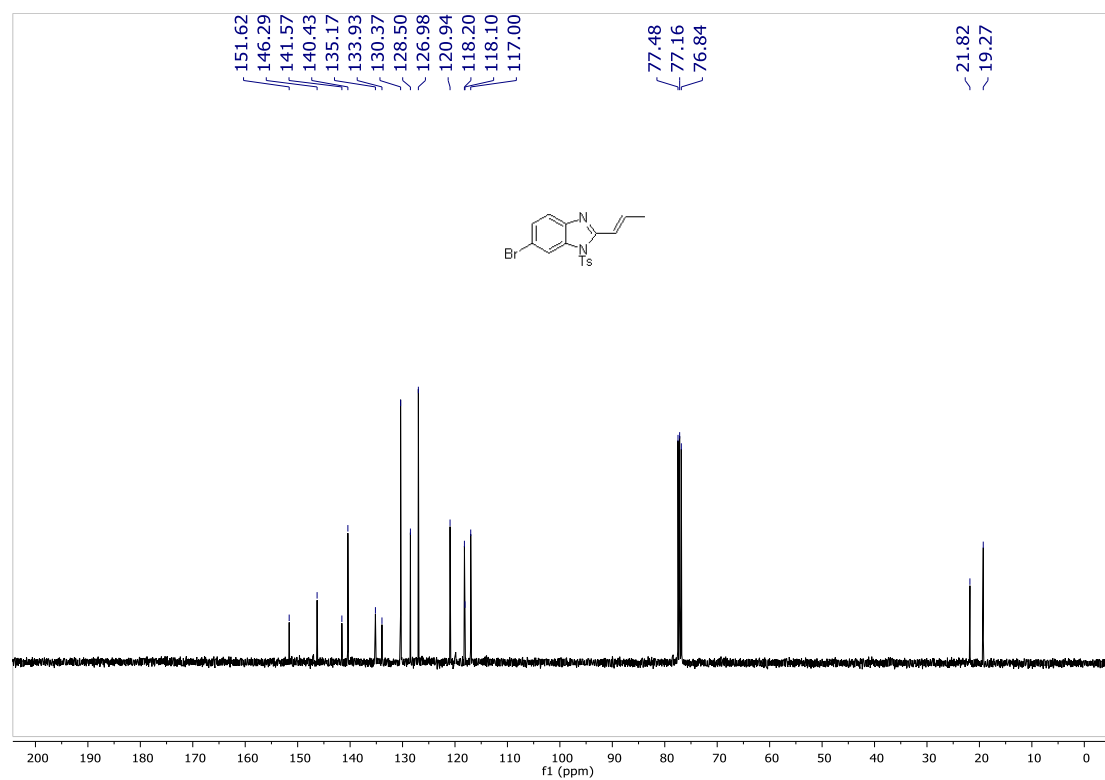

### Spectra for **Bz7**:

<sup>1</sup>H NMR:

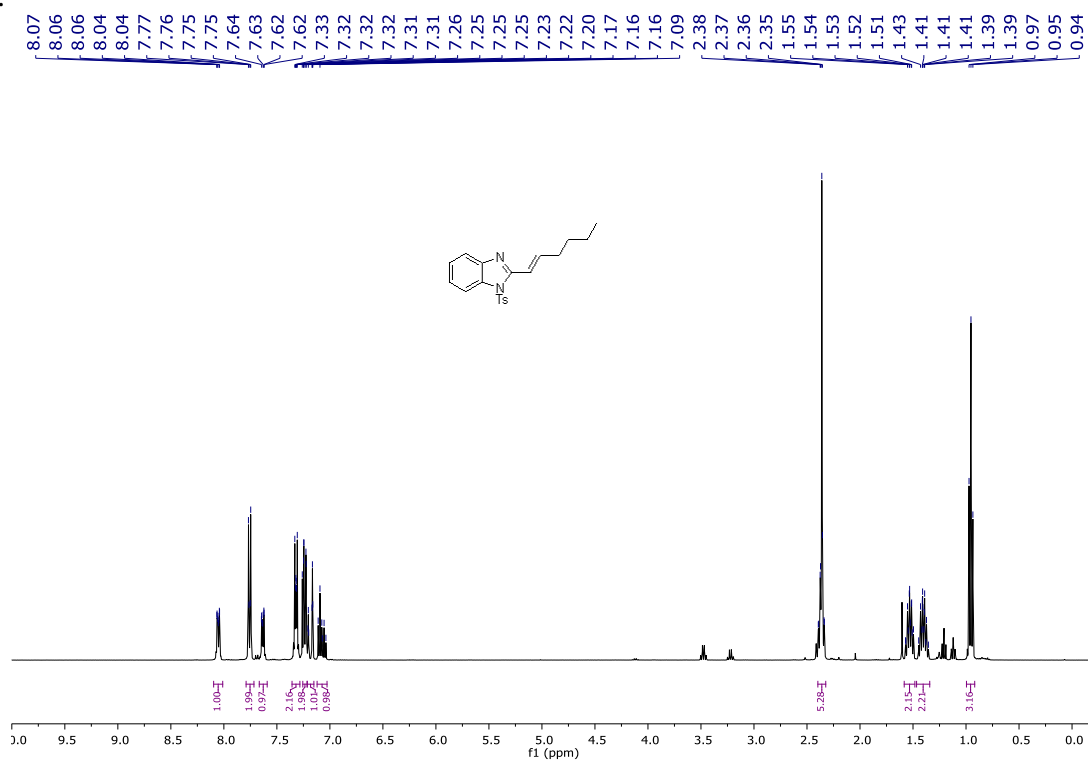

<sup>13</sup>C NMR:

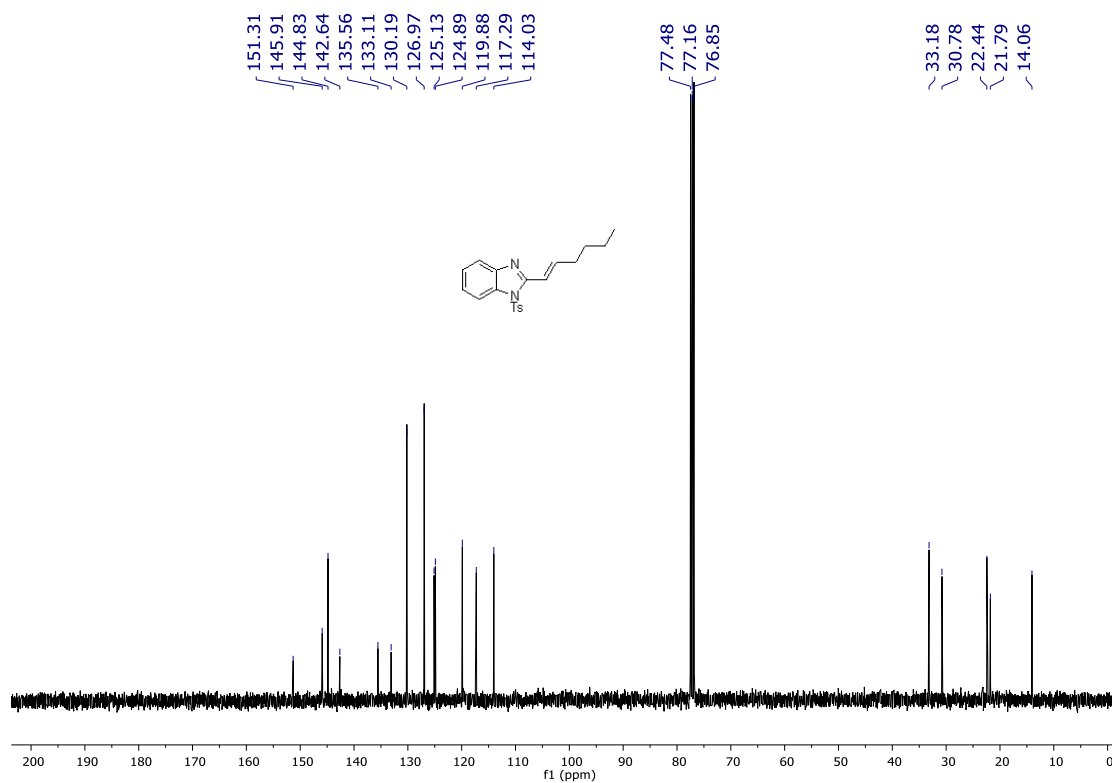

### Spectra for **Bz8**:

$^1\text{H}$  NMR:

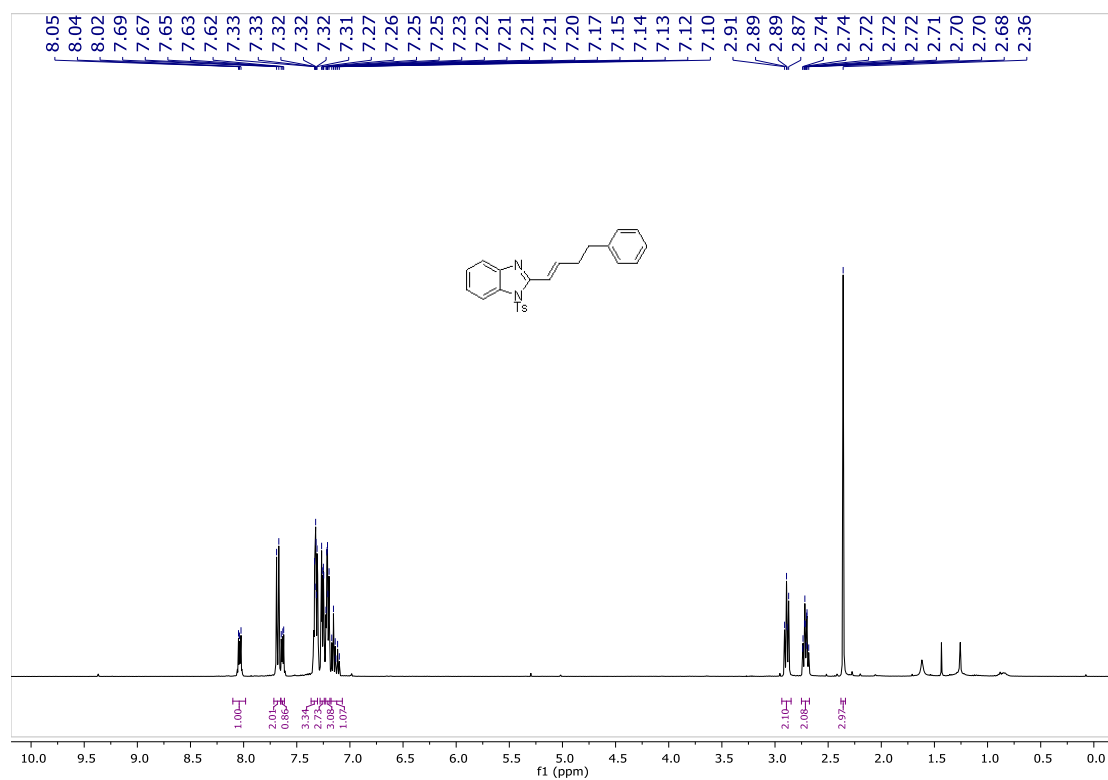

$^{13}\text{C}$  NMR:

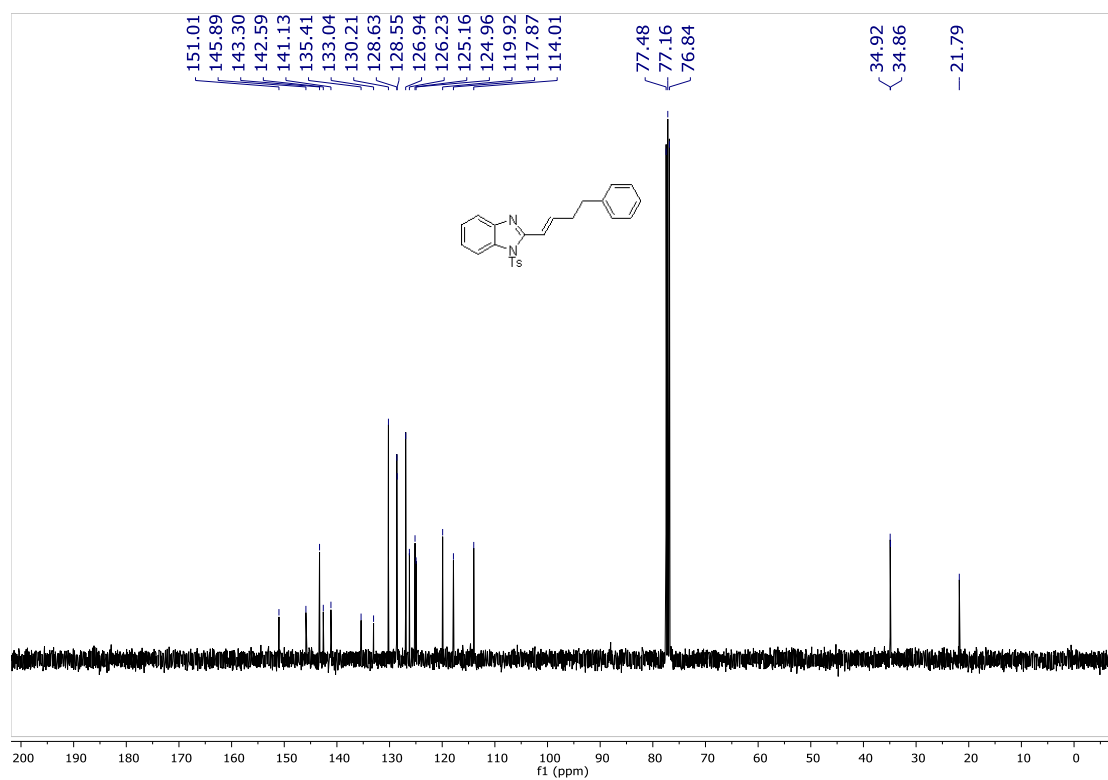

# Spectra for Bz9:

<sup>1</sup>H NMR:

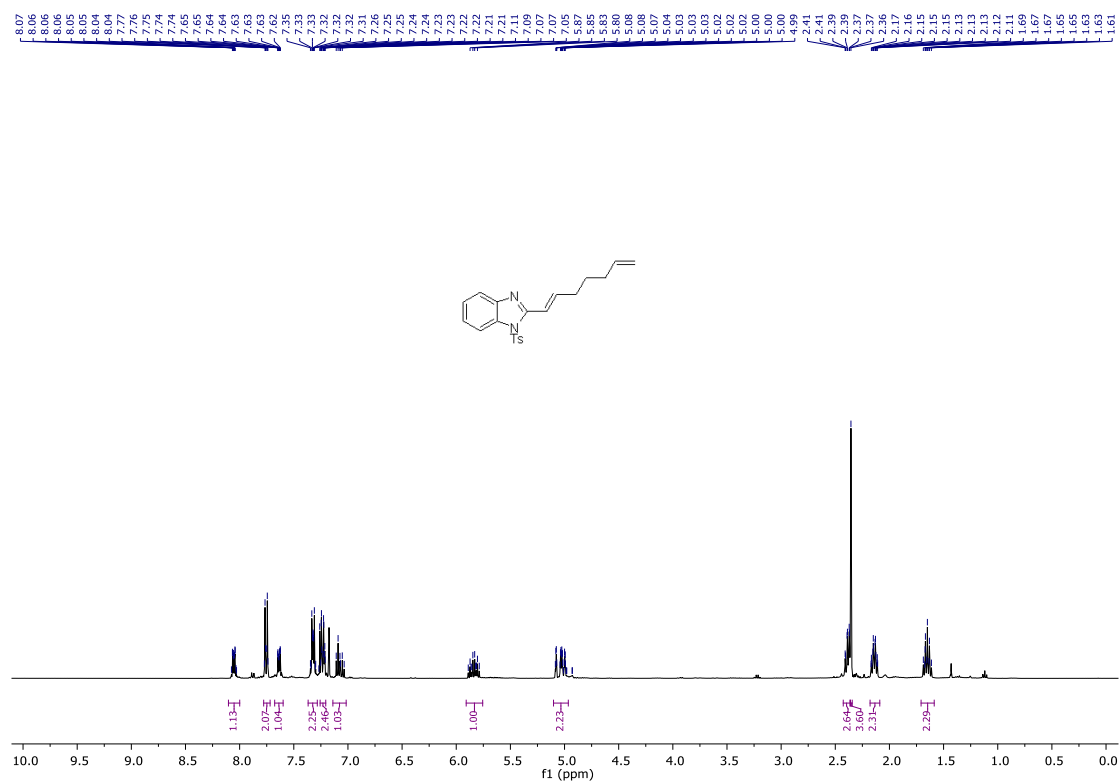

<sup>13</sup>C NMR:

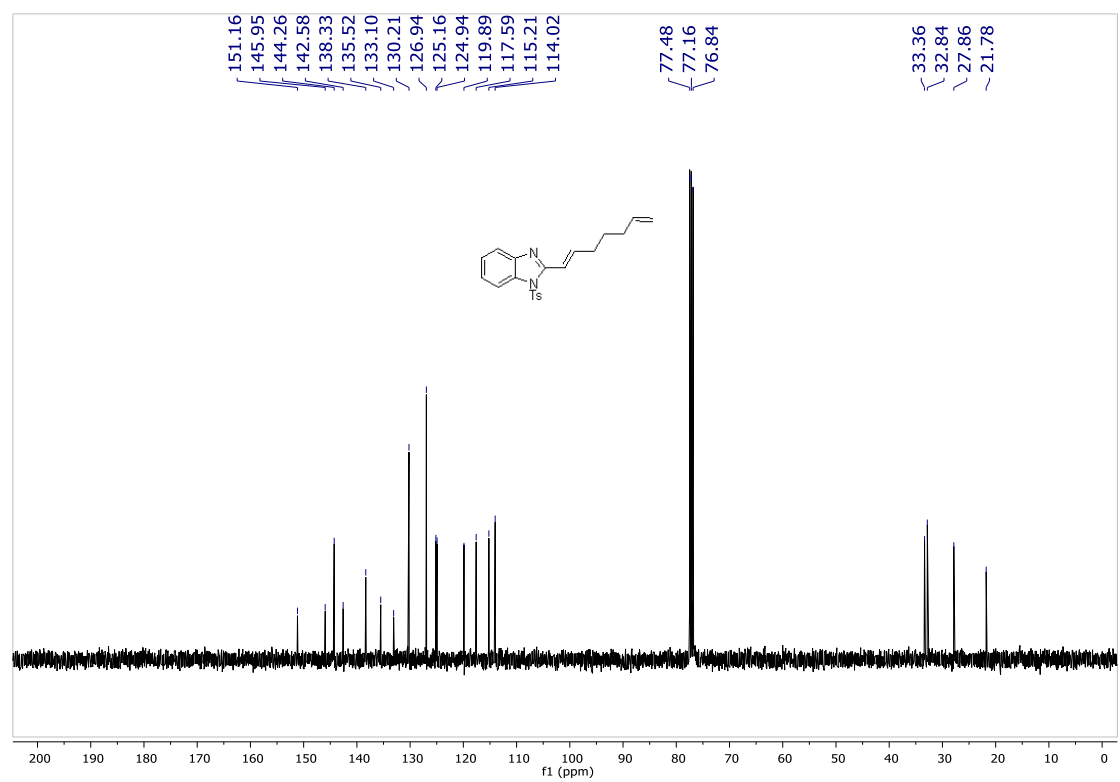

### Spectra for **Bz10**:

$^1\text{H}$  NMR:

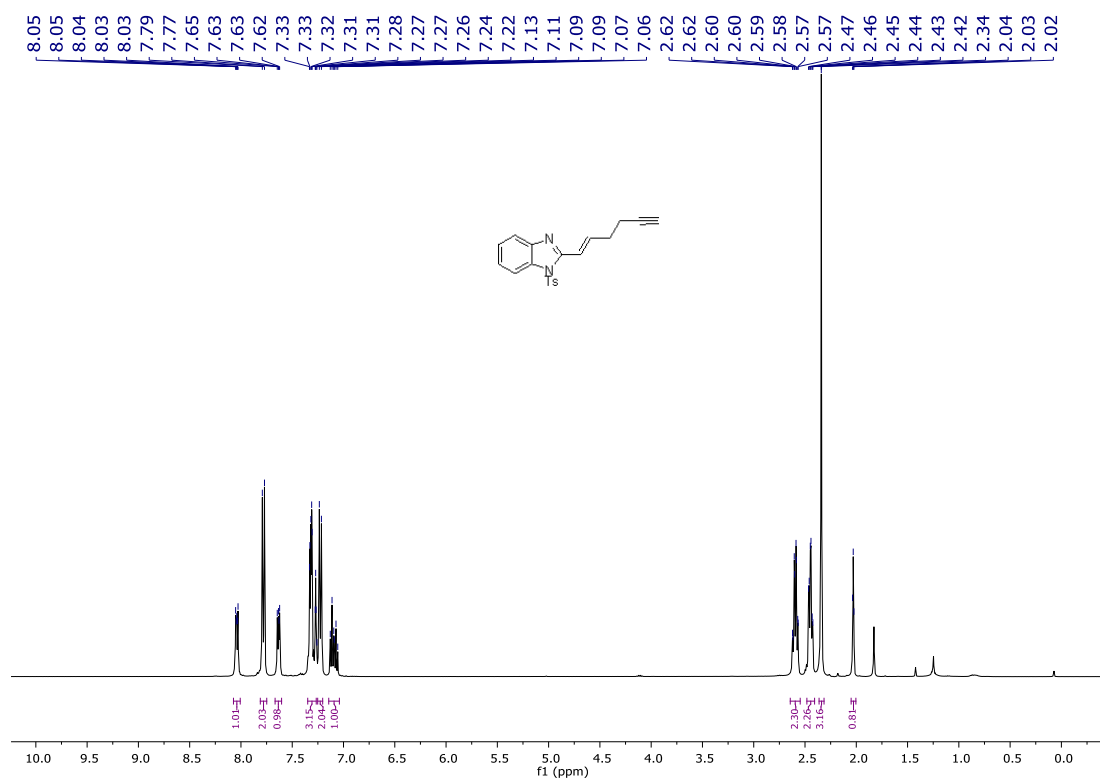

$^{13}\text{C}$  NMR:

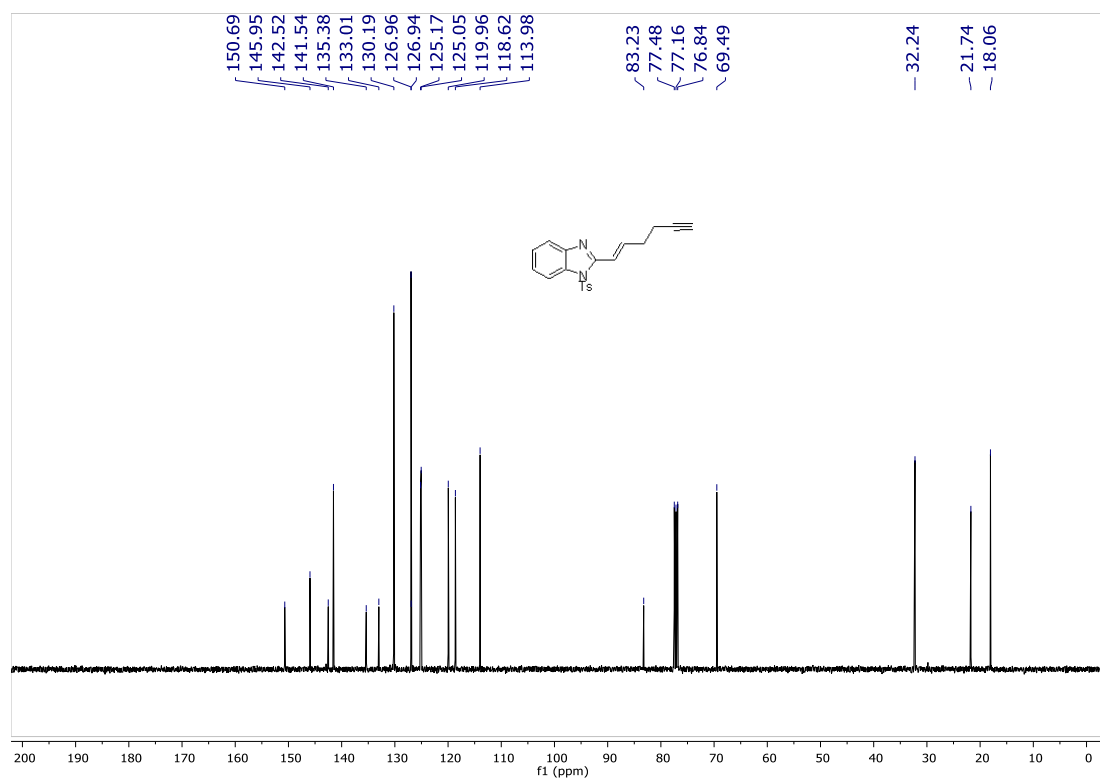

# Spectra for **Bz11**:

<sup>1</sup>H NMR:

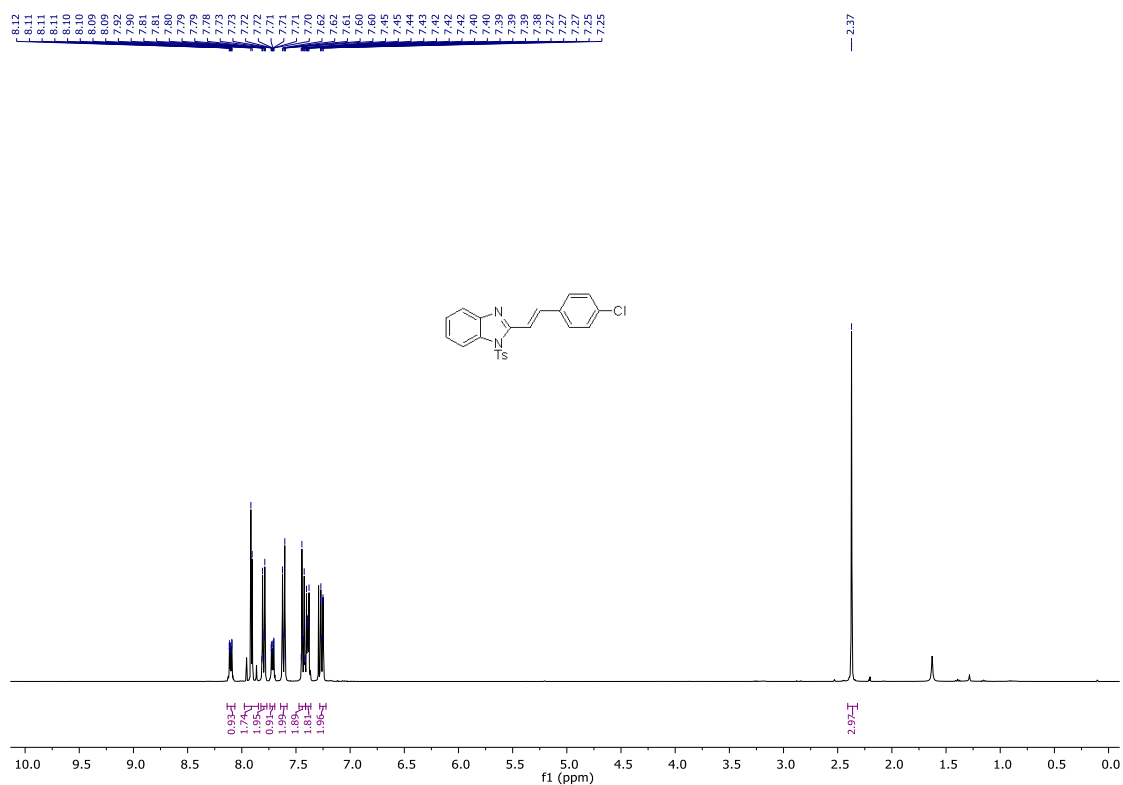

<sup>13</sup>C NMR:

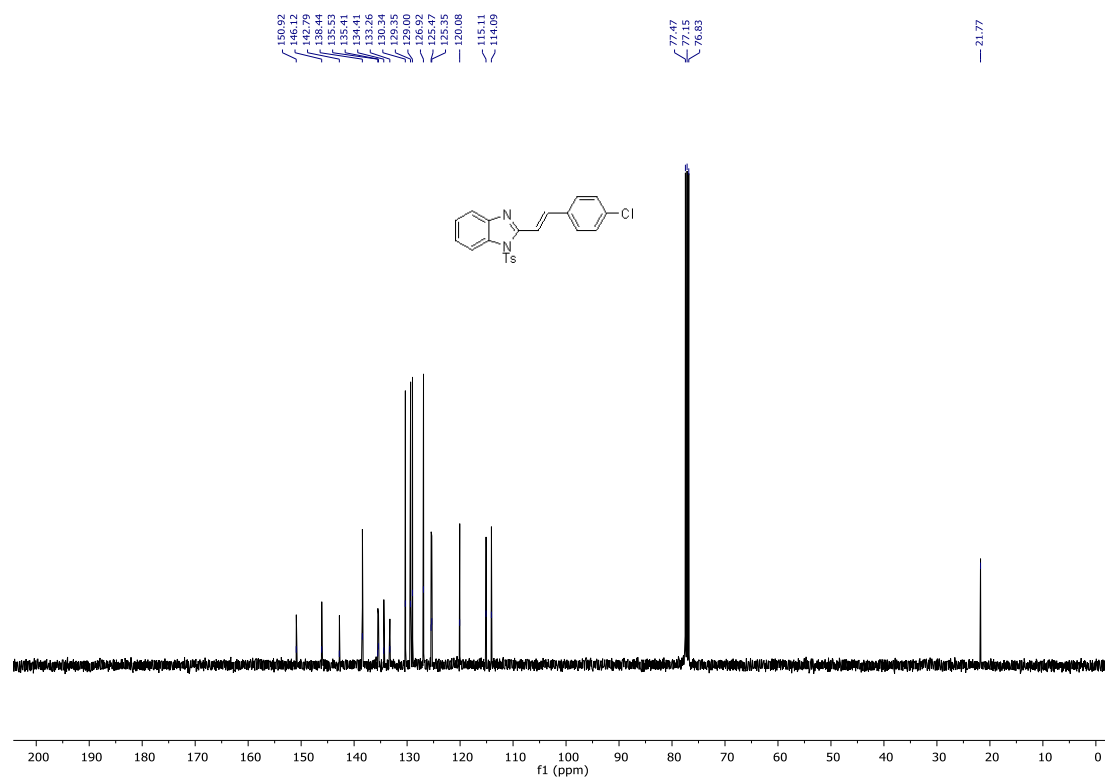

**Spectra for Bz12:**

<sup>1</sup>H NMR:

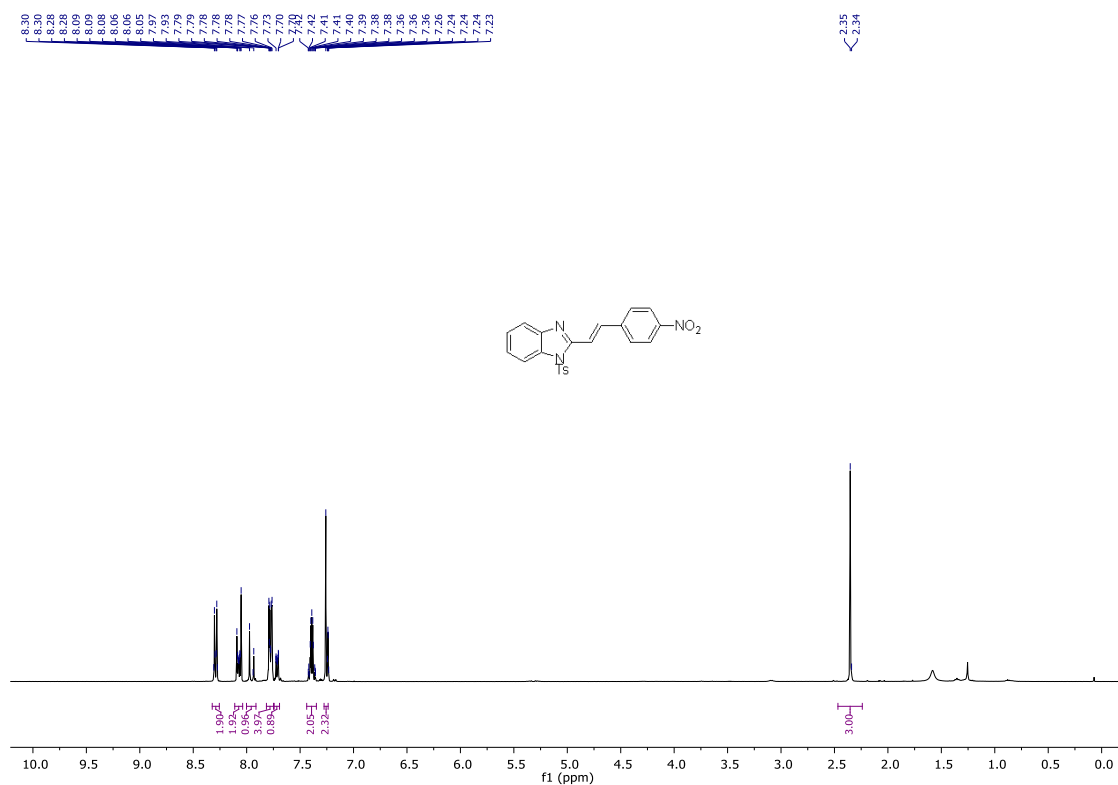

<sup>13</sup>C NMR:

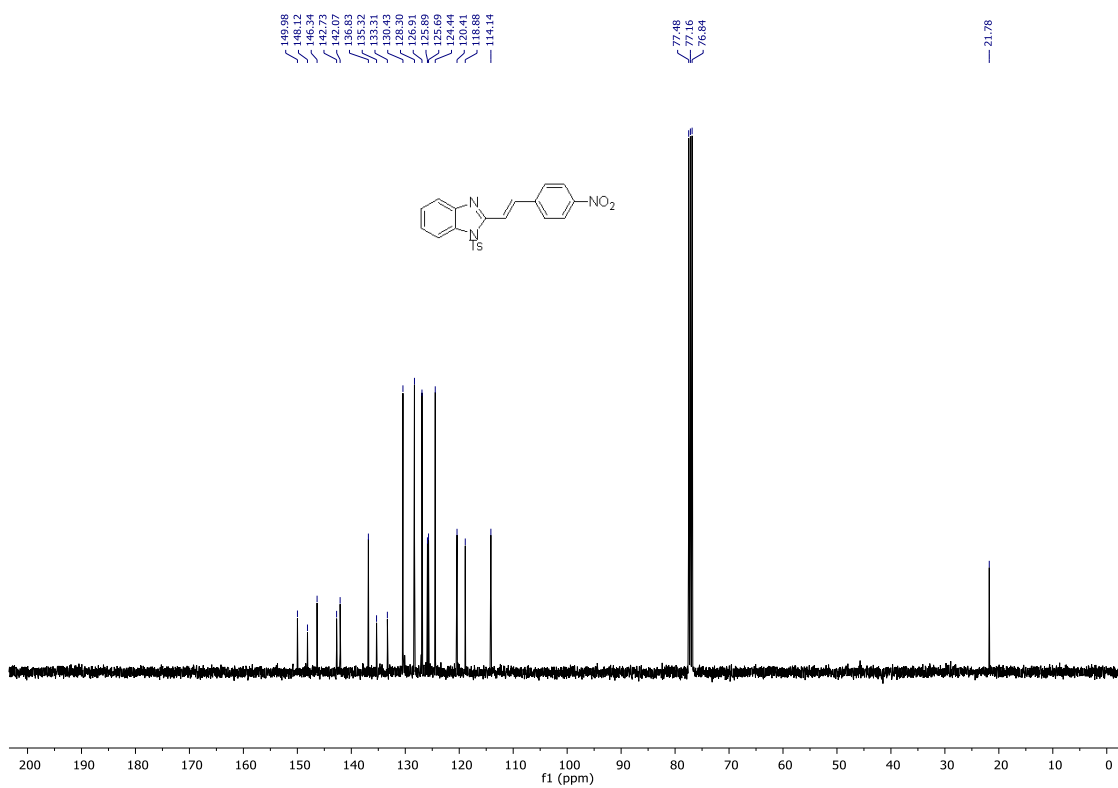

# Spectra for **Bz13**:

<sup>1</sup>H NMR:

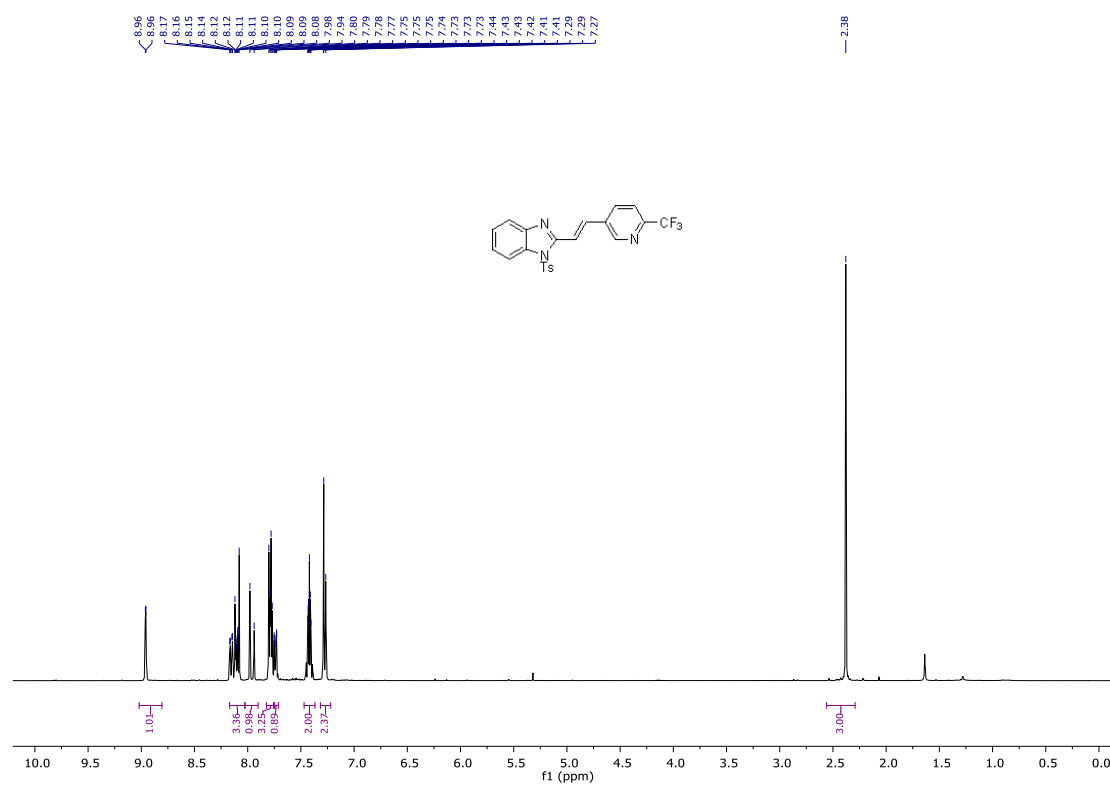

<sup>13</sup>C NMR:

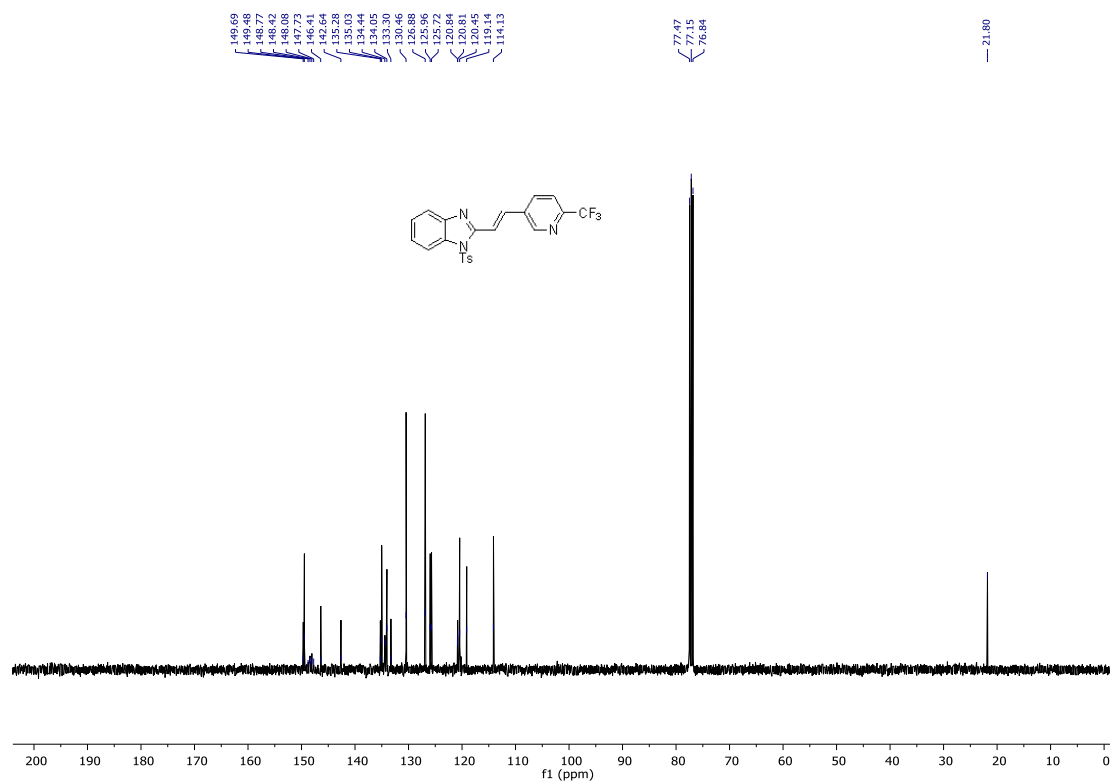



$^{19}\text{F}$  NMR:

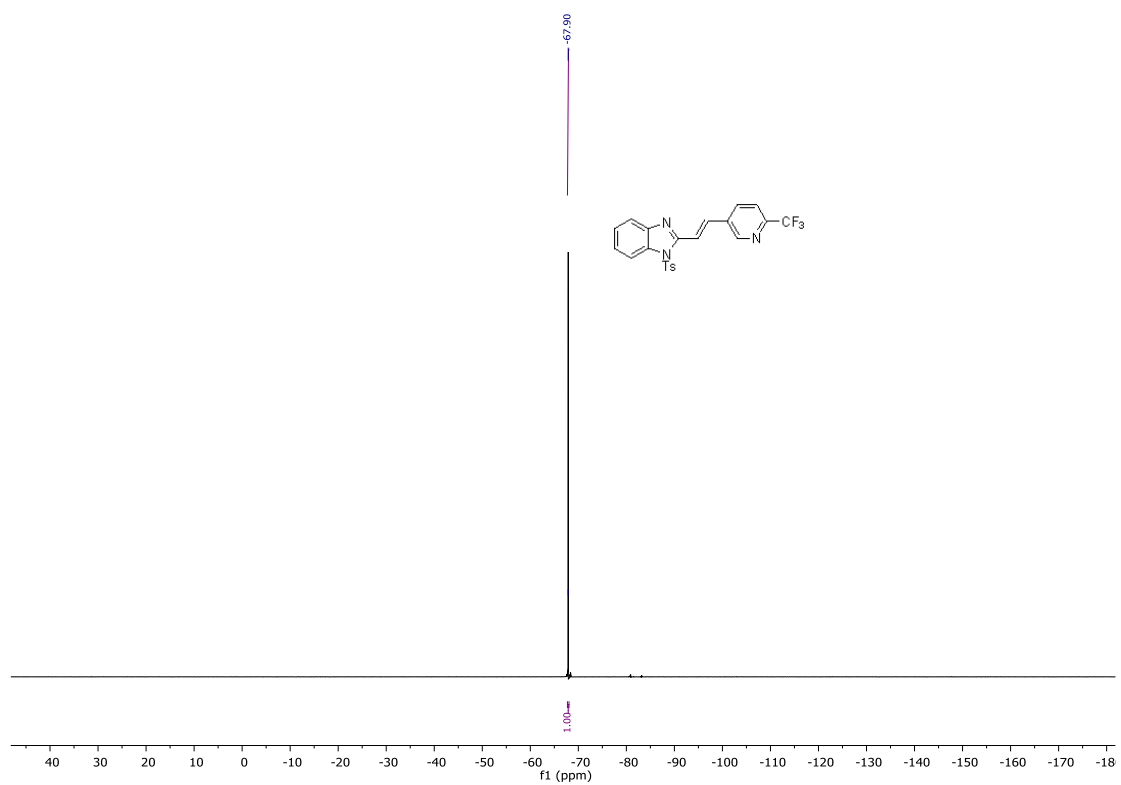

Spectra for 2:

<sup>1</sup>H NMR:

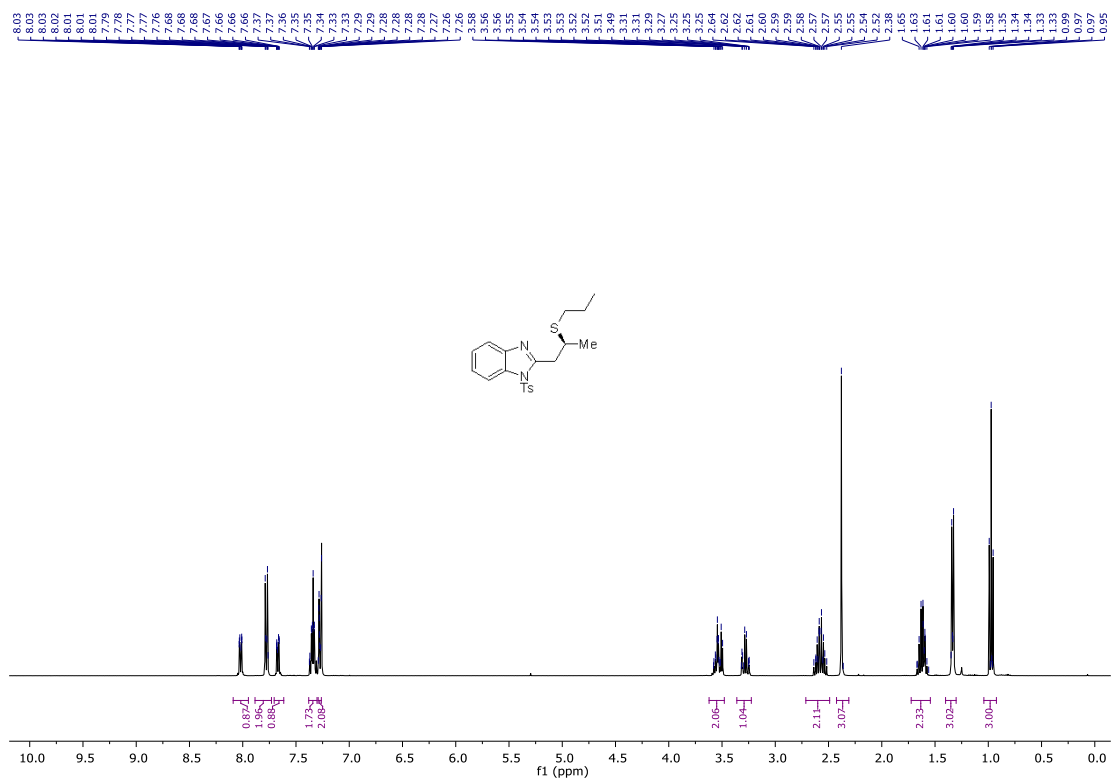

<sup>13</sup>C NMR:

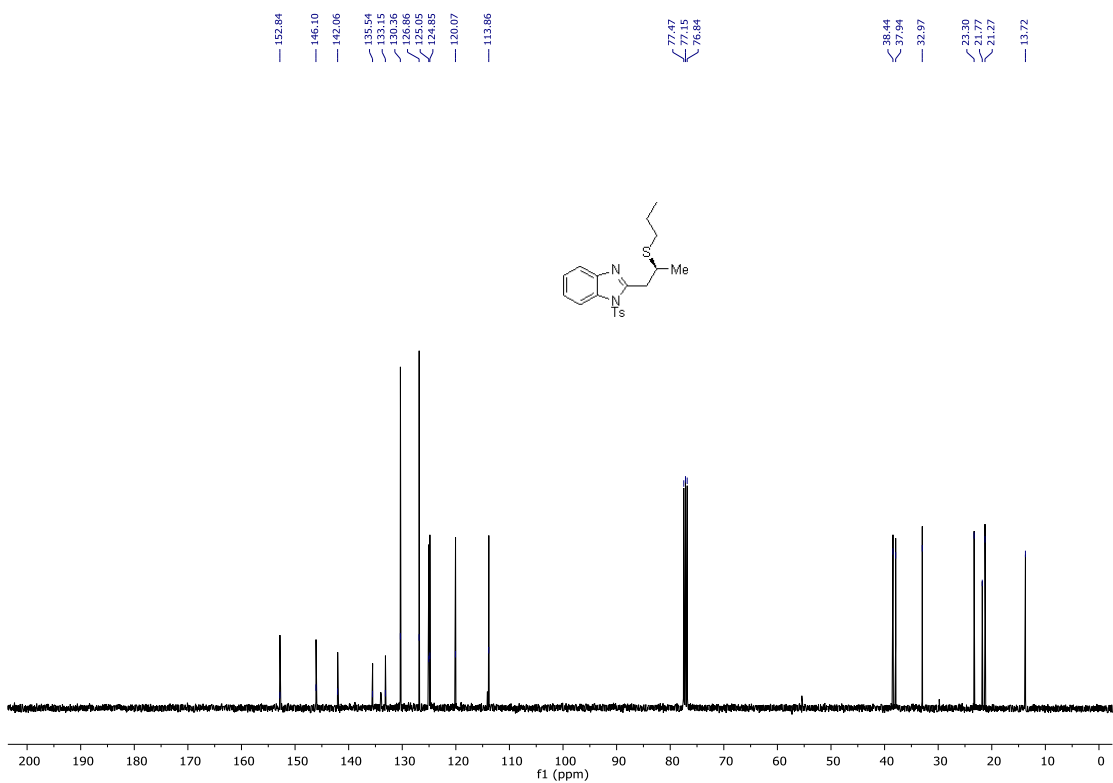

**Spectra for 3:**

**<sup>1</sup>H NMR:**

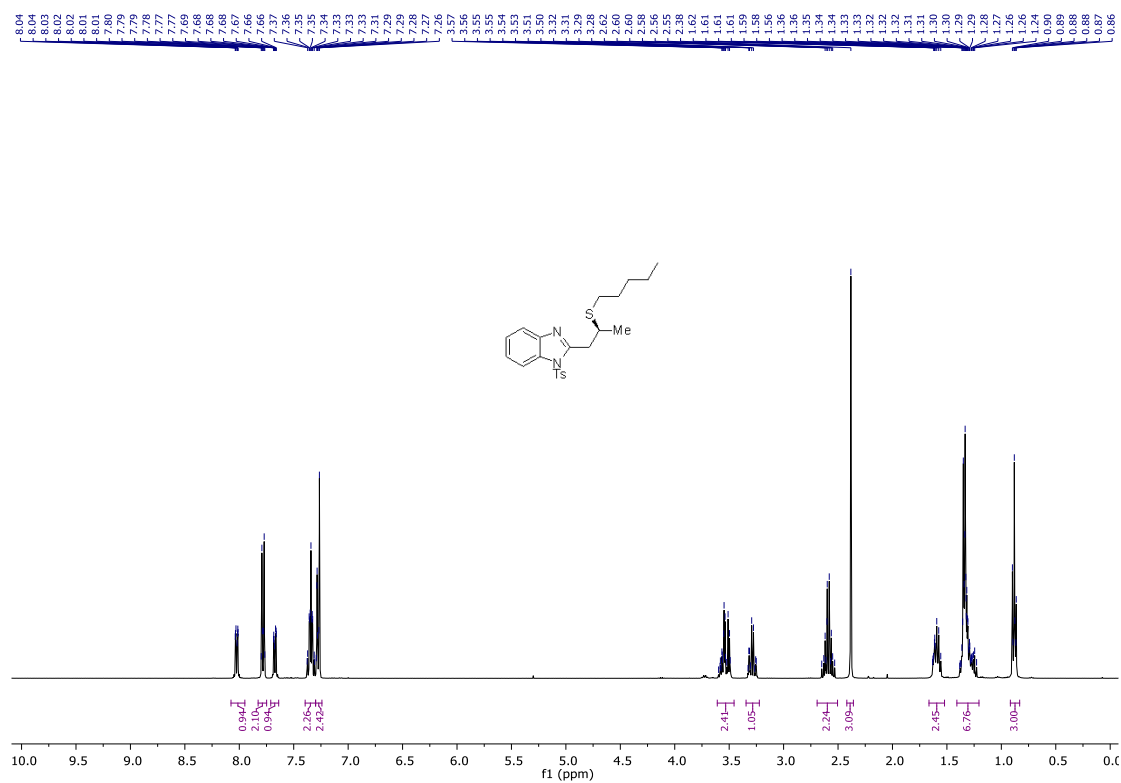

**<sup>13</sup>C NMR:**

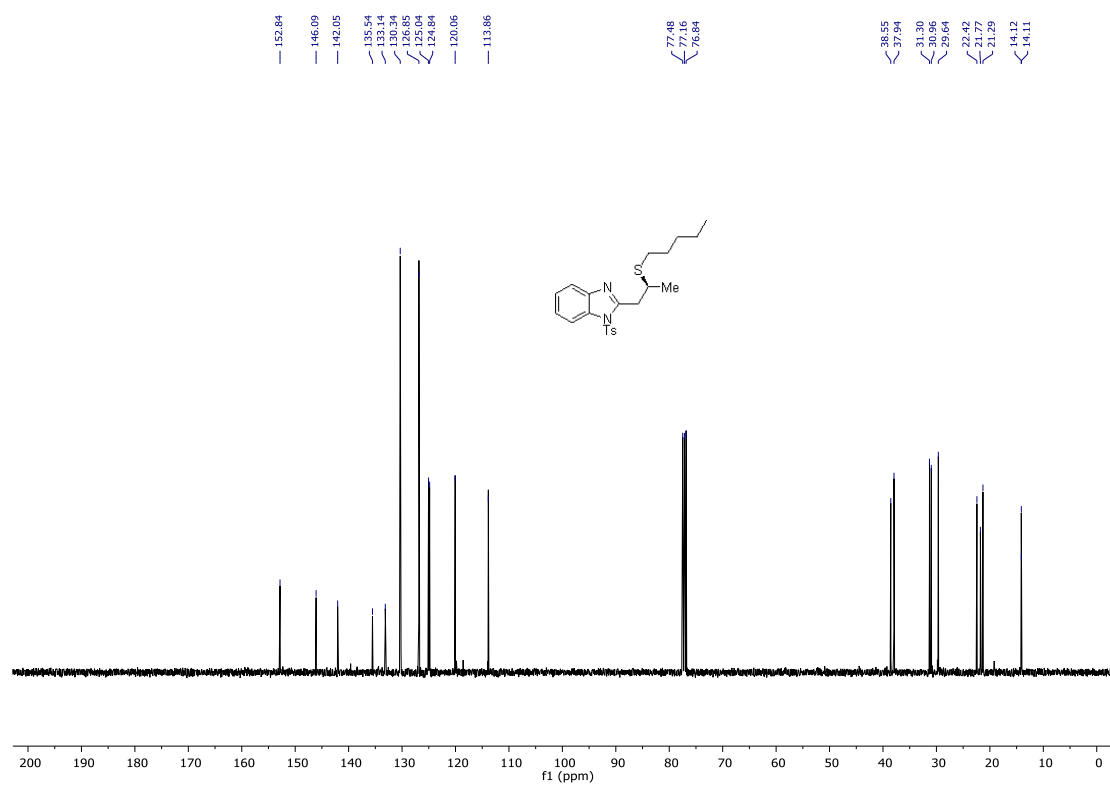

**Spectra for 4:**

**<sup>1</sup>H NMR:**

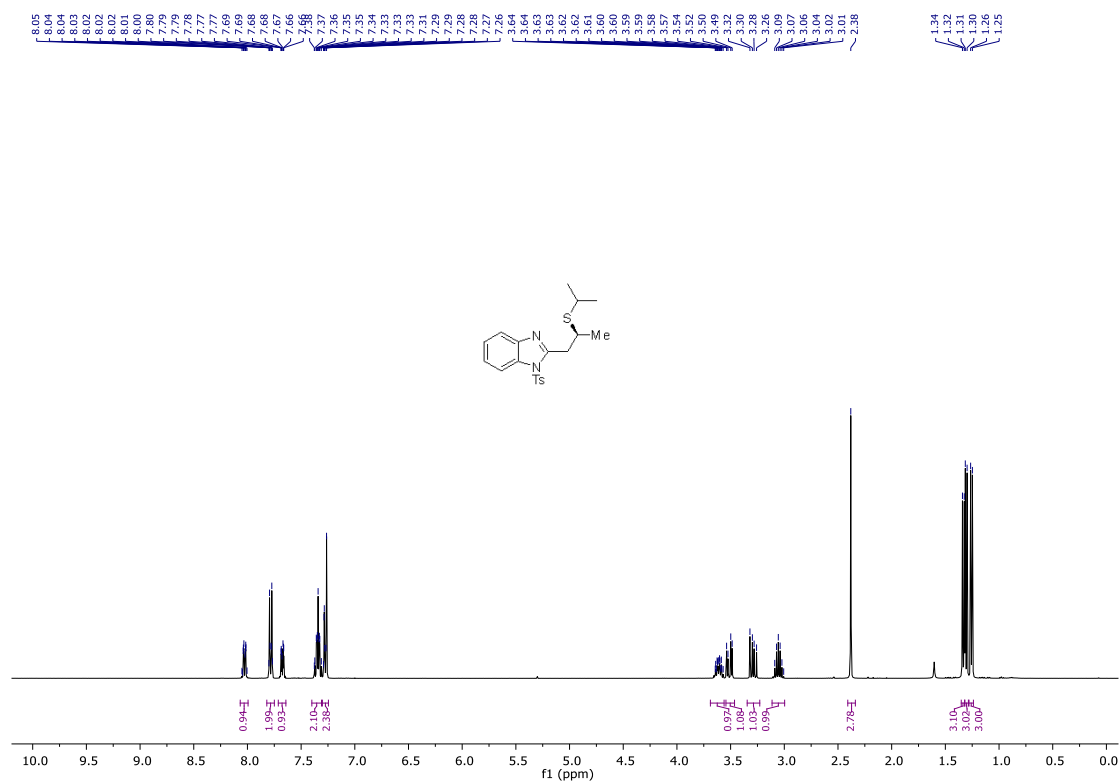

**<sup>13</sup>C NMR:**

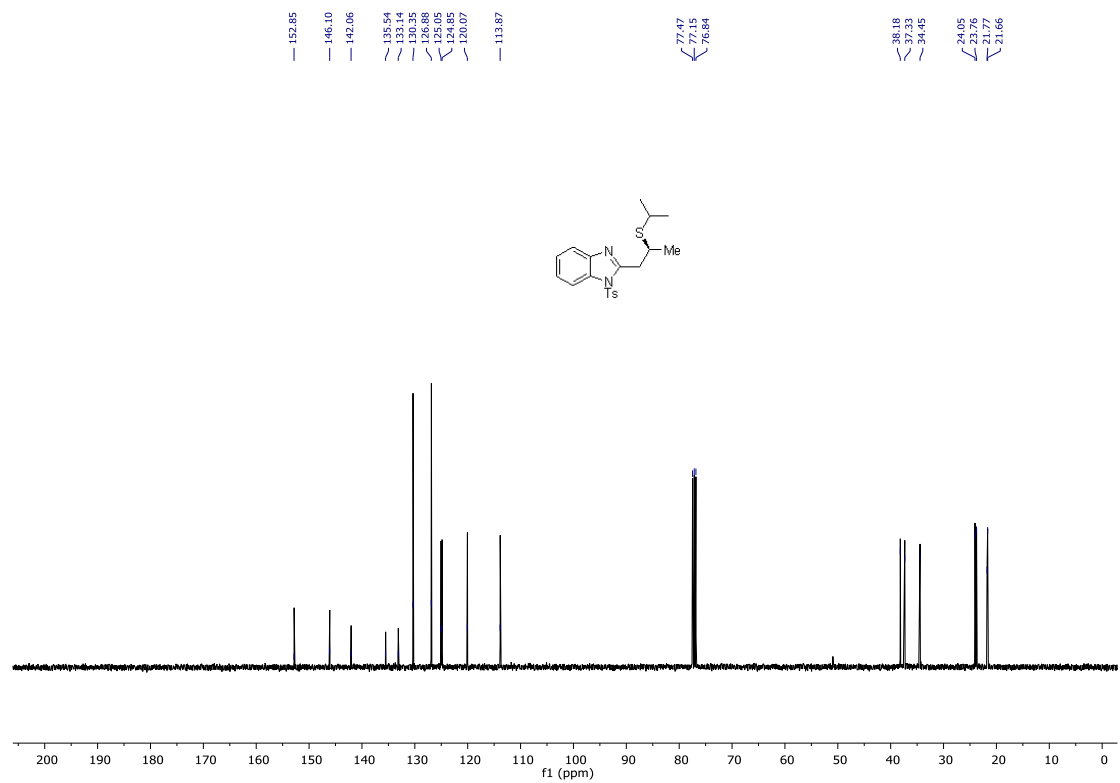

Spectra for **5**:

<sup>1</sup>H NMR:

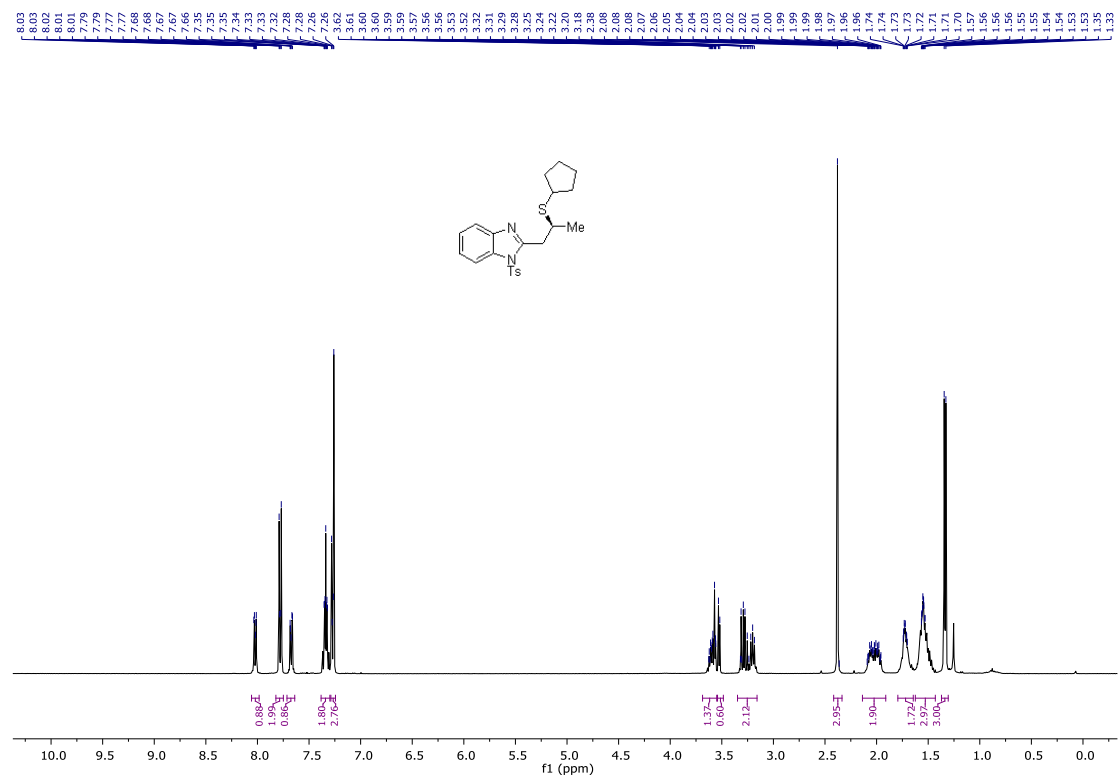

<sup>13</sup>C NMR:

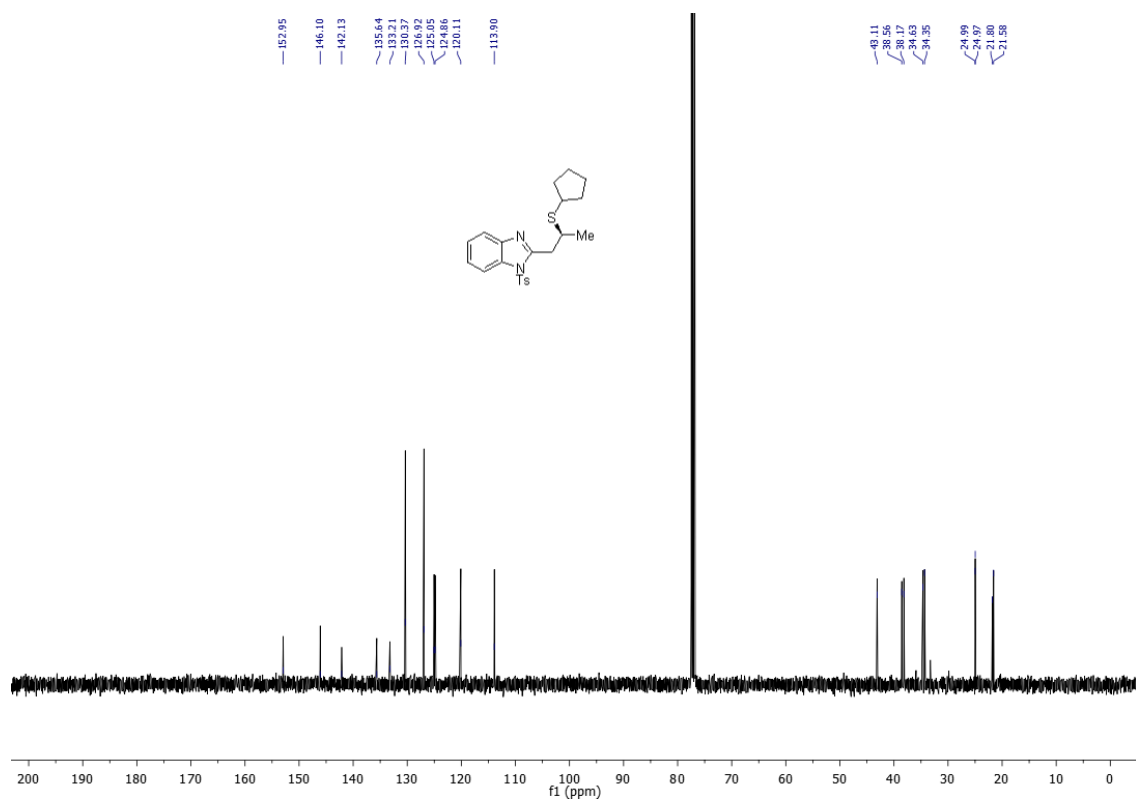

Spectra for **6**:

<sup>1</sup>H NMR:

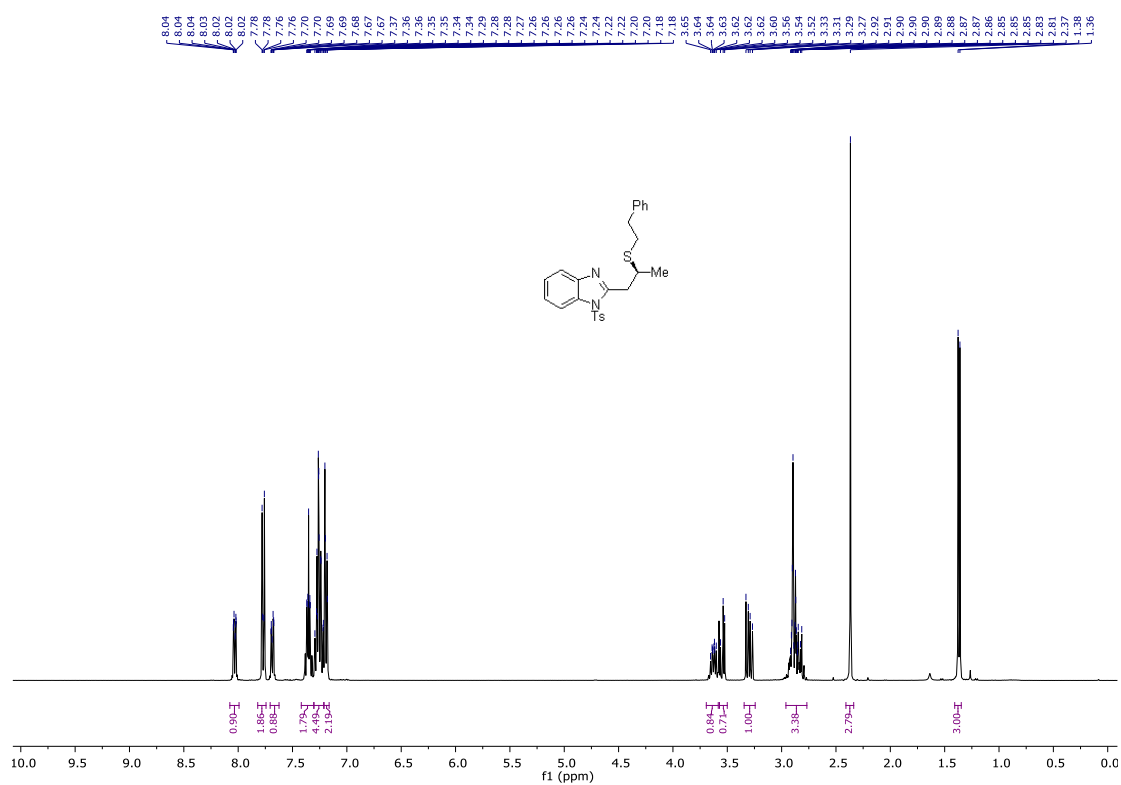

<sup>13</sup>C NMR:

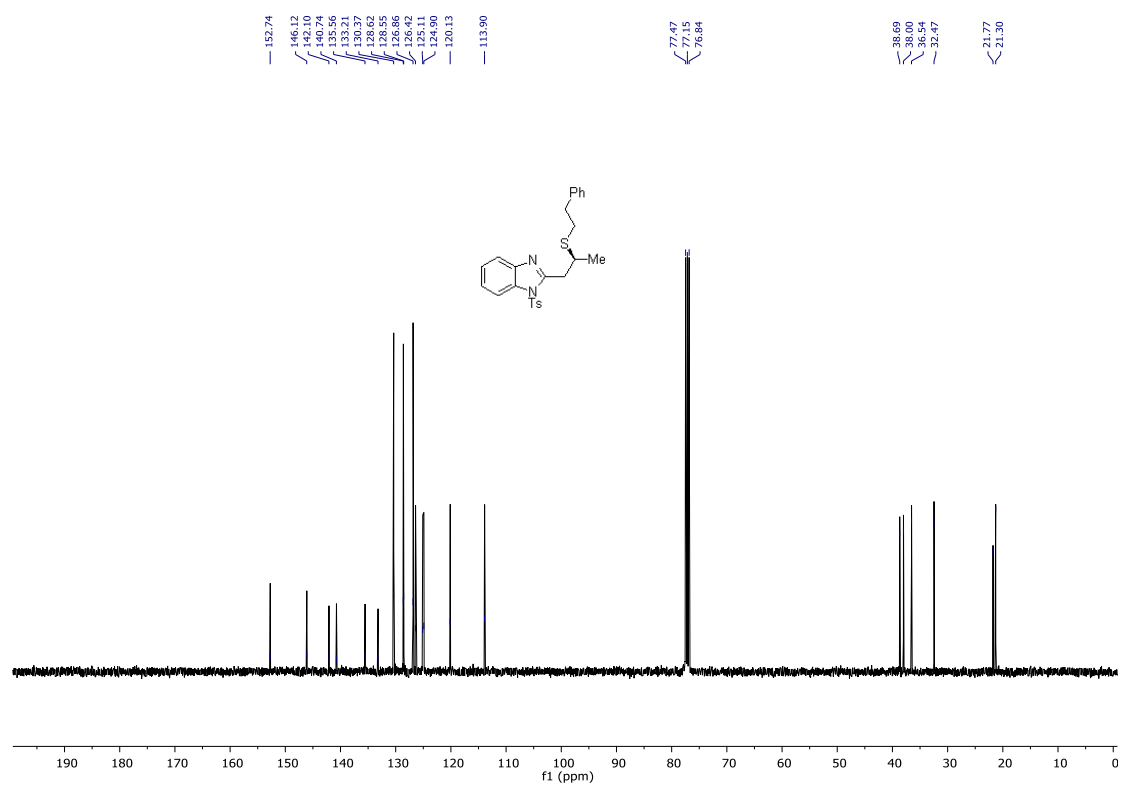

# Spectra for 7:

<sup>1</sup>H NMR:

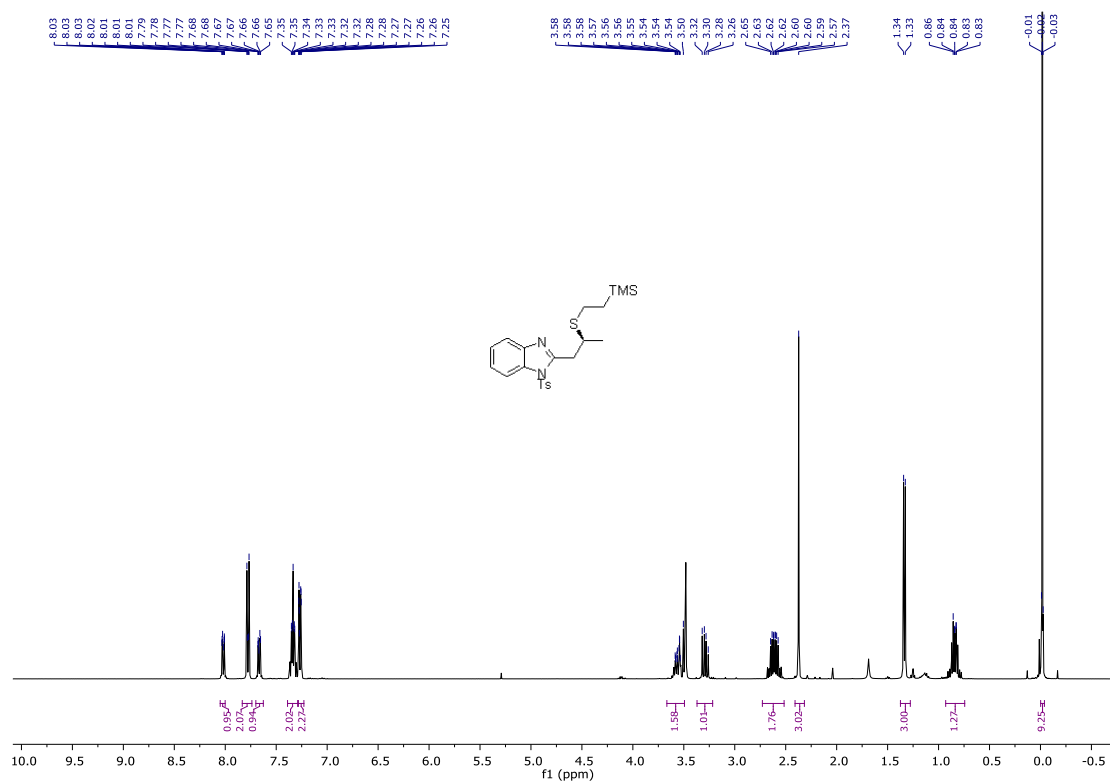

<sup>13</sup>C NMR:

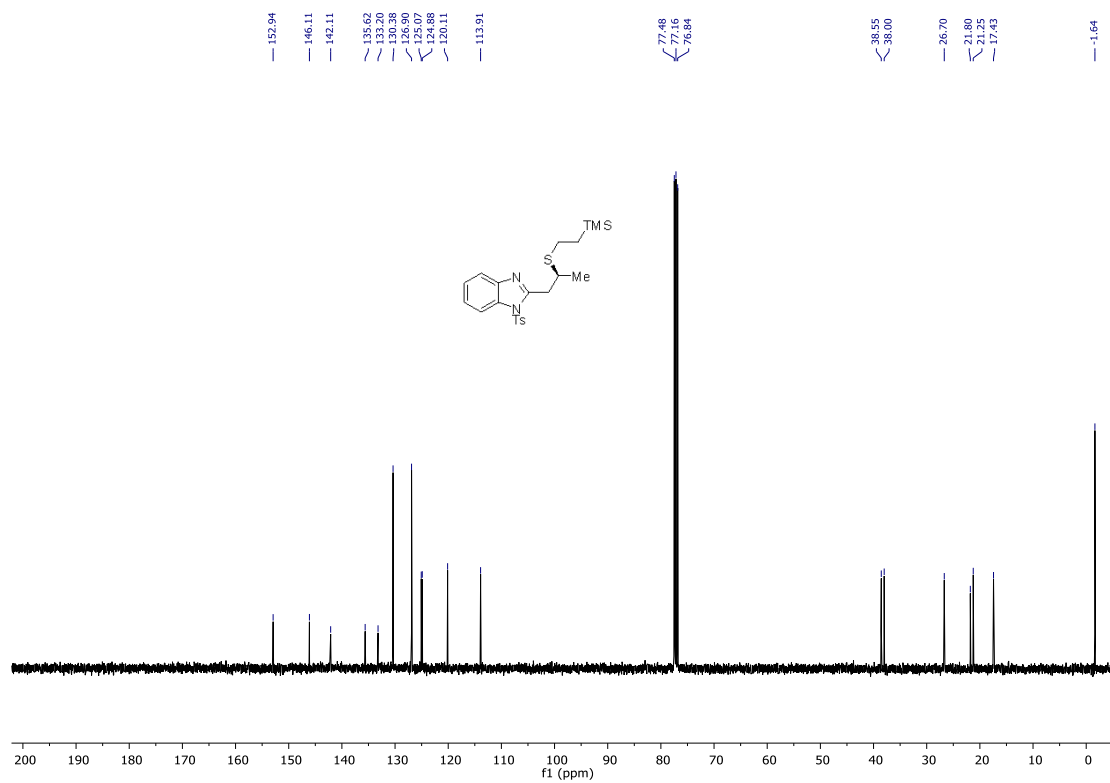

**Spectra for 8:**

<sup>1</sup>H NMR:

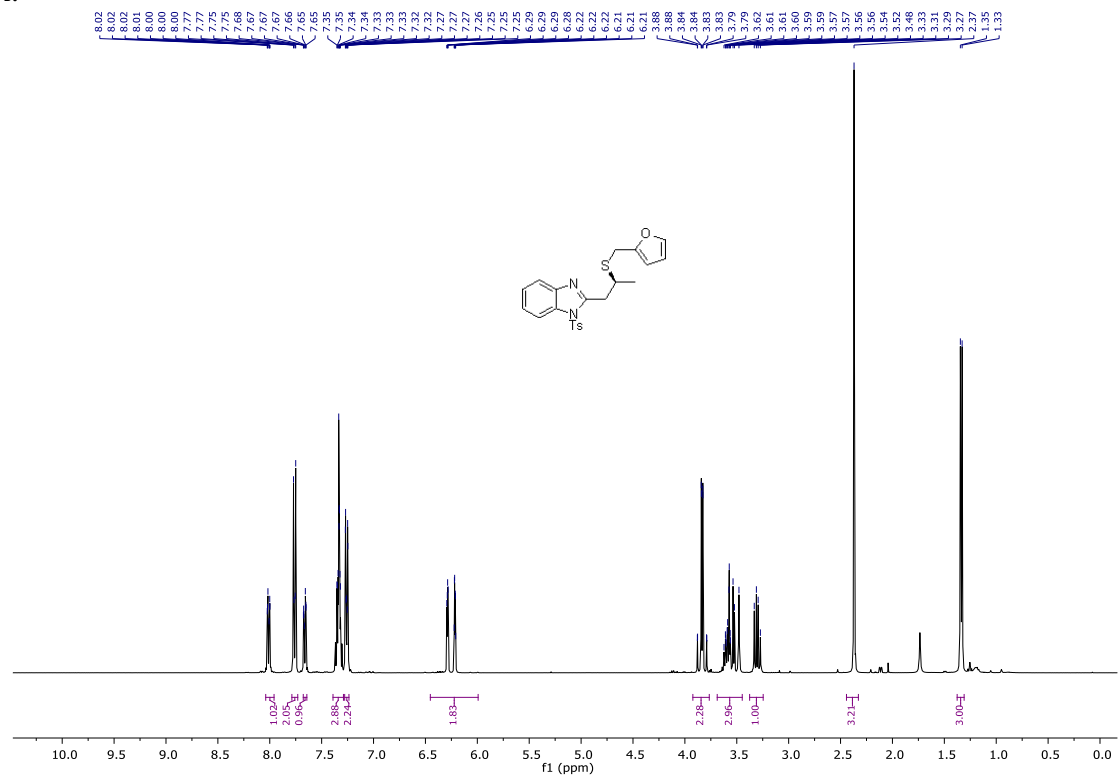

<sup>13</sup>C NMR:

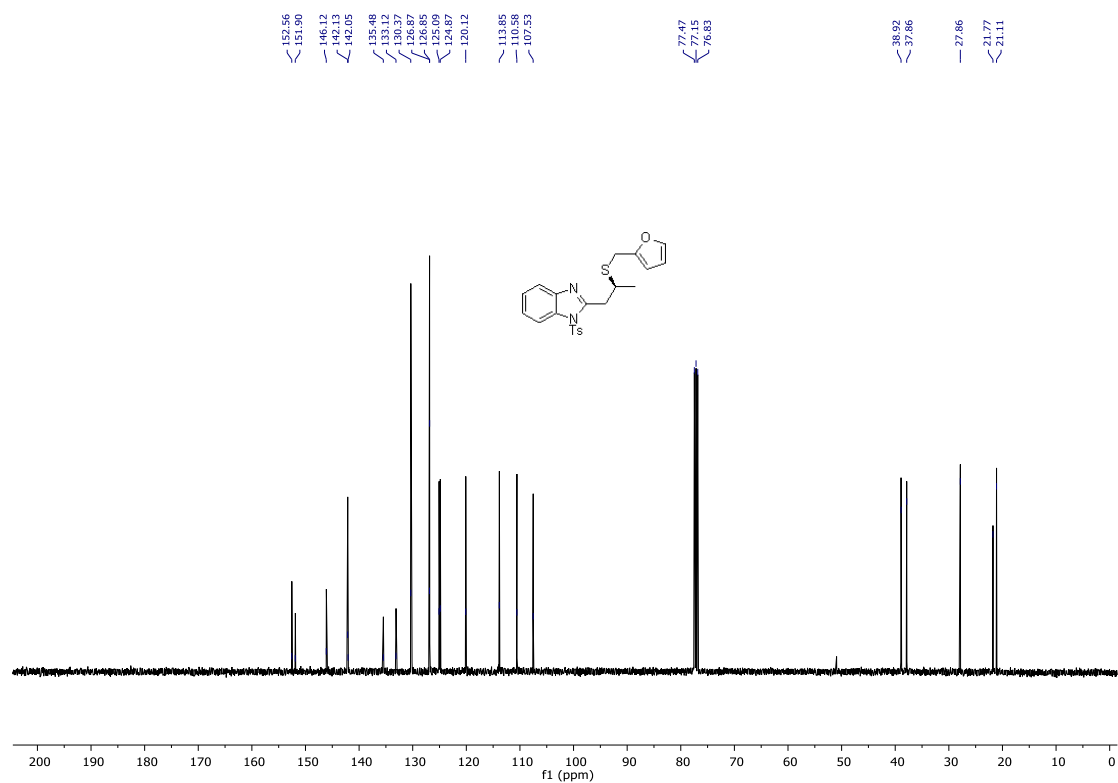



**Spectra for 9:**

<sup>1</sup>H NMR:

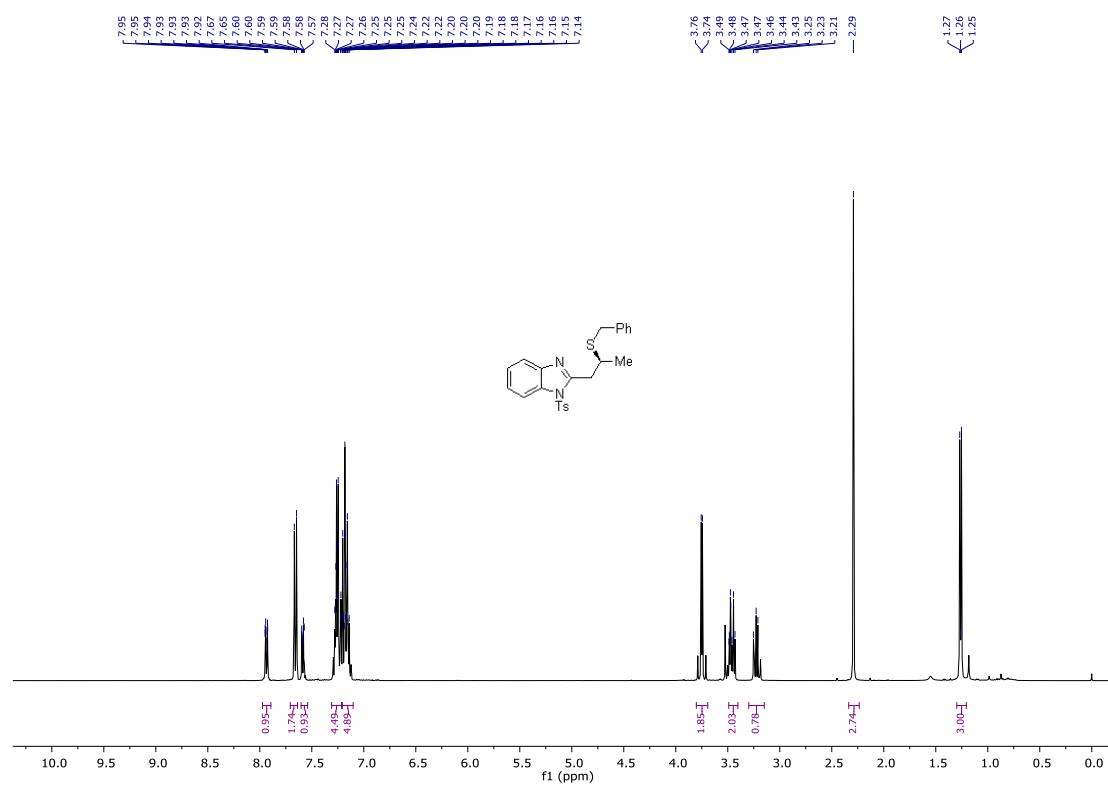

<sup>13</sup>C NMR:

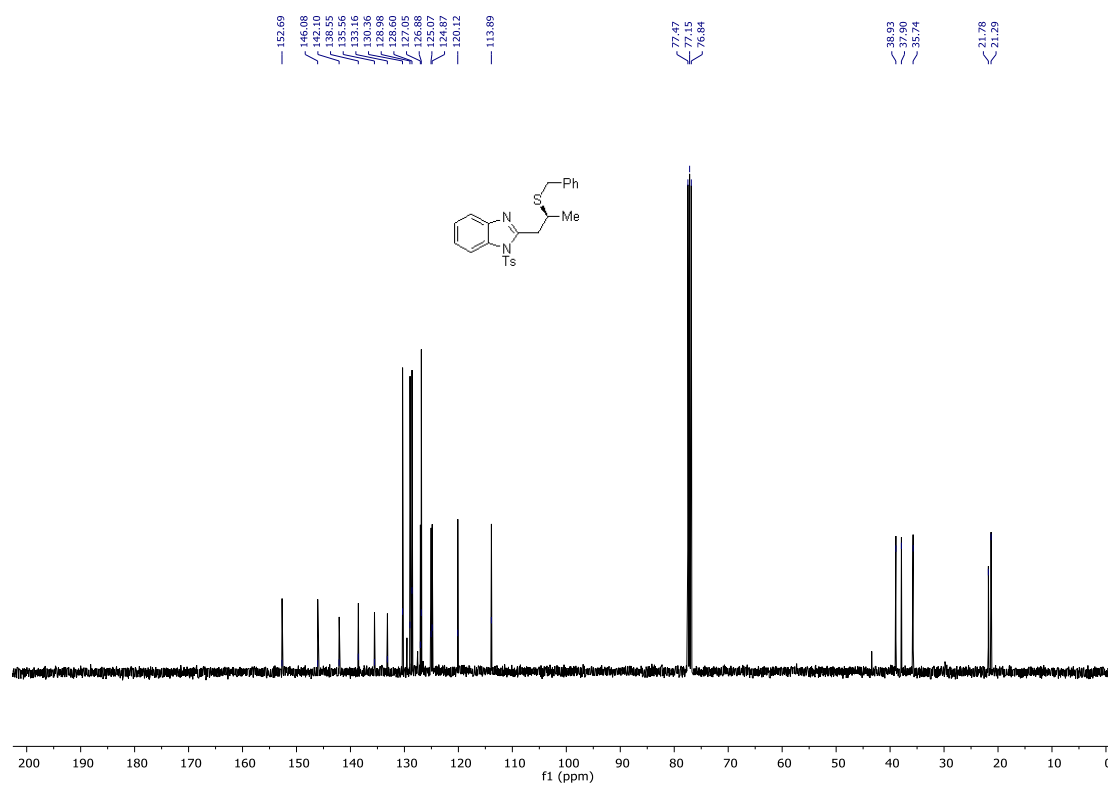

**Spectra for 10:**

<sup>1</sup>H NMR:

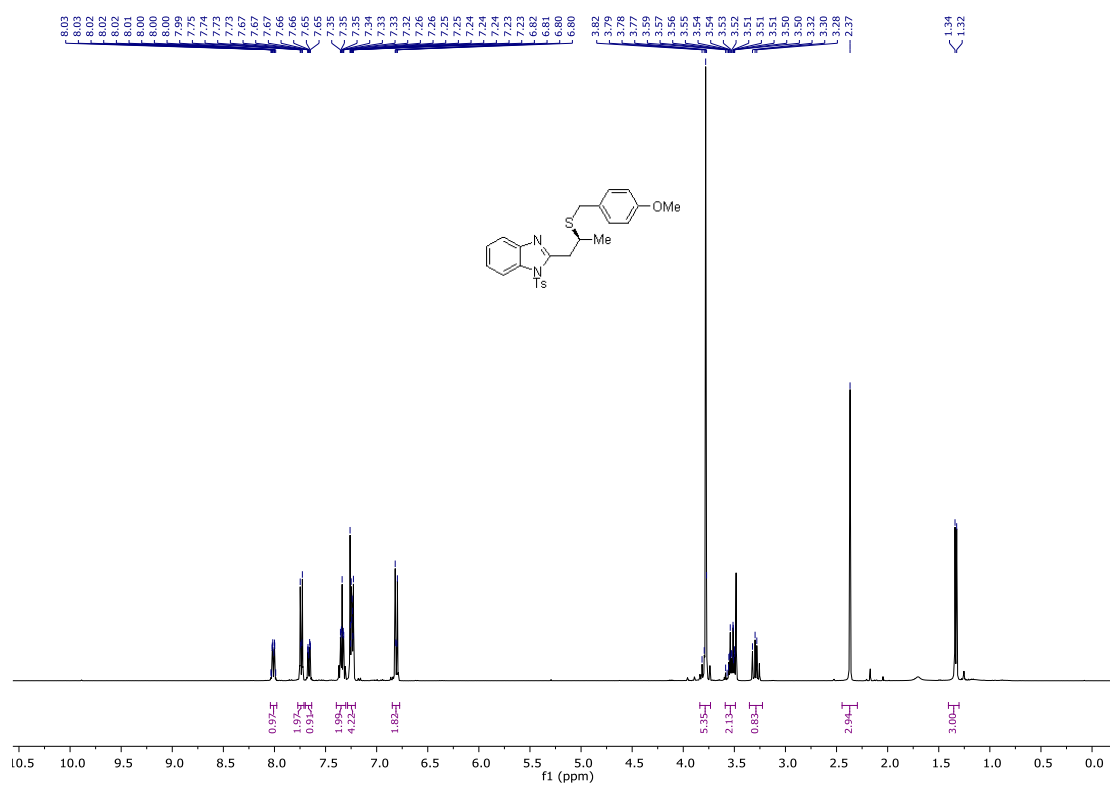

<sup>13</sup>C NMR:

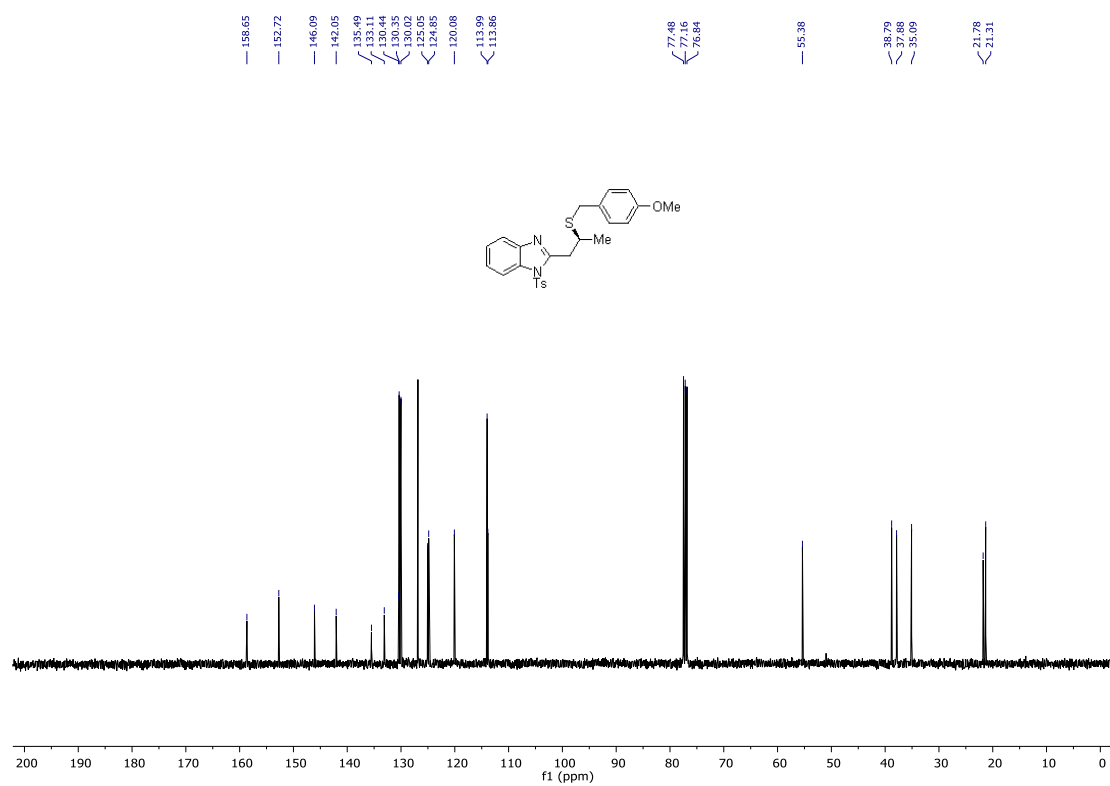

### Spectra for **11**:

<sup>1</sup>H NMR:

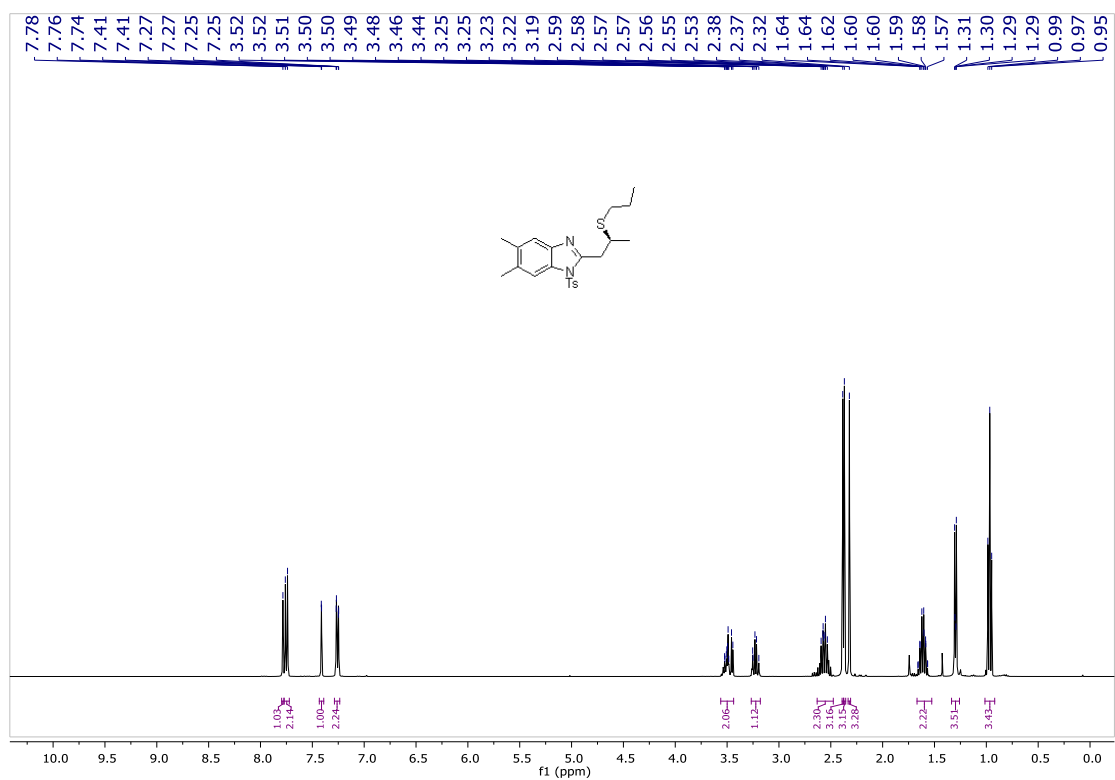

<sup>13</sup>C NMR:

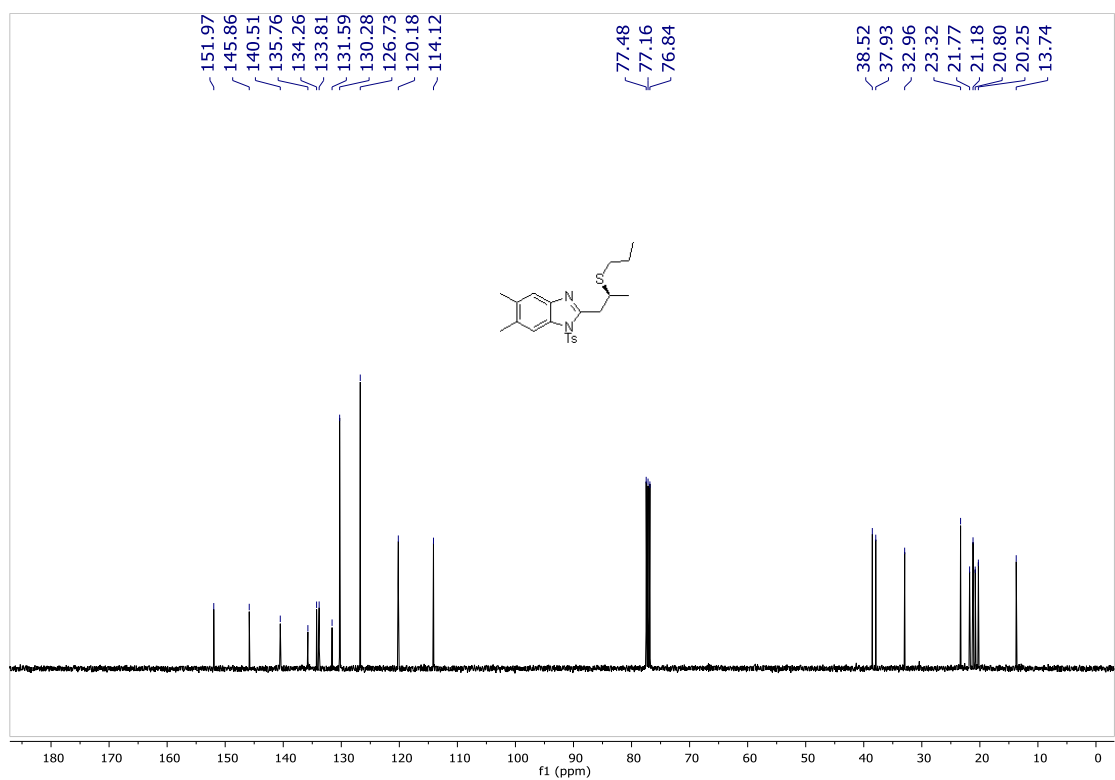

**Spectra for 12:**  
<sup>1</sup>H NMR:

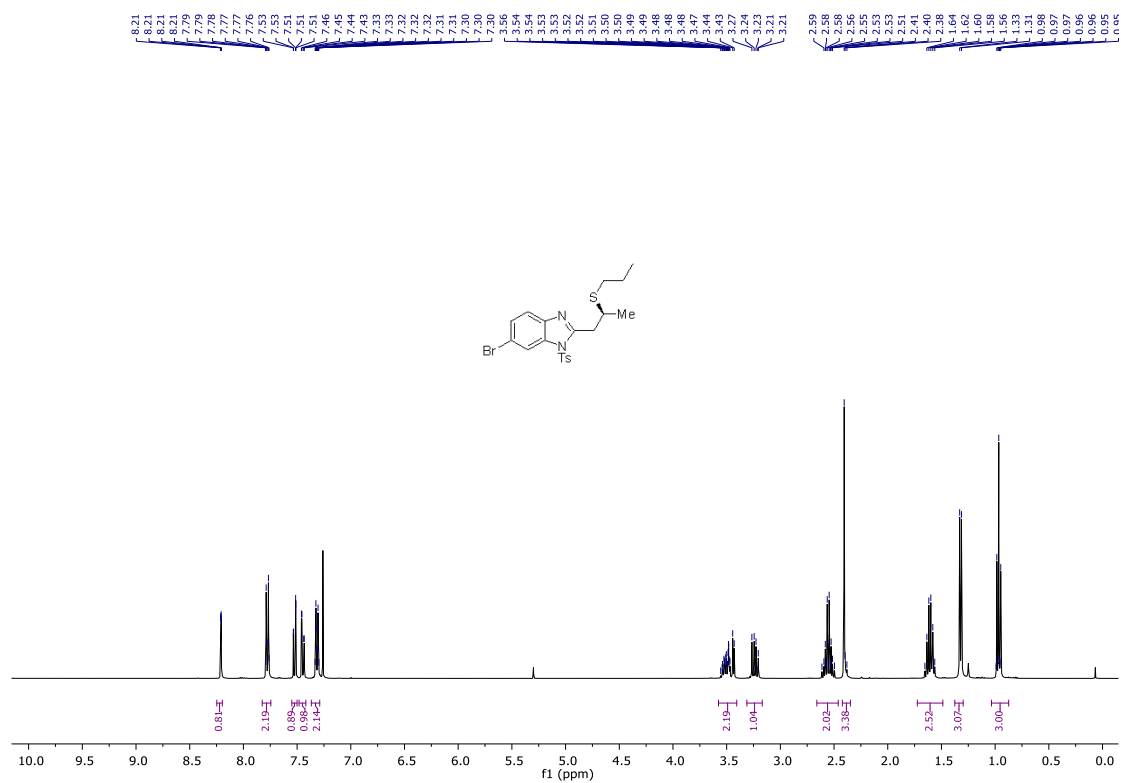

<sup>13</sup>C NMR:

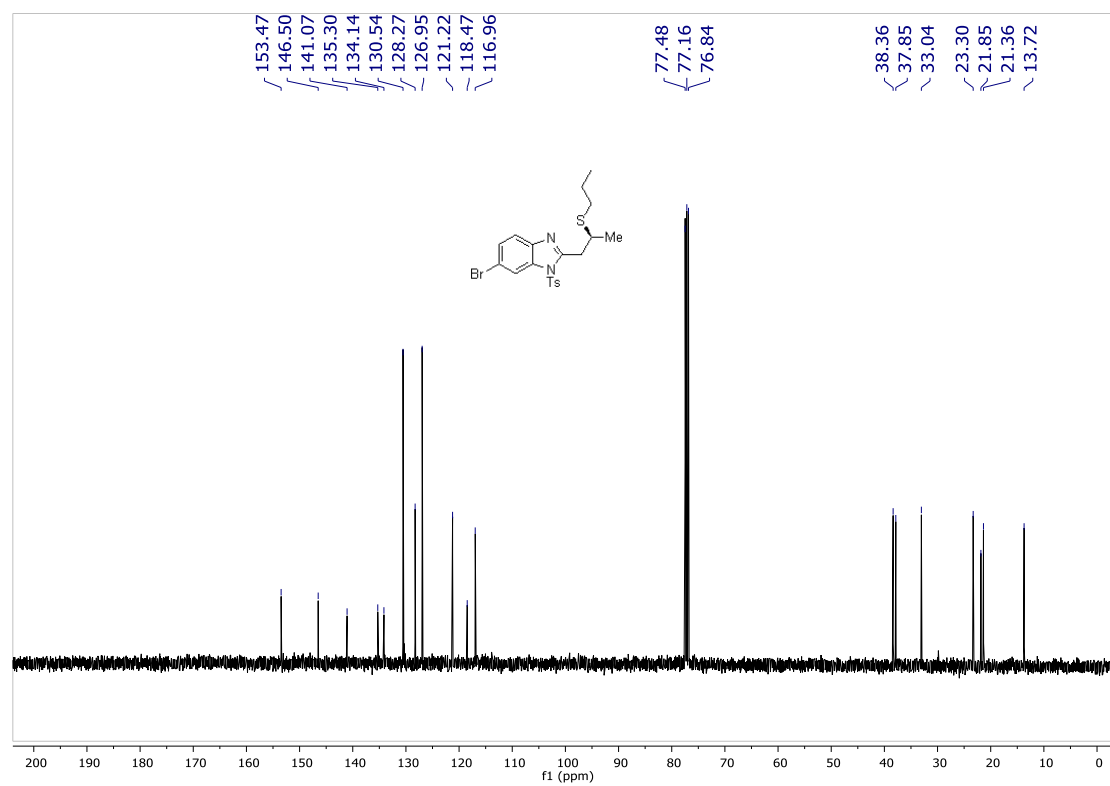

**Spectra for 13:**

**<sup>1</sup>H NMR:**

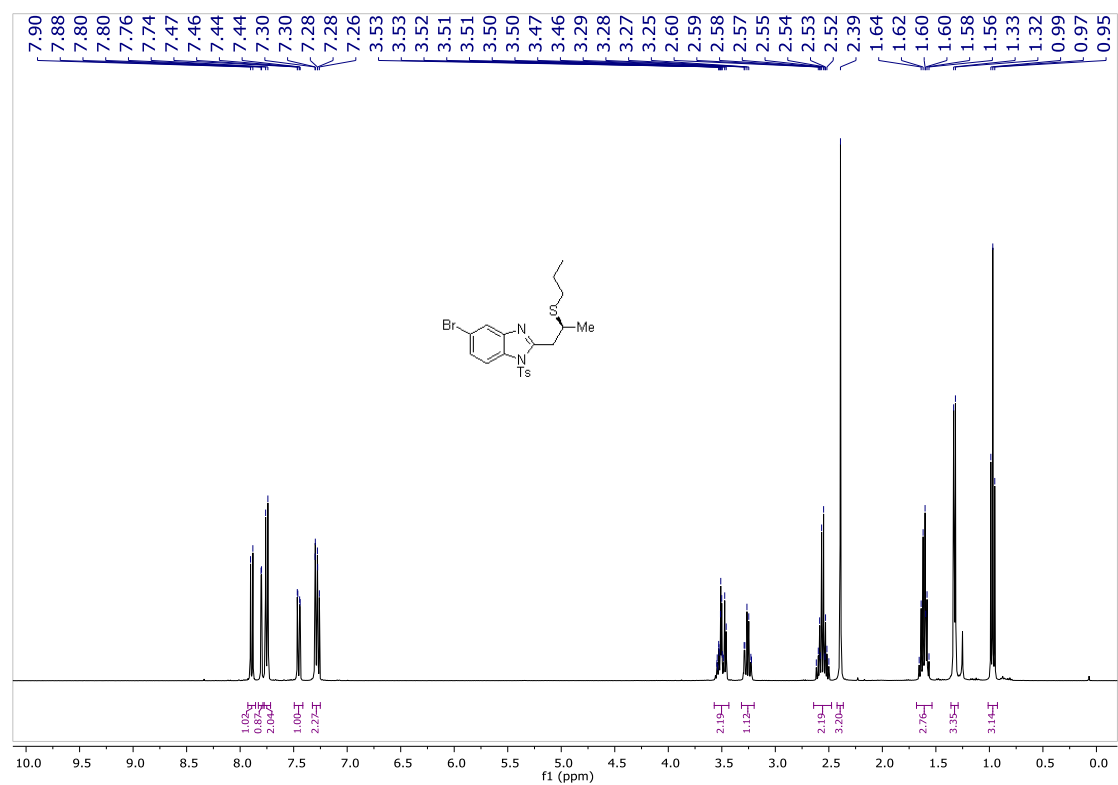

**<sup>13</sup>C NMR:**

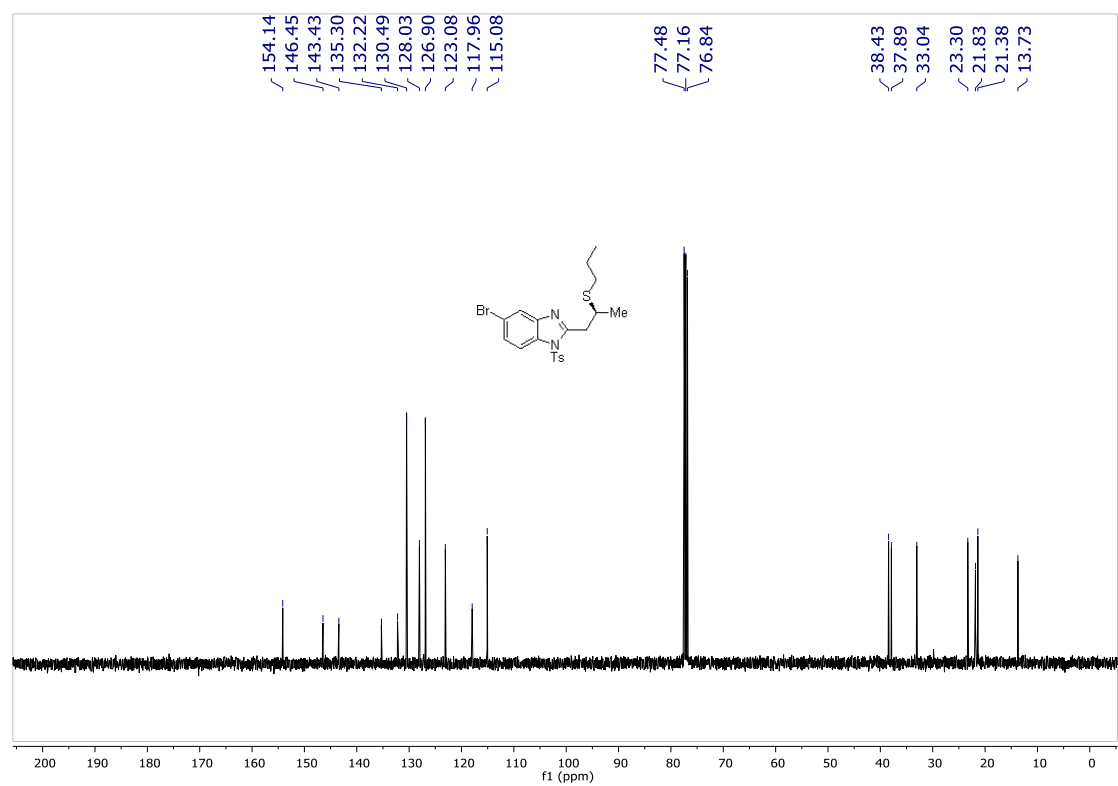



Spectra for **15**:

$^1\text{H}$  NMR:

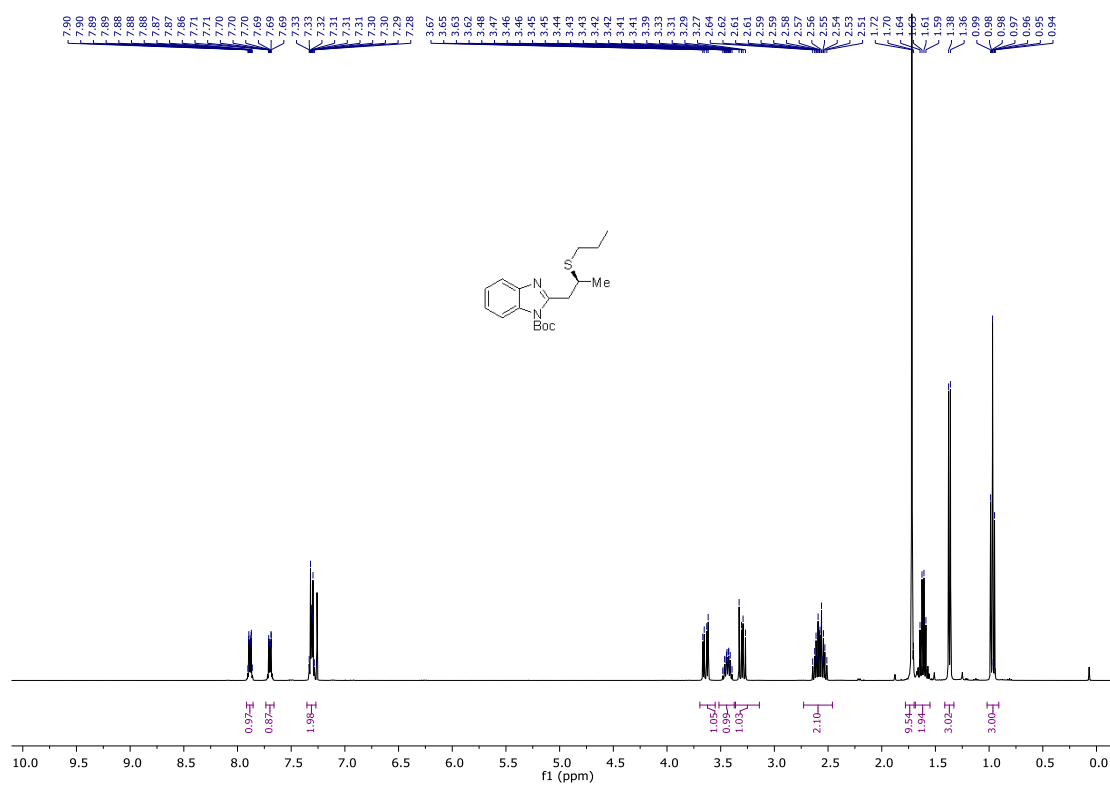

$^{13}\text{C}$  NMR:

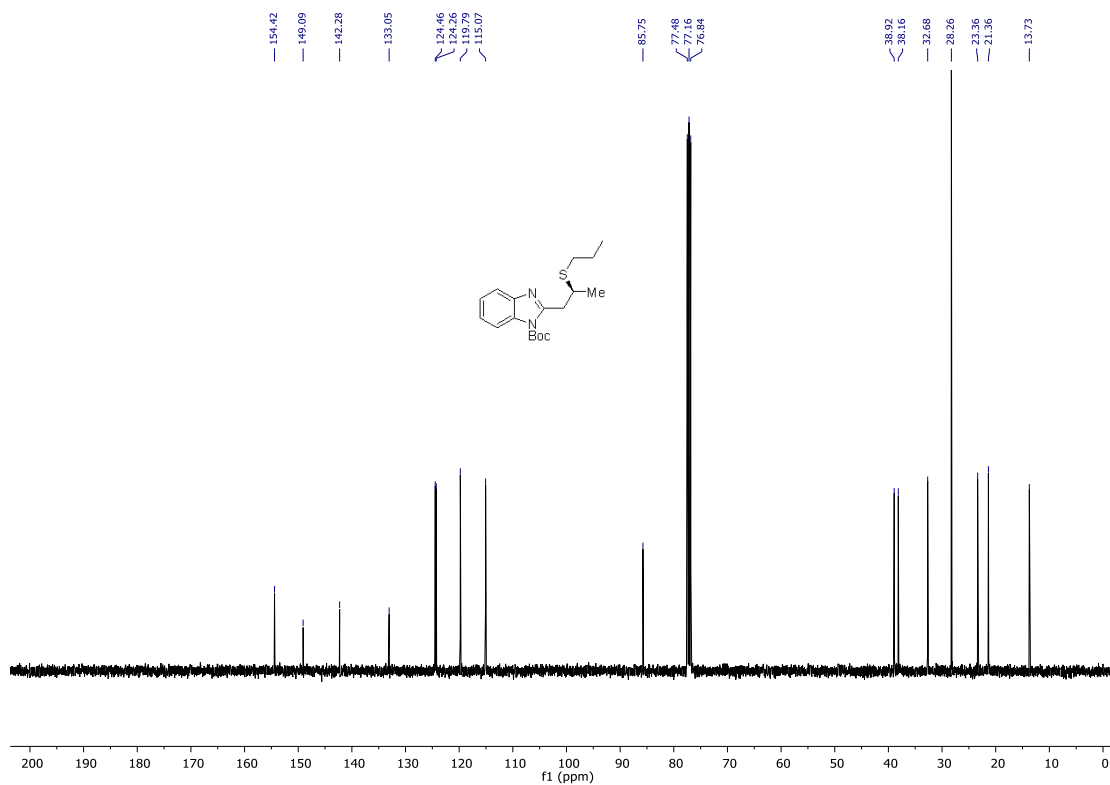

Spectra for **16**:

$^1\text{H}$  NMR:

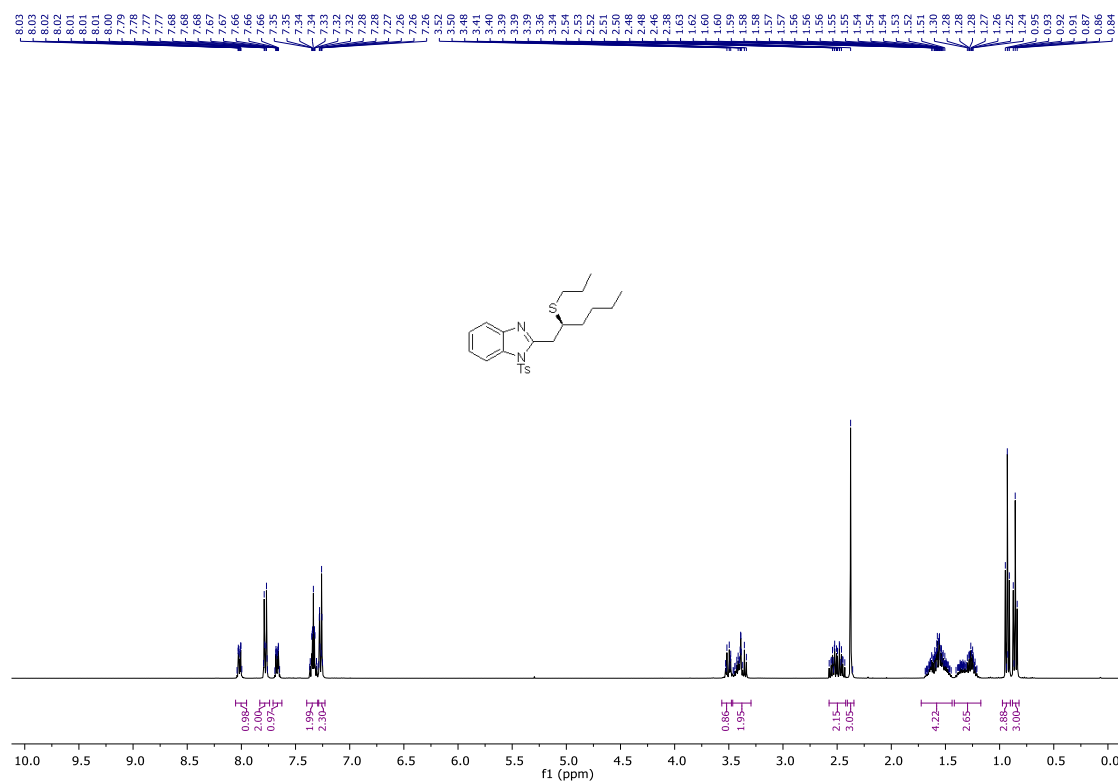

$^{13}\text{C}$  NMR:

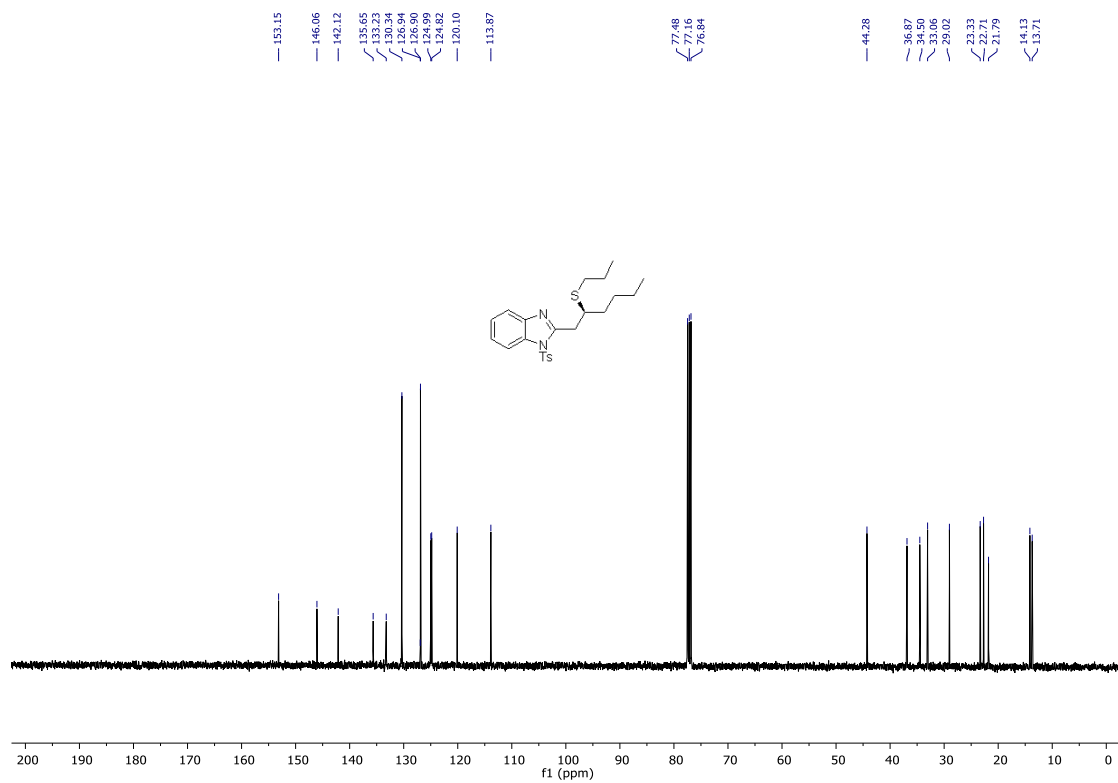



Spectra for 17:

<sup>1</sup>H NMR:

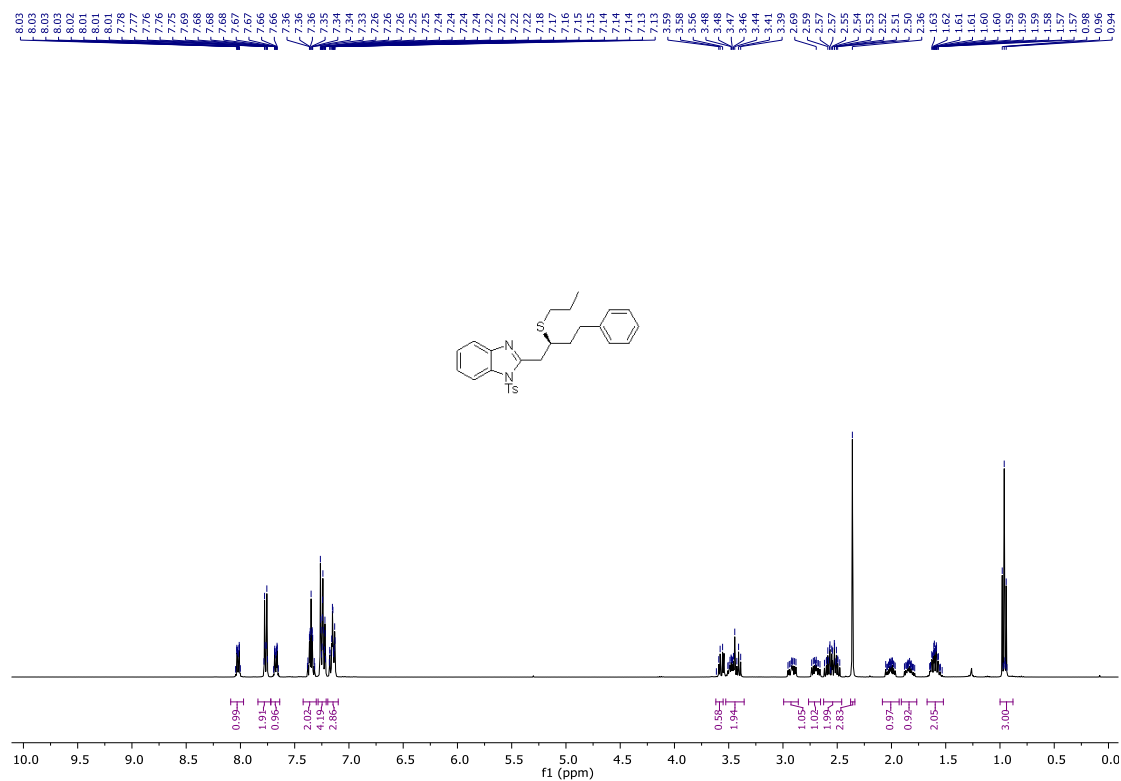

<sup>13</sup>C NMR:

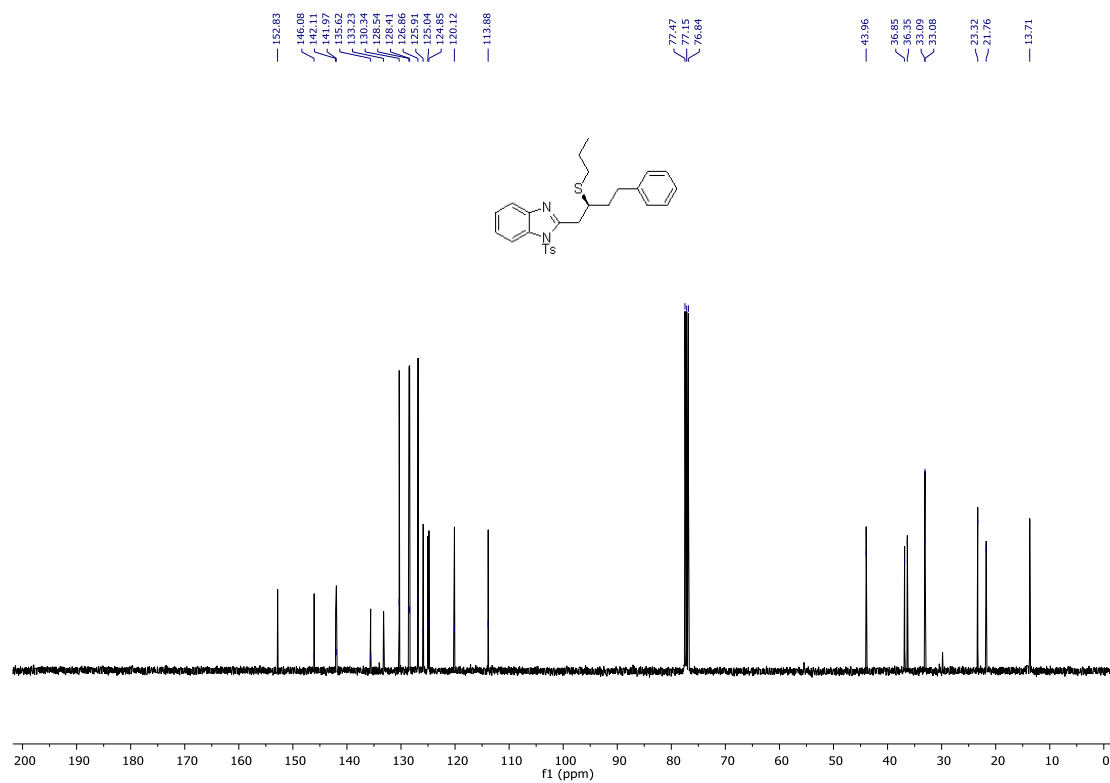

**Spectra for 18:**

**<sup>1</sup>H NMR:**

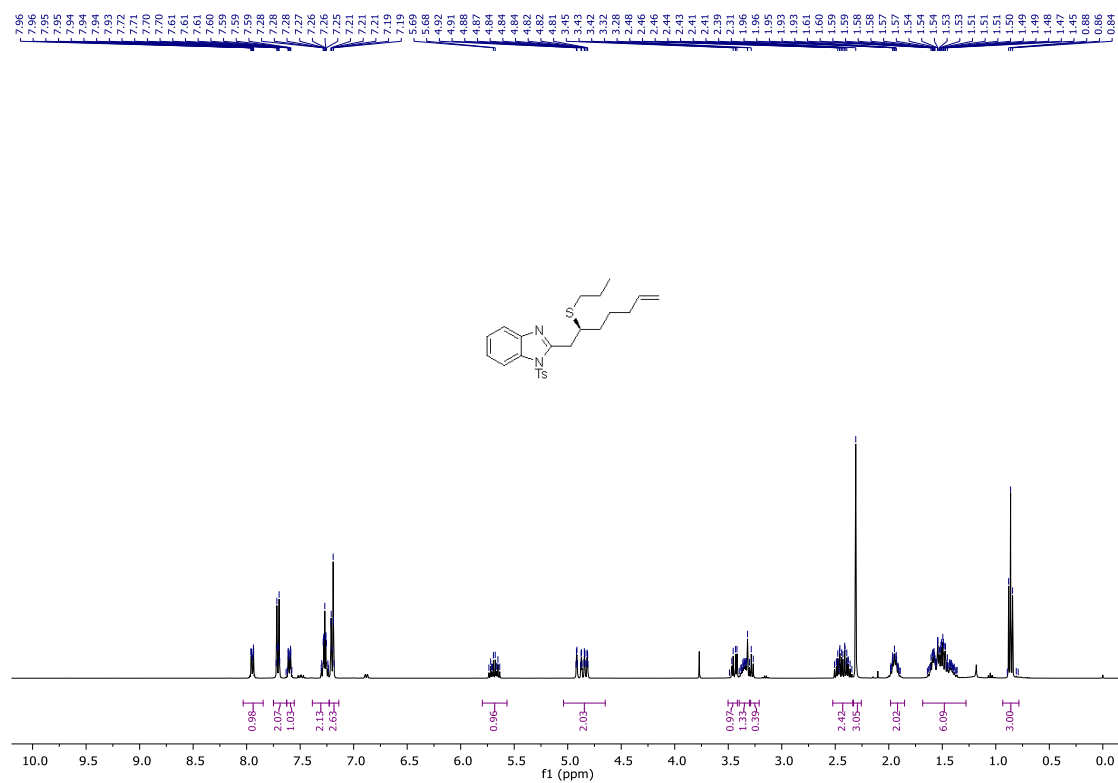

**<sup>13</sup>C NMR:**

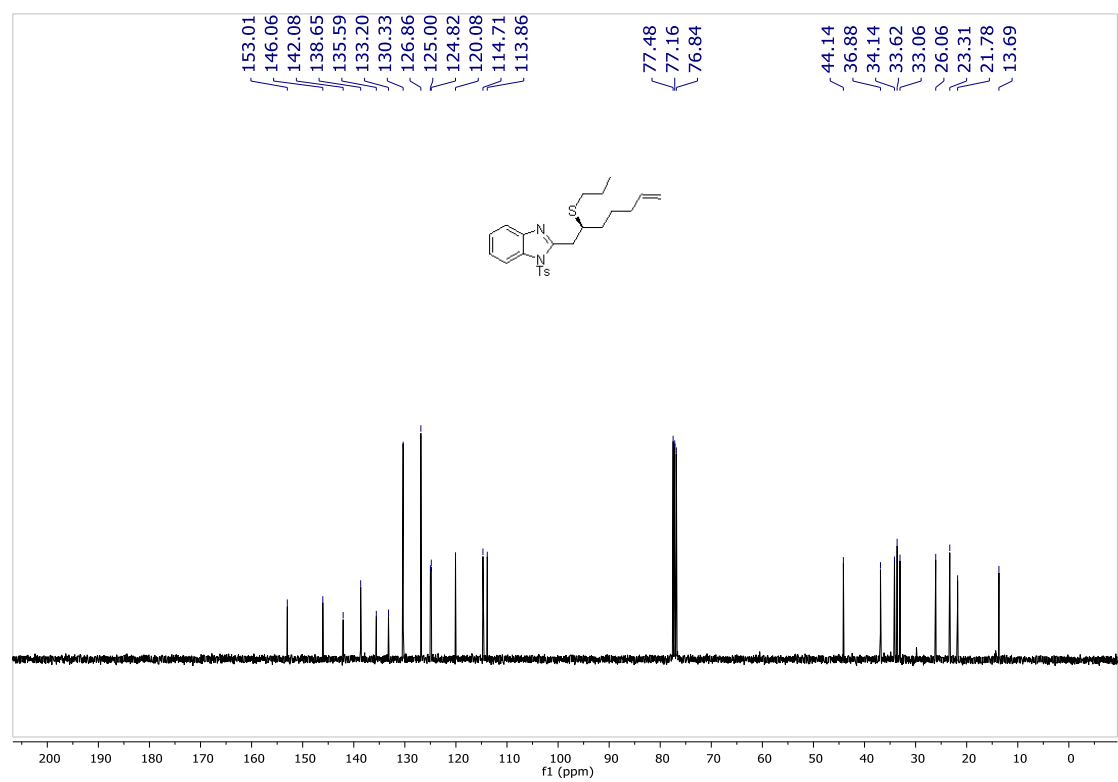

**Spectra for 19:**

**<sup>1</sup>H NMR:**

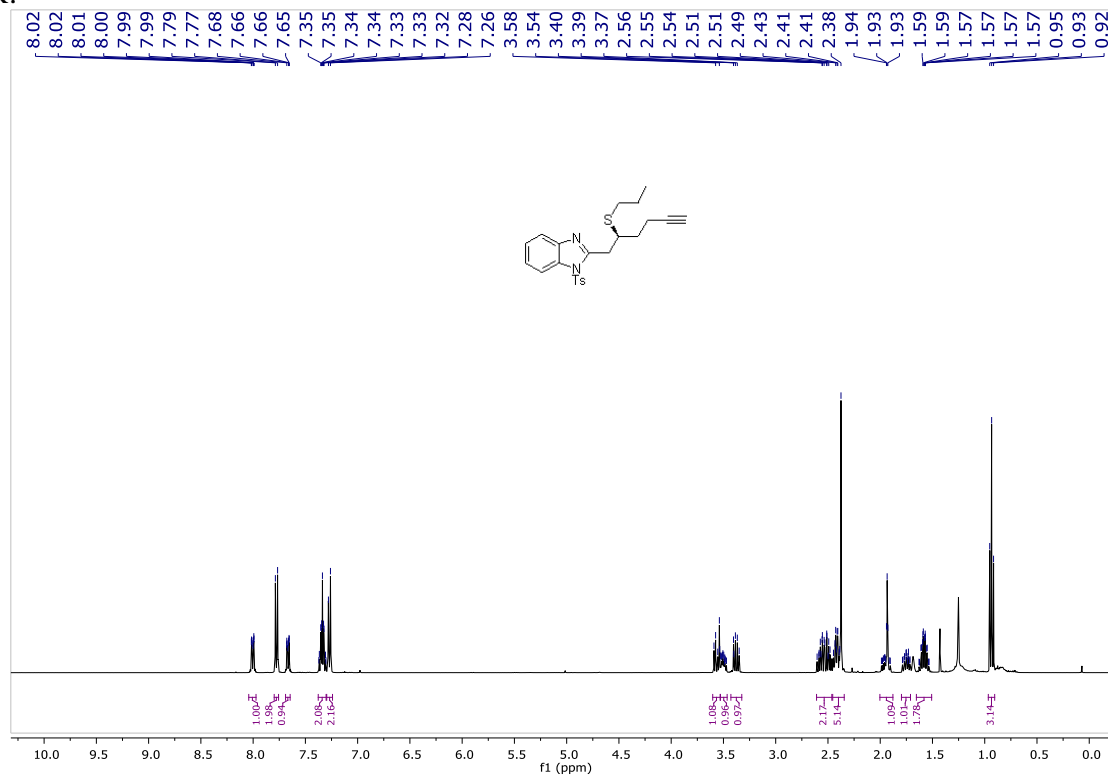

**<sup>13</sup>C NMR:**

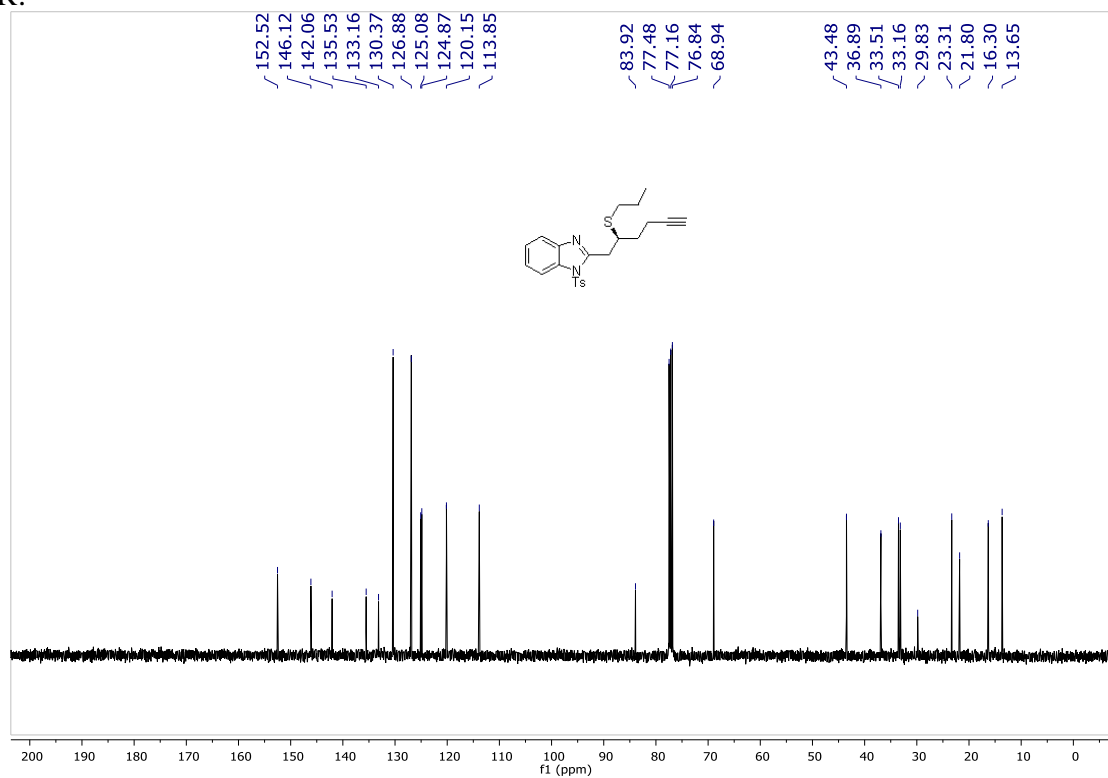

Spectra for **20**:

<sup>1</sup>H NMR:

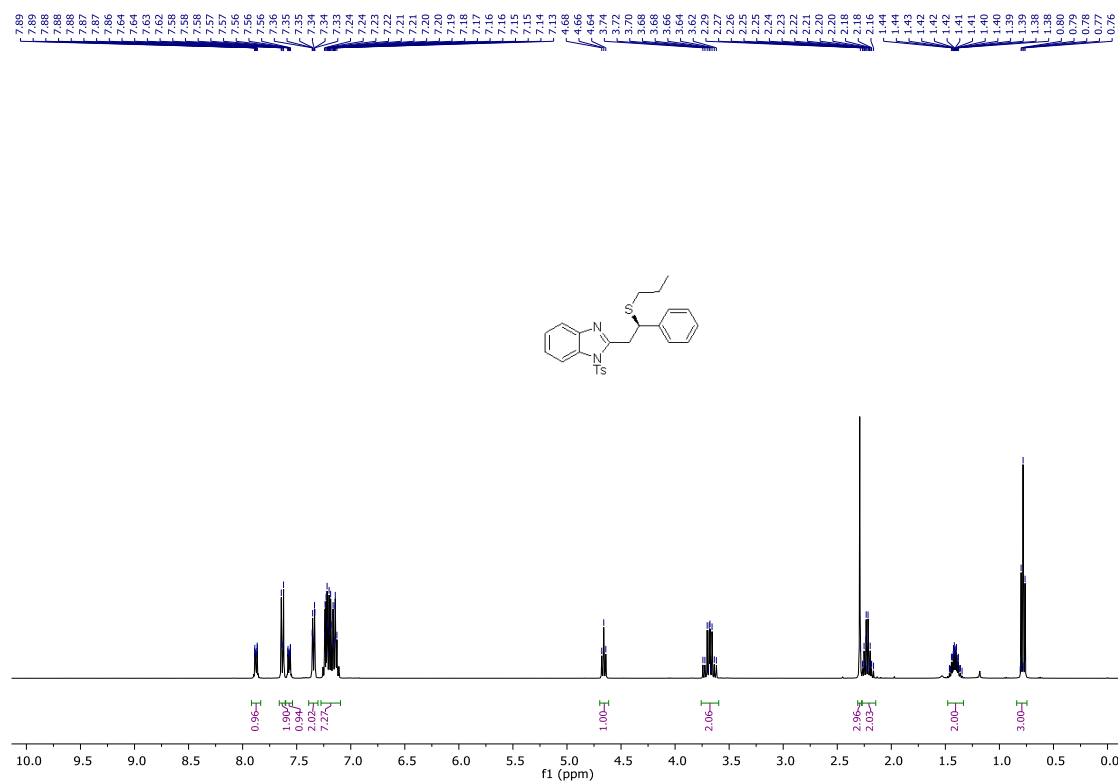

<sup>13</sup>C NMR:

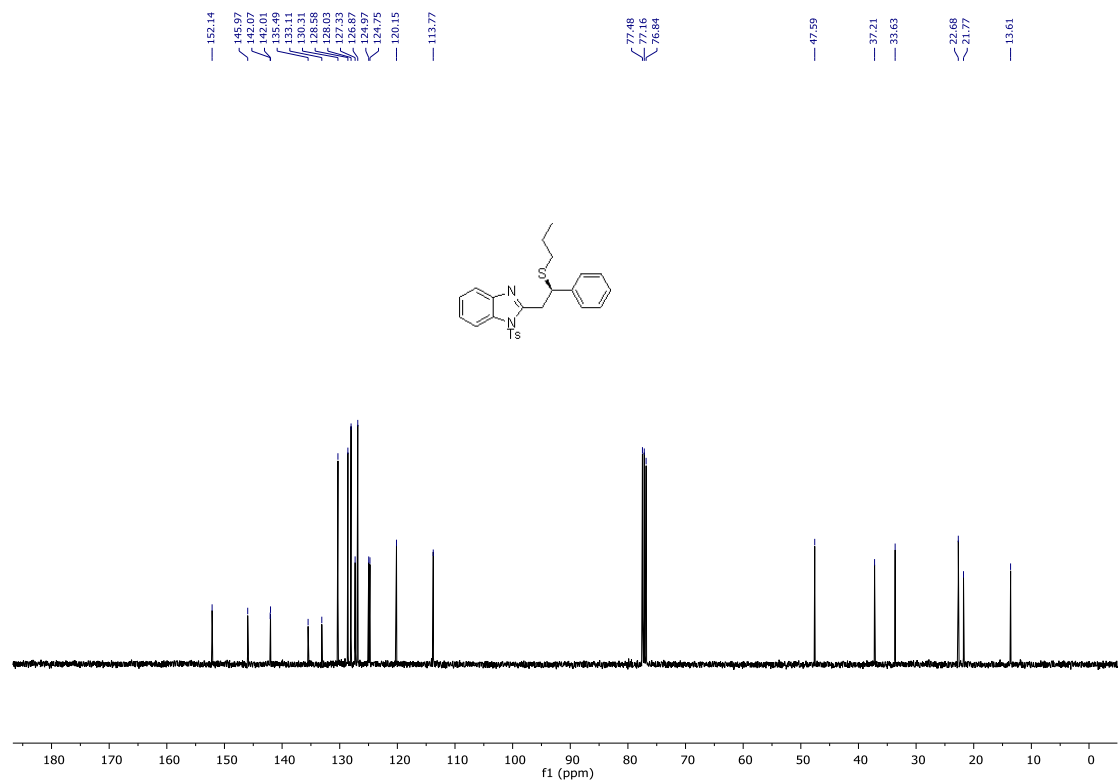



Spectra for **22**:

$^1\text{H}$  NMR:

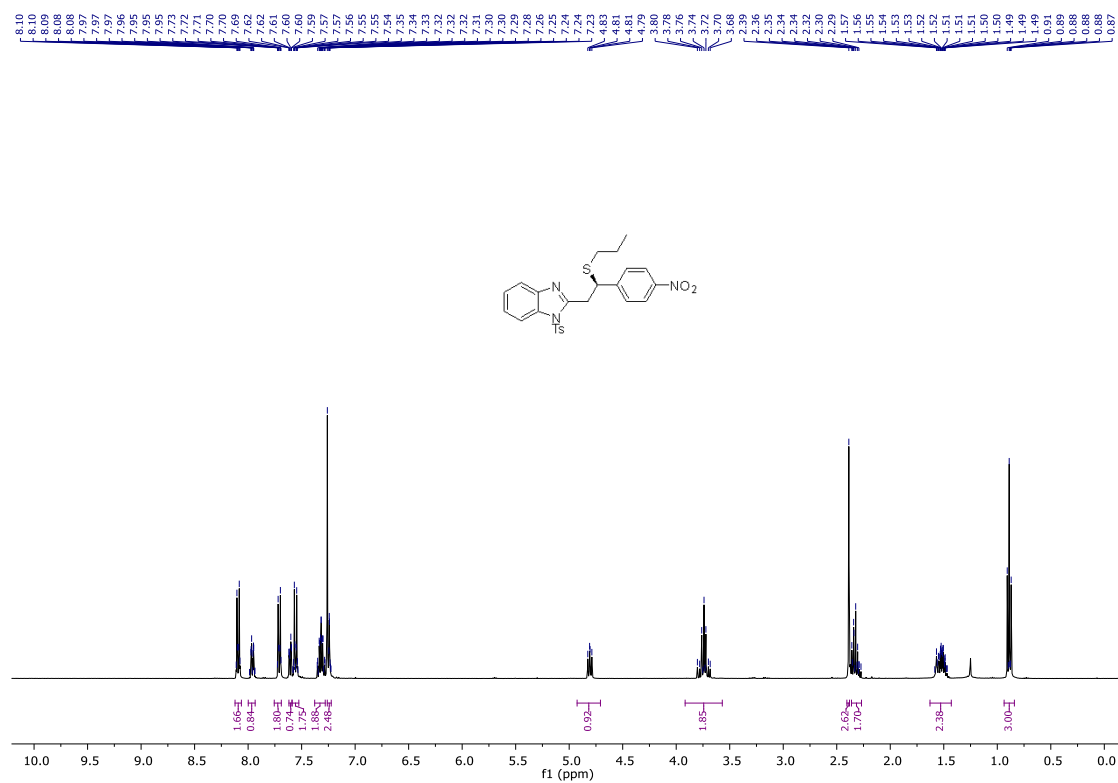

$^{13}\text{C}$  NMR:

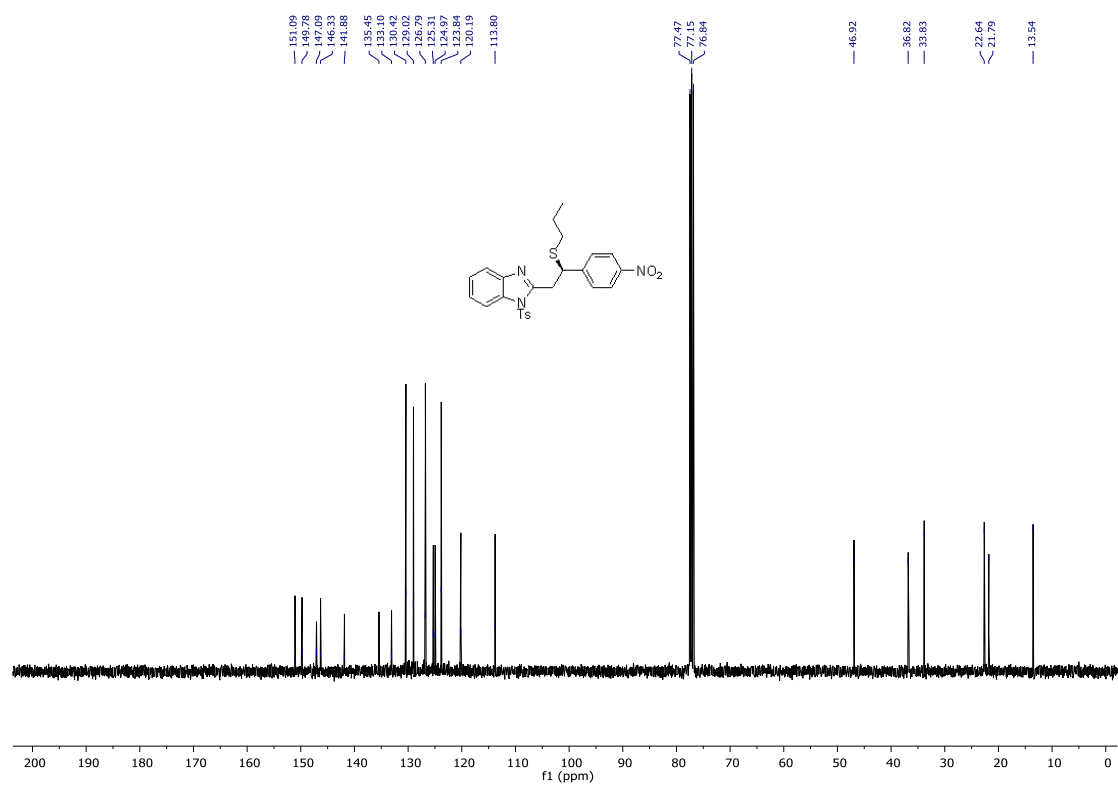

Spectra for **23**:

$^1\text{H}$  NMR:

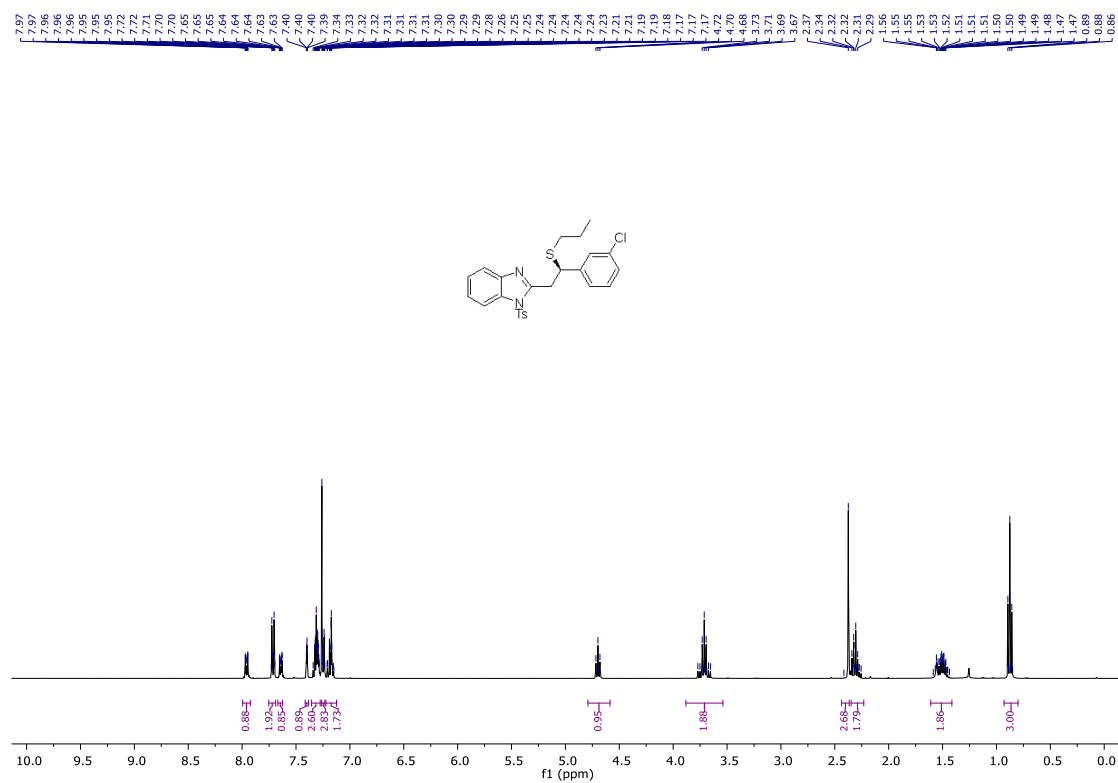

$^{13}\text{C}$  NMR:

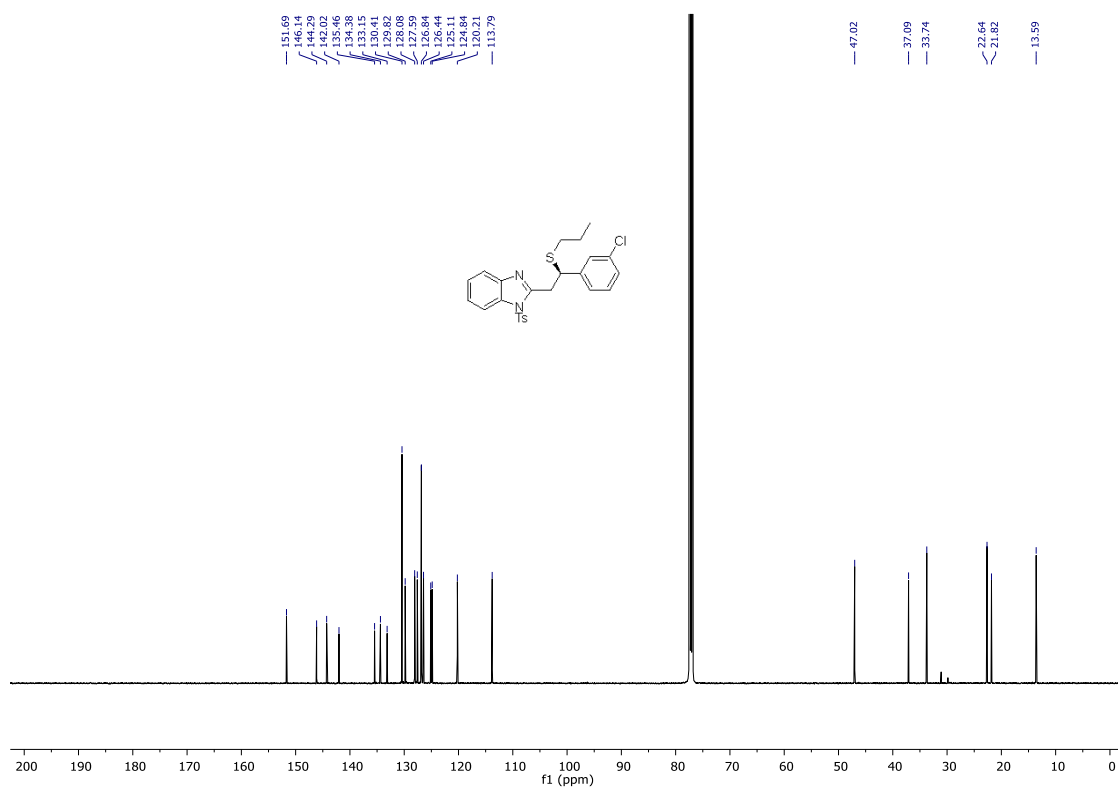

**Spectra for 24:**  
<sup>1</sup>H NMR:

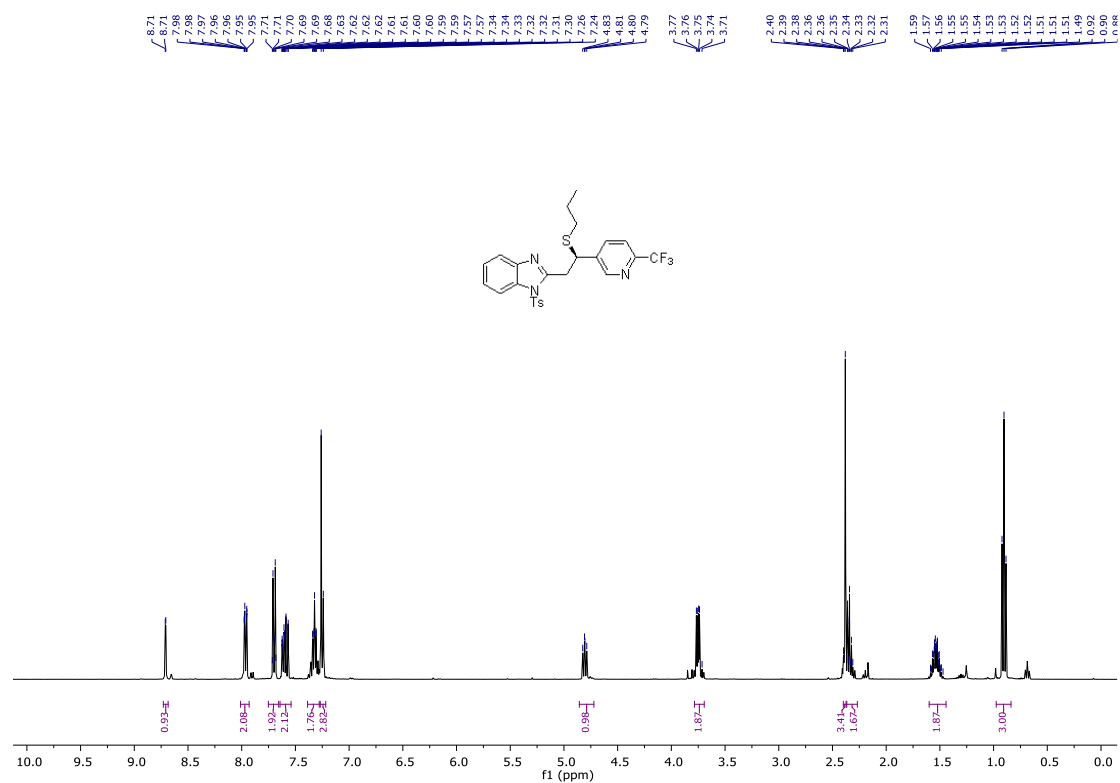

<sup>13</sup>C NMR:

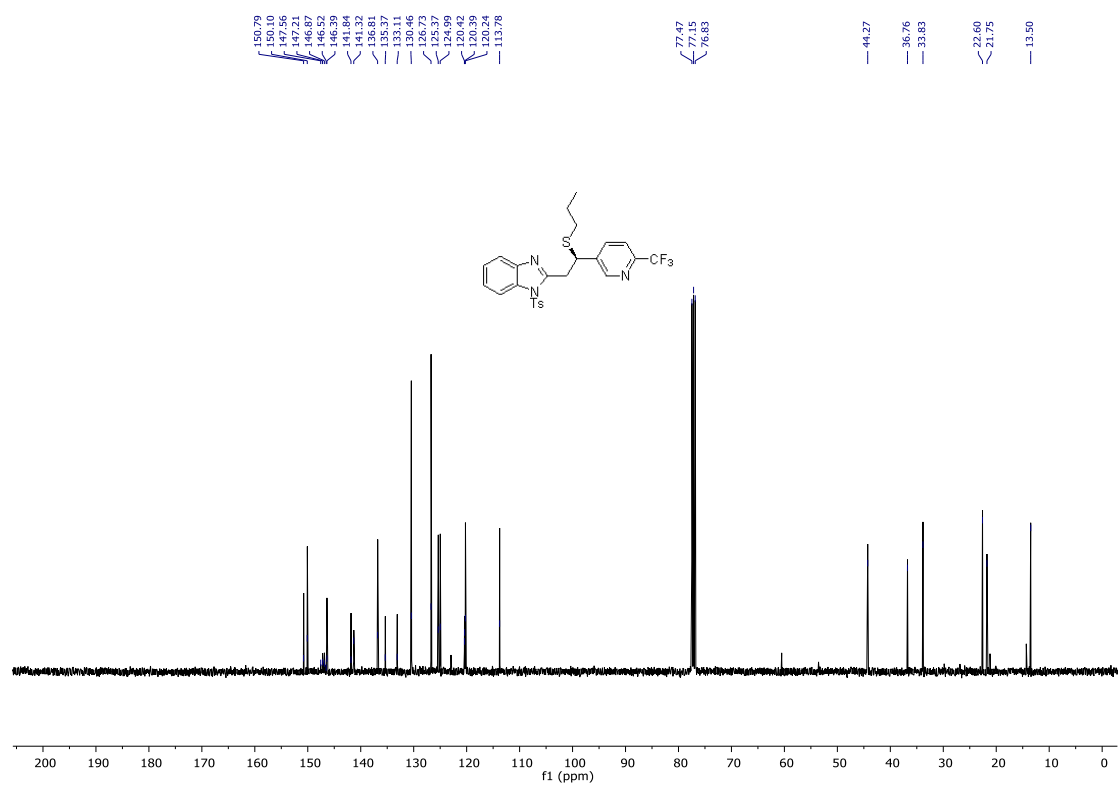



$^{19}\text{F}$  NMR:

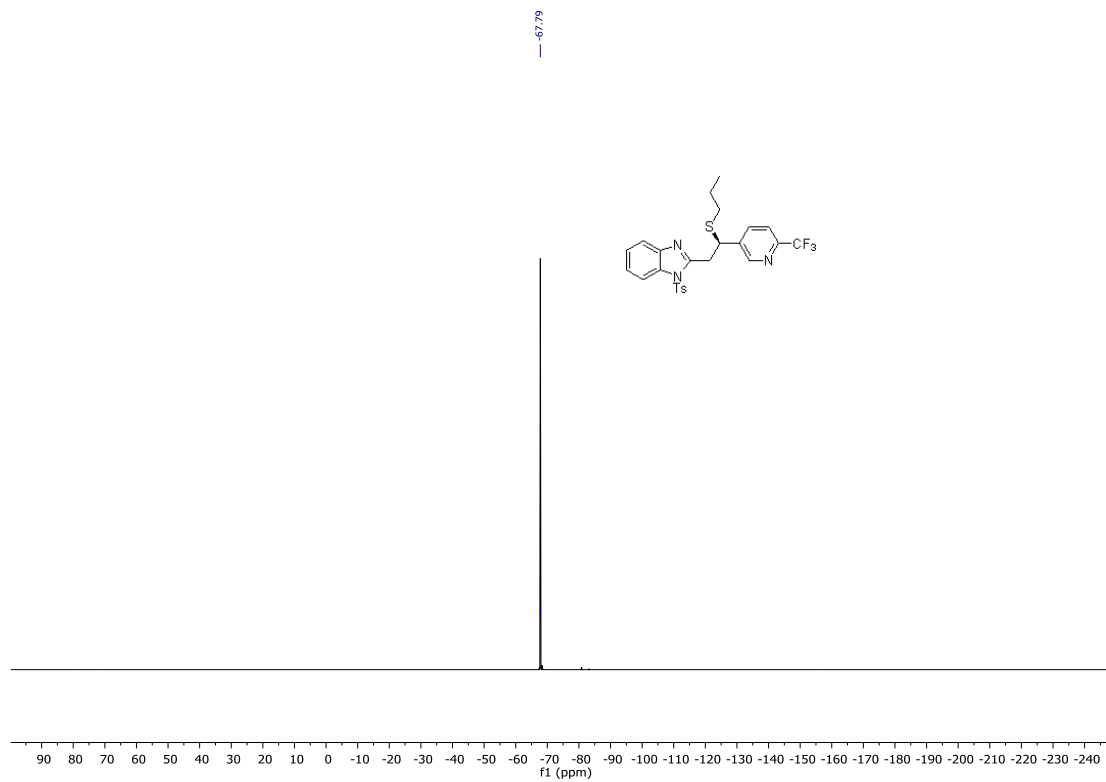

**Spectra for 25:**

**<sup>1</sup>H NMR:**

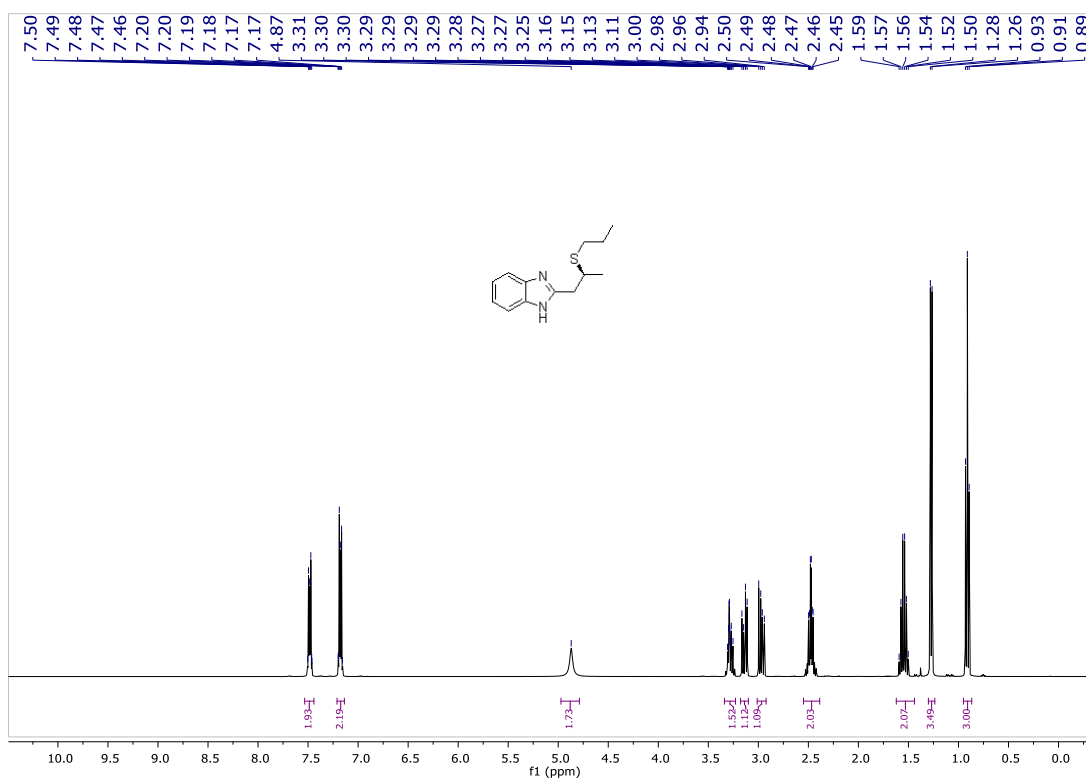

**<sup>13</sup>C NMR:**

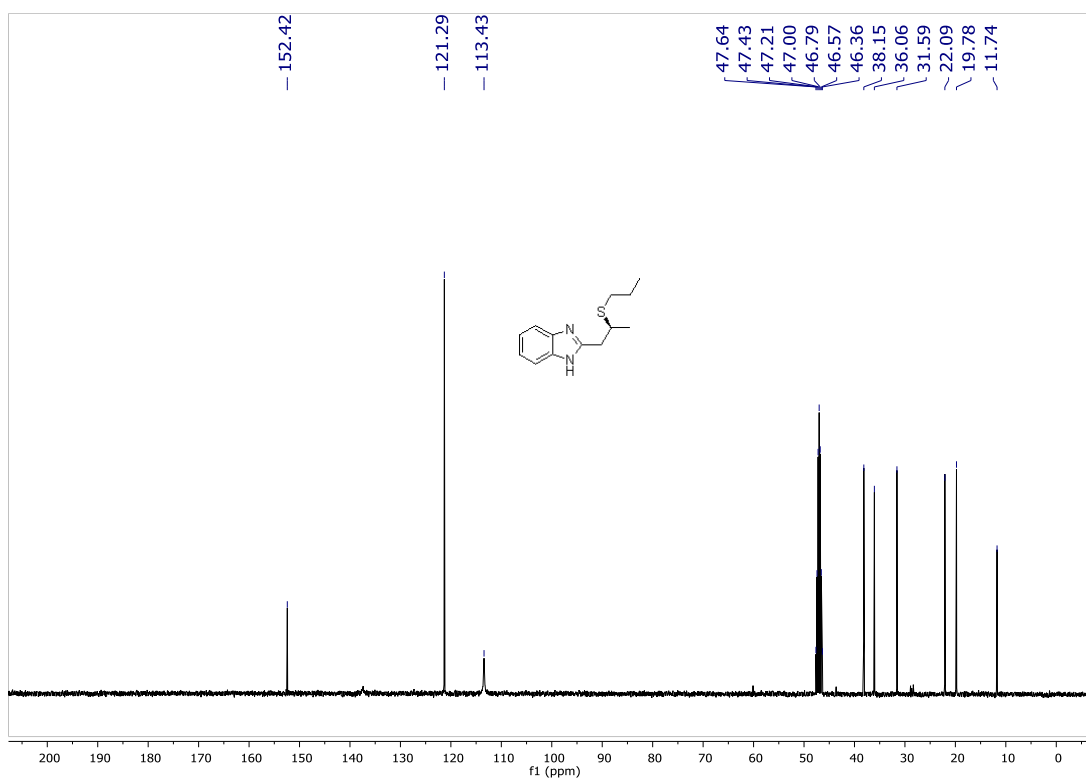

Spectra for **26**:

$^1\text{H}$  NMR:

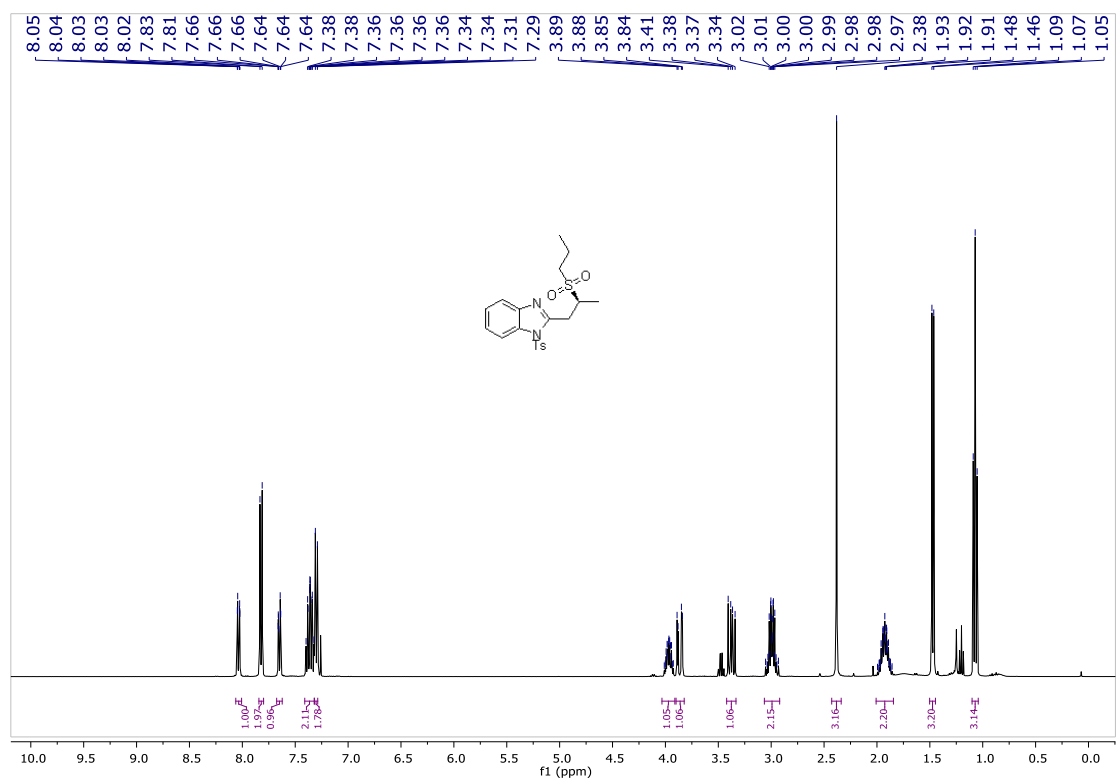

$^{13}\text{C}$  NMR:

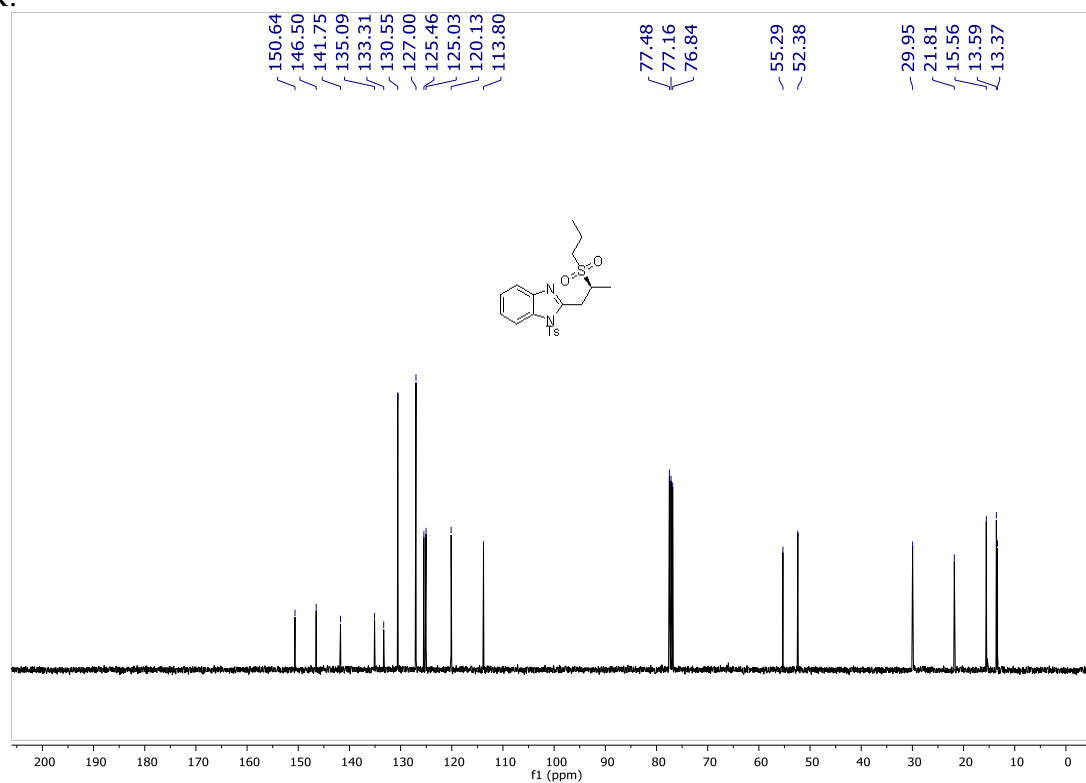

### Spectra for 27 (see footnote 15):

<sup>1</sup>H NMR:

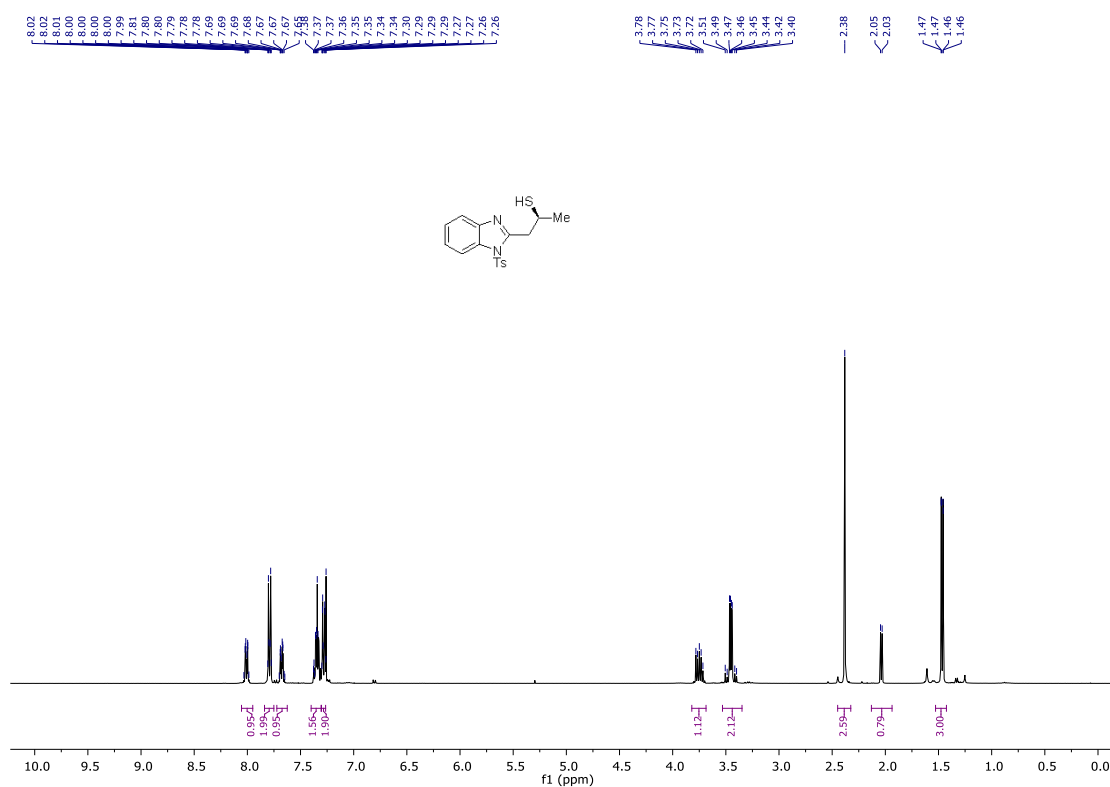

<sup>13</sup>C NMR:

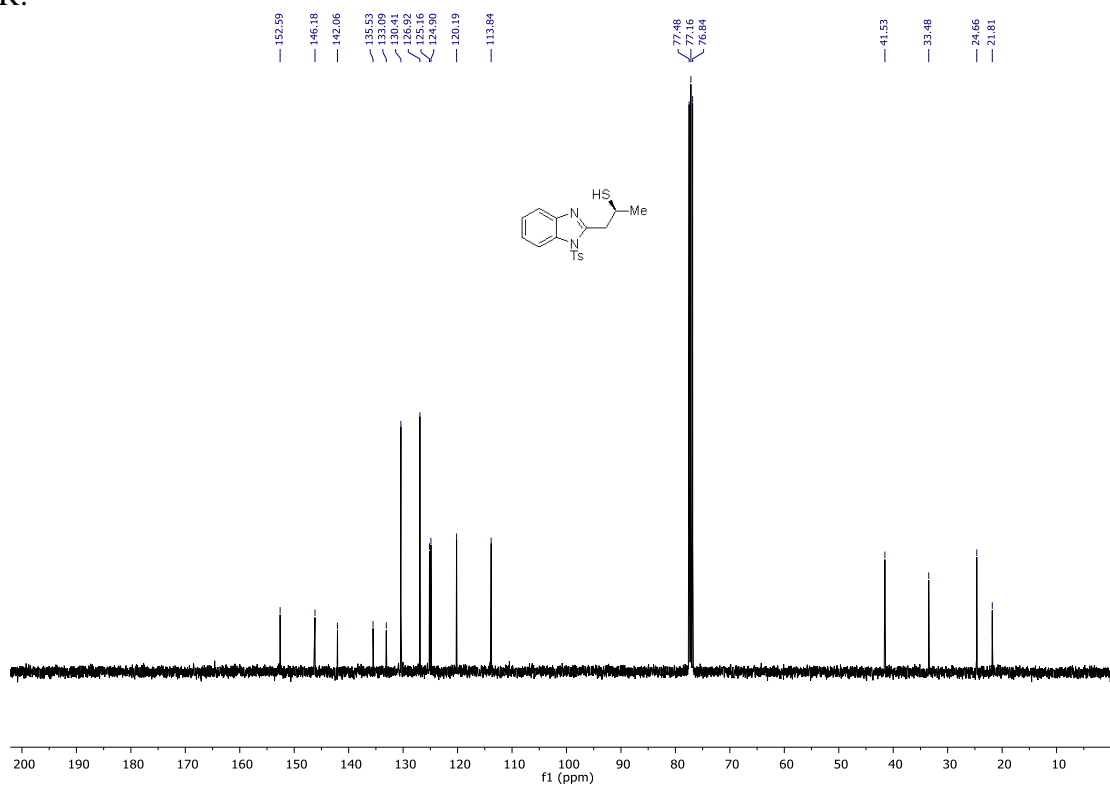

# Spectra for **28** (see footnote 16)

<sup>1</sup>H NMR:

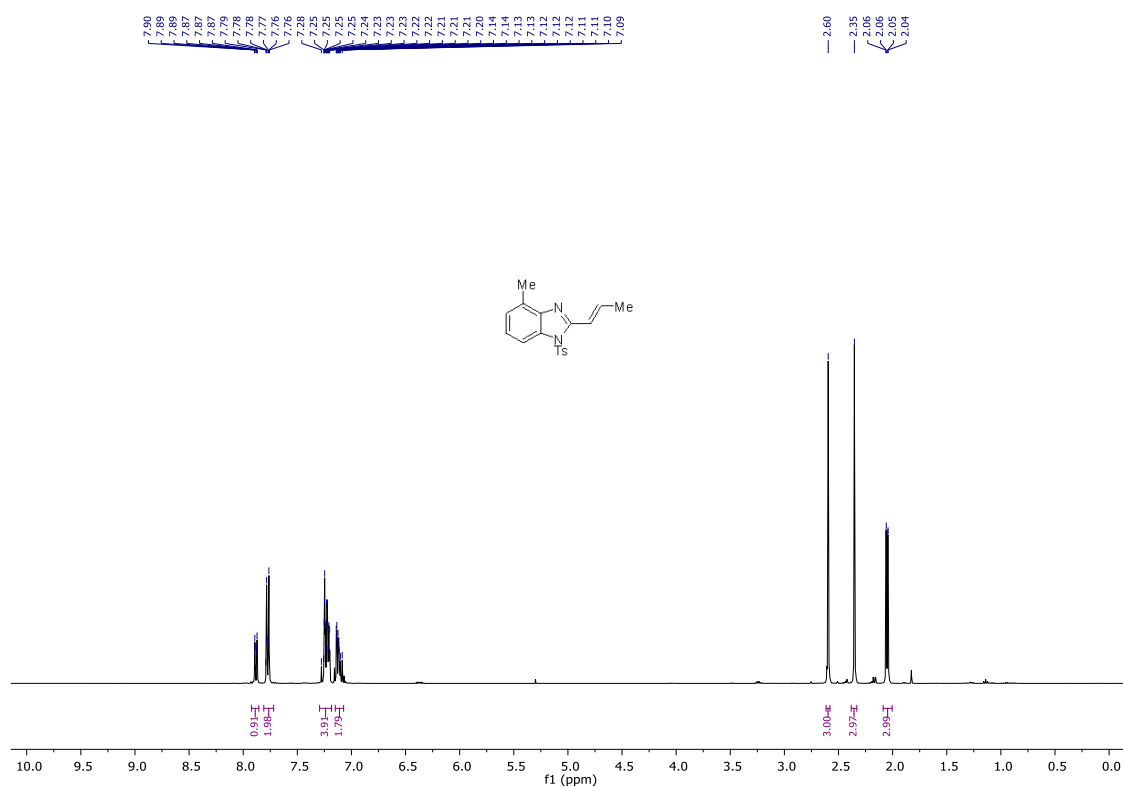

<sup>13</sup>C NMR:

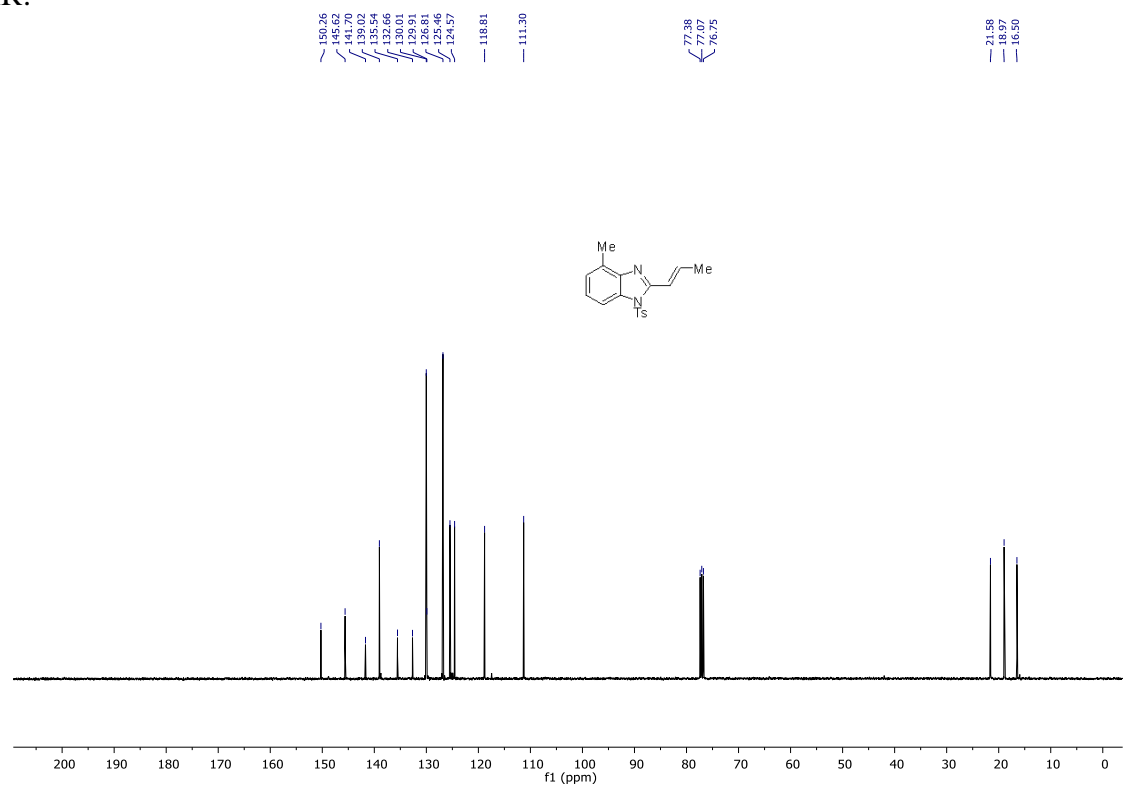

nOe:

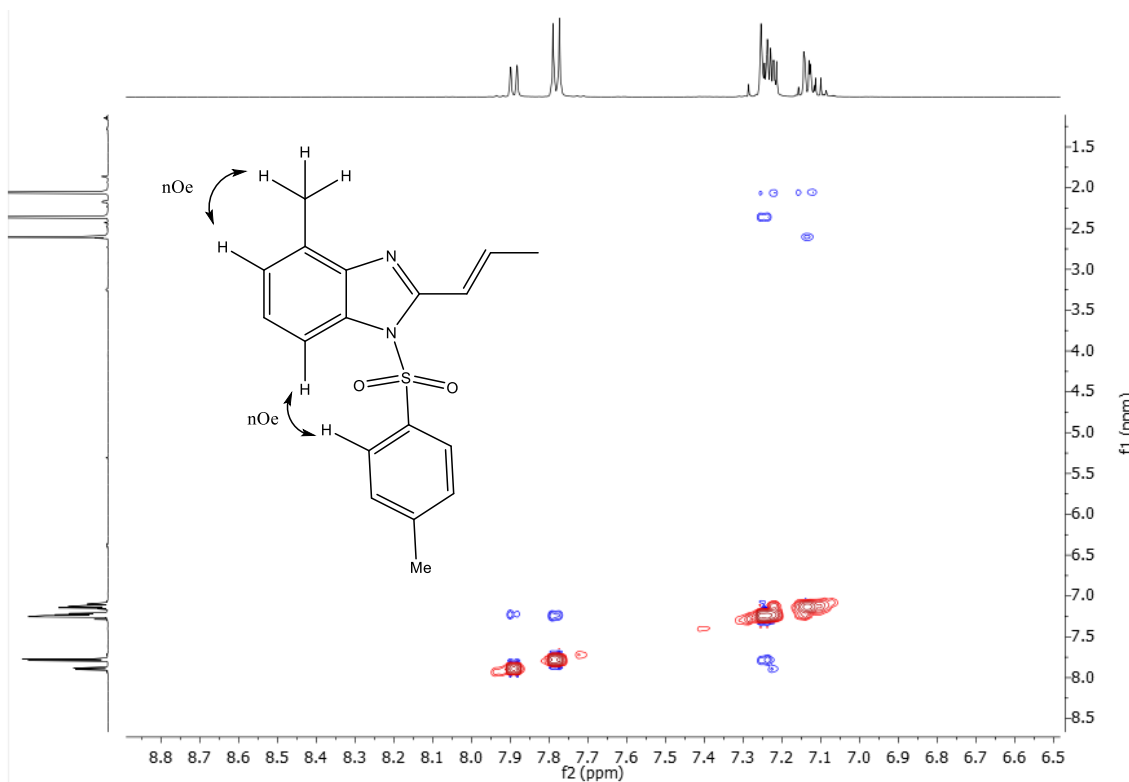

Spectra for **29** (see footnote 16)

$^1\text{H}$  NMR:

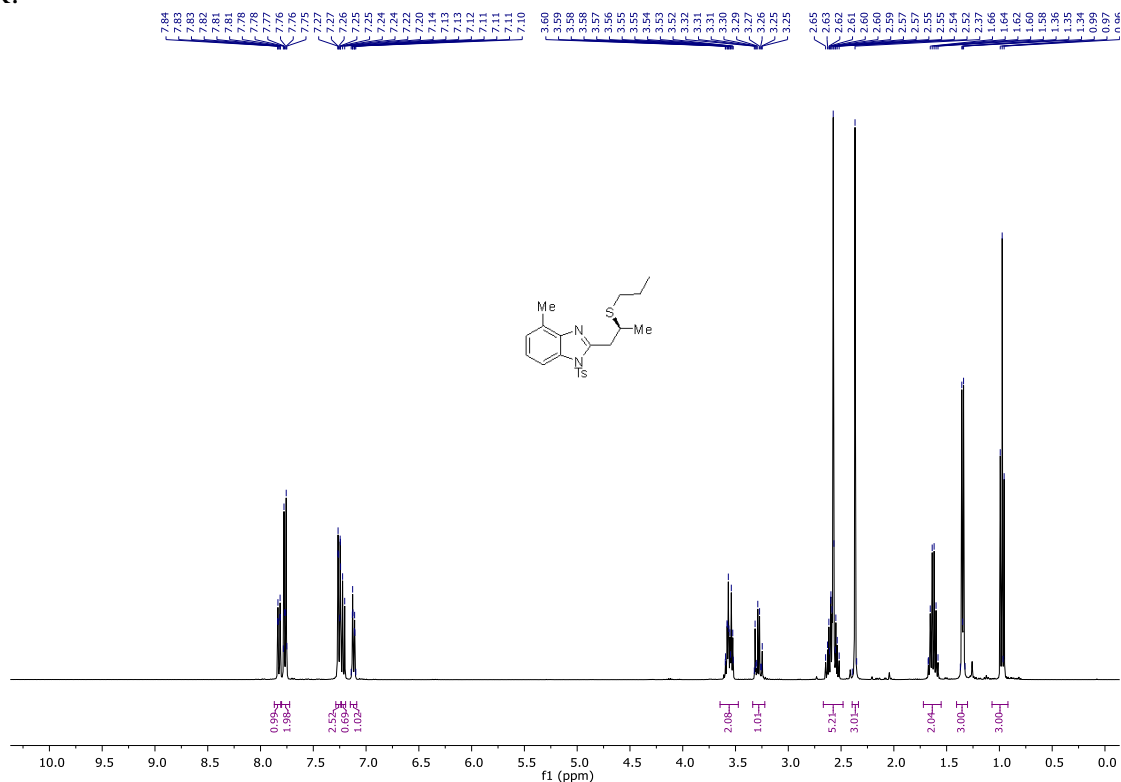

$^{13}\text{C}$  NMR:

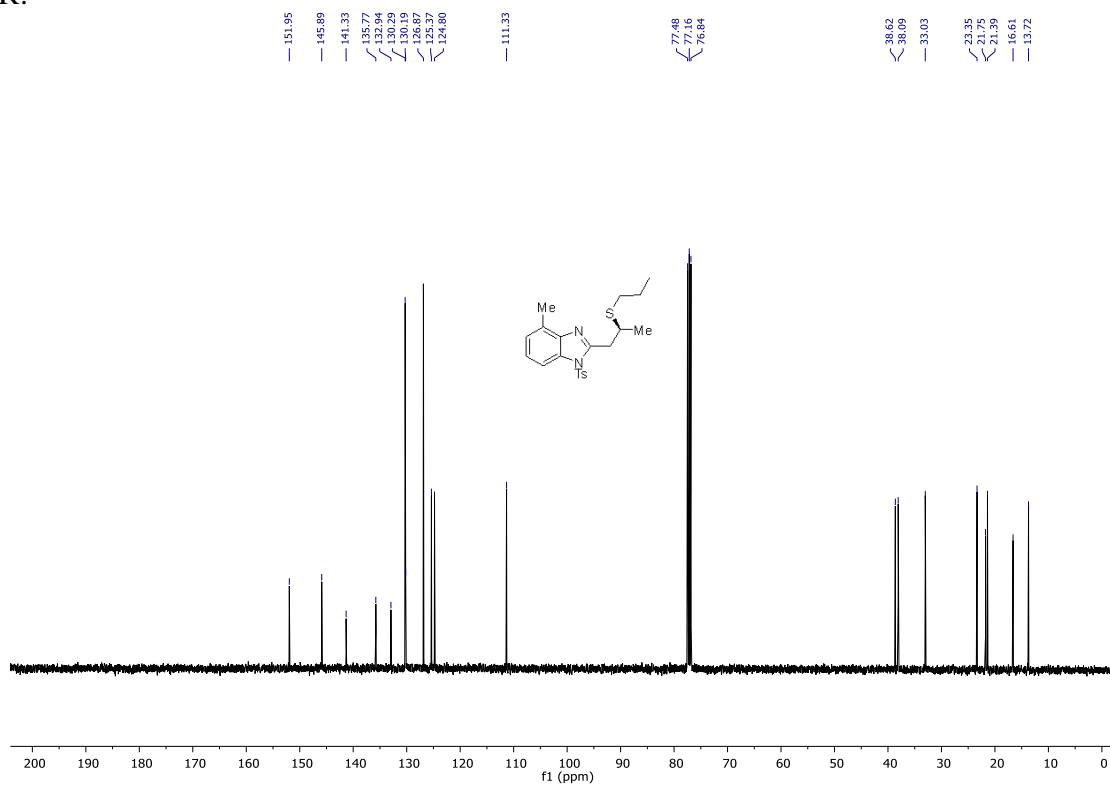

## 12/ HPLC traces

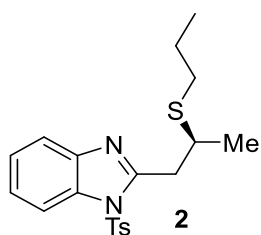

Racemic product

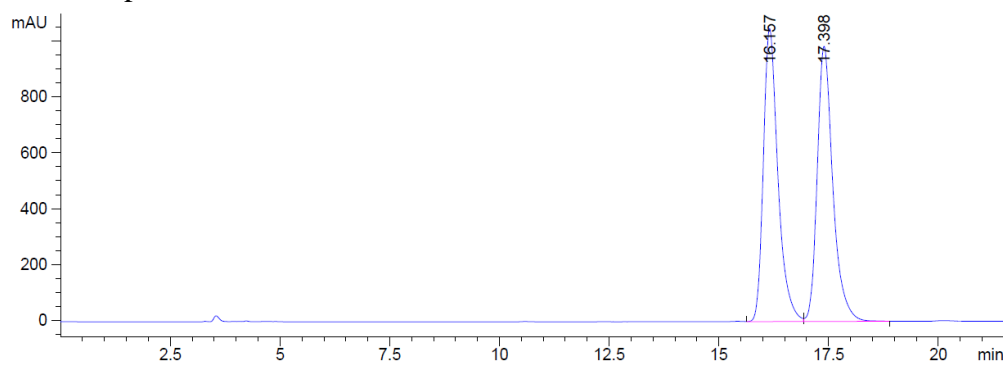

| # | Time   | Area    | Height | Width  | Area%  |
|---|--------|---------|--------|--------|--------|
| 1 | 16.157 | 24223.5 | 1048.9 | 0.3494 | 49.832 |
| 2 | 17.398 | 24387.3 | 984.8  | 0.3769 | 50.168 |

Enantioenriched product

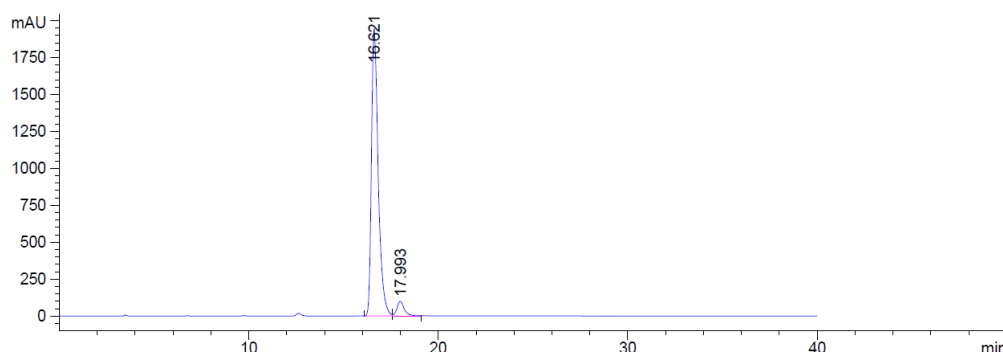

| # | Time   | Area    | Height | Width  | Area%  |
|---|--------|---------|--------|--------|--------|
| 1 | 16.621 | 48256.6 | 1944.9 | 0.3755 | 94.870 |
| 2 | 17.993 | 2609.2  | 98.9   | 0.3998 | 5.130  |



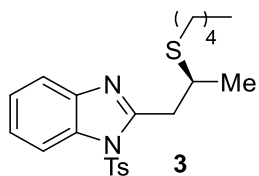

### Racemic product

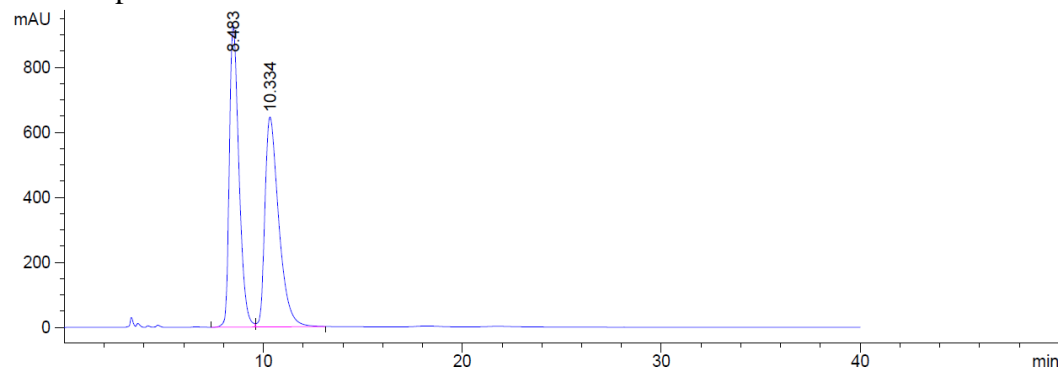

| # | Time   | Area    | Height   | Width  | Area%  |
|---|--------|---------|----------|--------|--------|
| 1 | 8.483  | 31084.0 | 927.7141 | 0.5149 | 49.864 |
| 2 | 10.334 | 31254.6 | 645.9370 | 0.7345 | 50.136 |

### Enantioenriched product

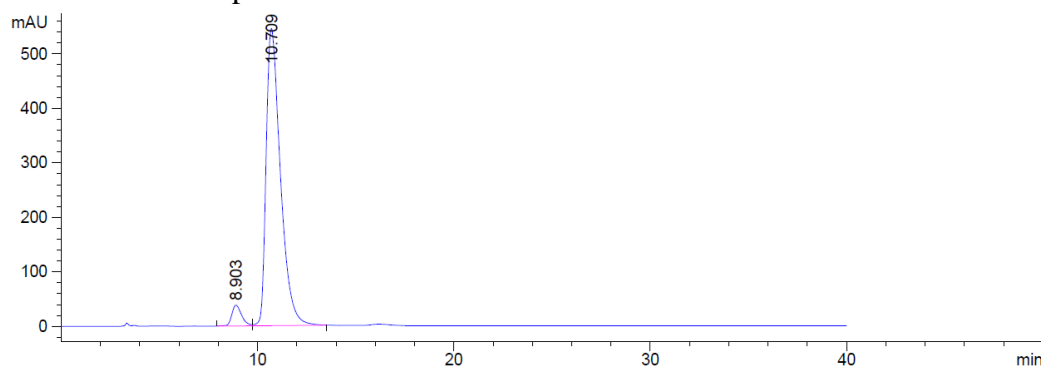

| # | Time   | Area    | Height   | Width  | Area%  |
|---|--------|---------|----------|--------|--------|
| 1 | 8.903  | 1339.9  | 38.2640  | 0.5366 | 4.636  |
| 2 | 10.709 | 27562.5 | 545.5766 | 0.7674 | 95.364 |

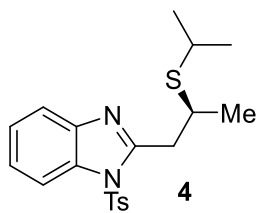

Racemic product

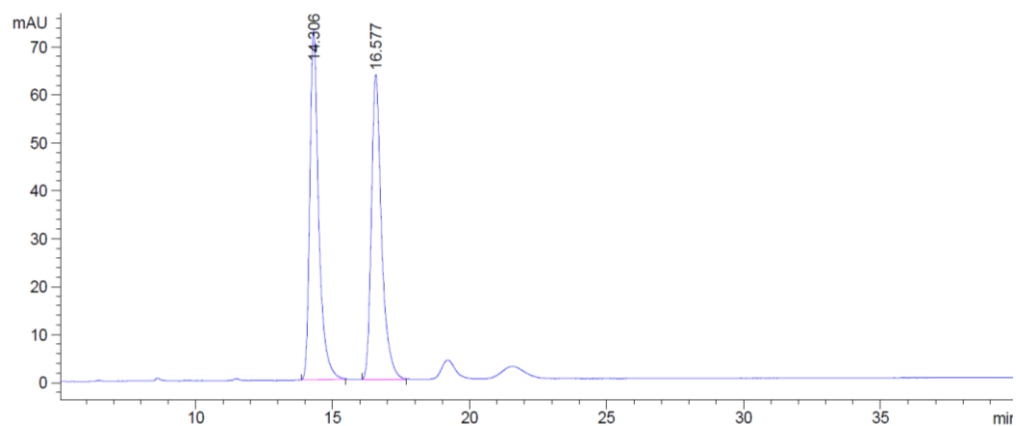

| # | Time   | Area   | Height  | Width  | Area%  |
|---|--------|--------|---------|--------|--------|
| 1 | 14.306 | 1649.7 | 72.7986 | 0.3384 | 50.052 |
| 2 | 16.577 | 1646.3 | 63.5925 | 0.3900 | 49.948 |

Enantioenriched product

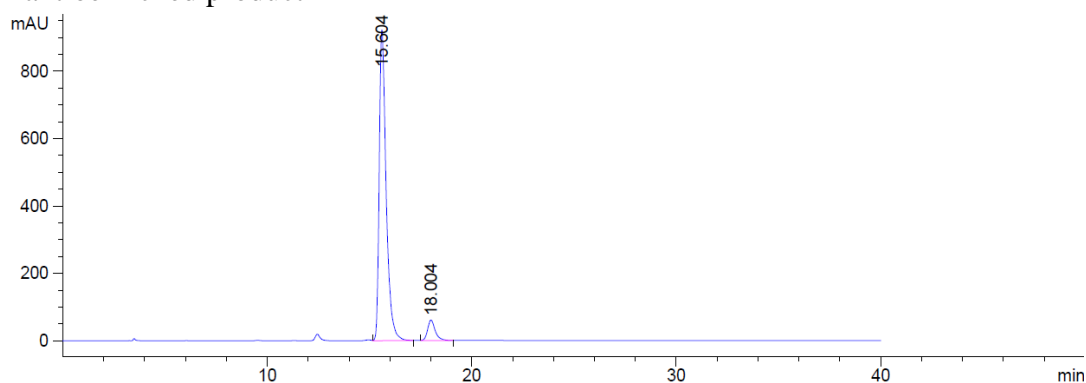

| # | Time   | Area    | Height   | Width  | Area%  |
|---|--------|---------|----------|--------|--------|
| 1 | 15.604 | 21620.1 | 922.3245 | 0.3535 | 93.202 |
| 2 | 18.004 | 1576.8  | 60.8959  | 0.3901 | 6.798  |

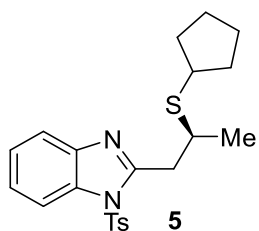

**Racemic product**

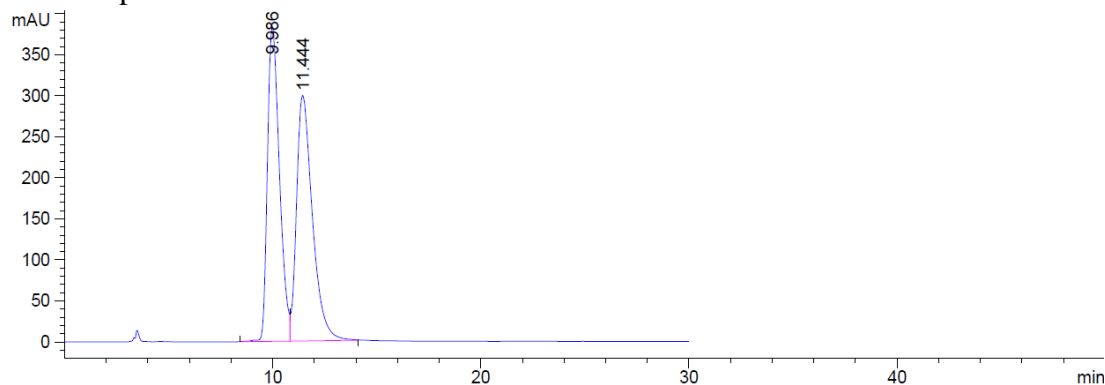

| # | Time   | Area    | Height   | Width  | Area%  |
|---|--------|---------|----------|--------|--------|
| 1 | 9.986  | 15351.7 | 383.4876 | 0.6190 | 49.182 |
| 2 | 11.444 | 15862.2 | 299.1960 | 0.8025 | 50.817 |

**Enantioenriched product**

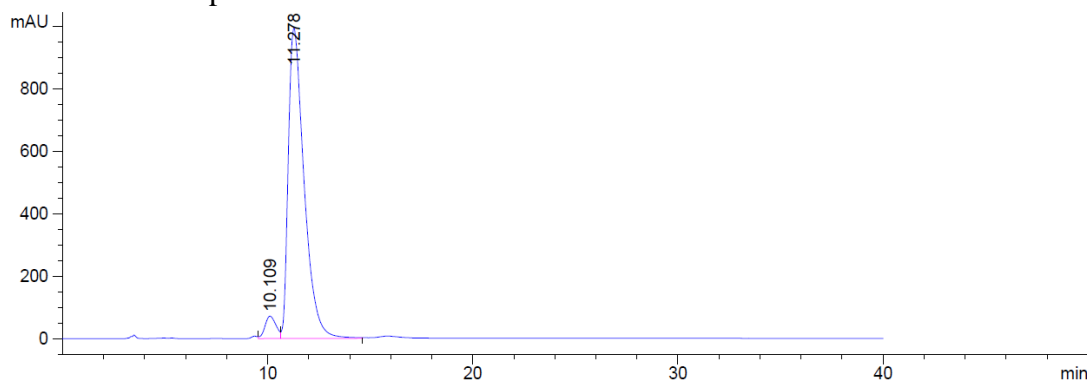

| # | Time   | Area    | Height   | Width  | Area%  |
|---|--------|---------|----------|--------|--------|
| 1 | 10.109 | 2658.4  | 71.6780  | 0.5827 | 4.764  |
| 2 | 11.278 | 53146.0 | 994.2653 | 0.8156 | 95.236 |

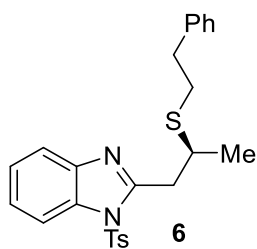

Racemic product

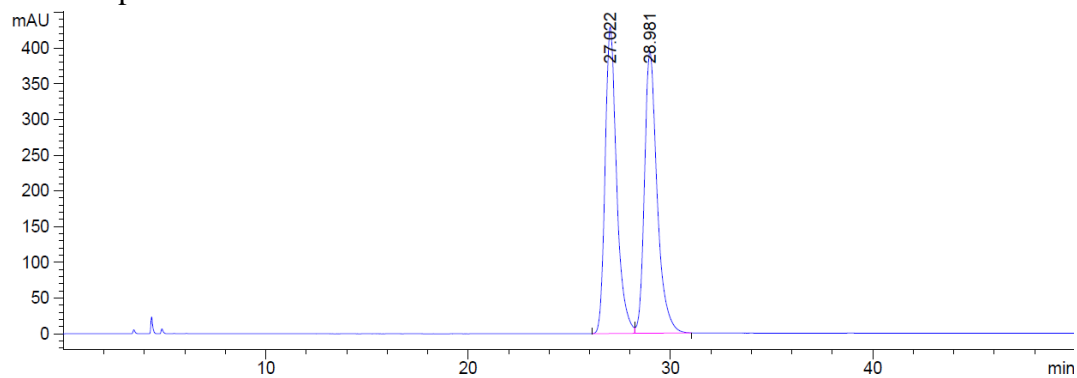

| # | Time   | Area    | Height   | Width  | Area%  |
|---|--------|---------|----------|--------|--------|
| 1 | 27.022 | 17032.2 | 429.5468 | 0.6026 | 49.755 |
| 2 | 28.981 | 17200.1 | 395.7534 | 0.6571 | 50.245 |

Enantioenriched product

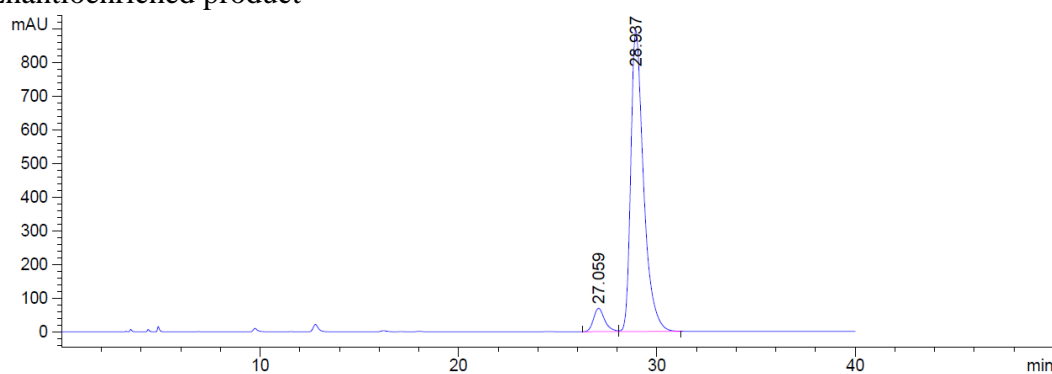

| # | Time   | Area    | Height   | Width  | Area%  |
|---|--------|---------|----------|--------|--------|
| 1 | 27.059 | 2723.8  | 69.5989  | 0.5926 | 6.351  |
| 2 | 28.937 | 40161.7 | 895.2585 | 0.6754 | 93.649 |

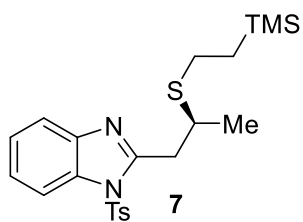

**Racemic product**

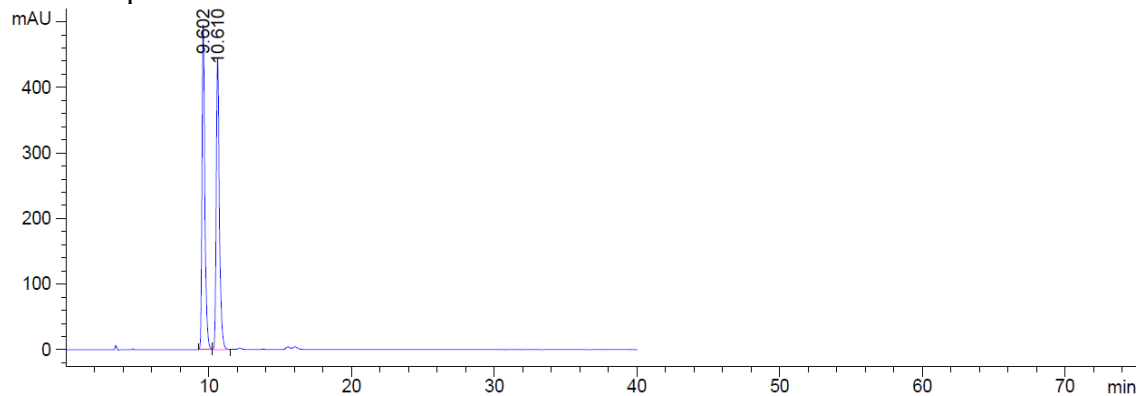

| # | Time   | Area   | Height   | Width  | Area%  |
|---|--------|--------|----------|--------|--------|
| 1 | 9.602  | 6850.8 | 495.3327 | 0.2074 | 49.918 |
| 2 | 10.610 | 6873.3 | 443.6841 | 0.2327 | 50.082 |

**Enantioenriched product**

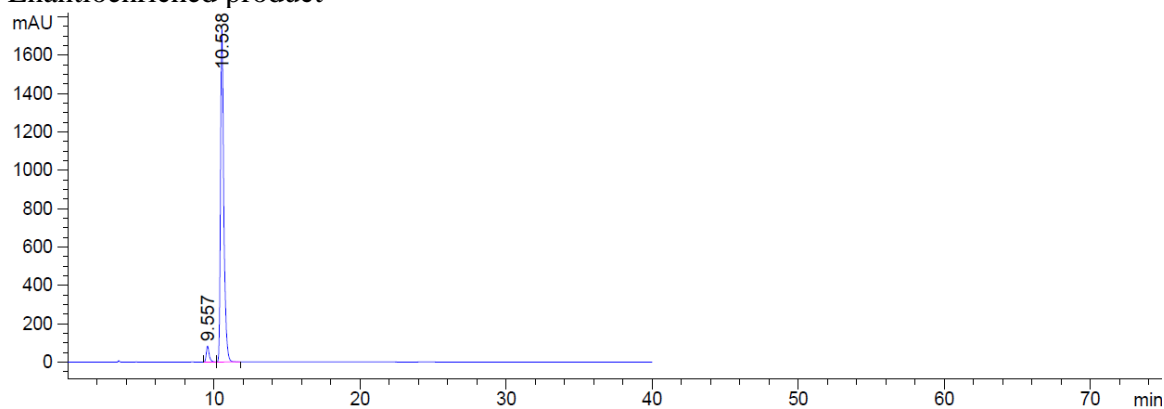

| # | Time   | Area    | Height    | Width  | Area%  |
|---|--------|---------|-----------|--------|--------|
| 1 | 9.557  | 1134.6  | 83.2183   | 0.2051 | 4.002  |
| 2 | 10.538 | 27218.6 | 1733.9081 | 0.2371 | 95.998 |

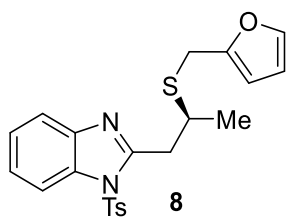

Racemic product

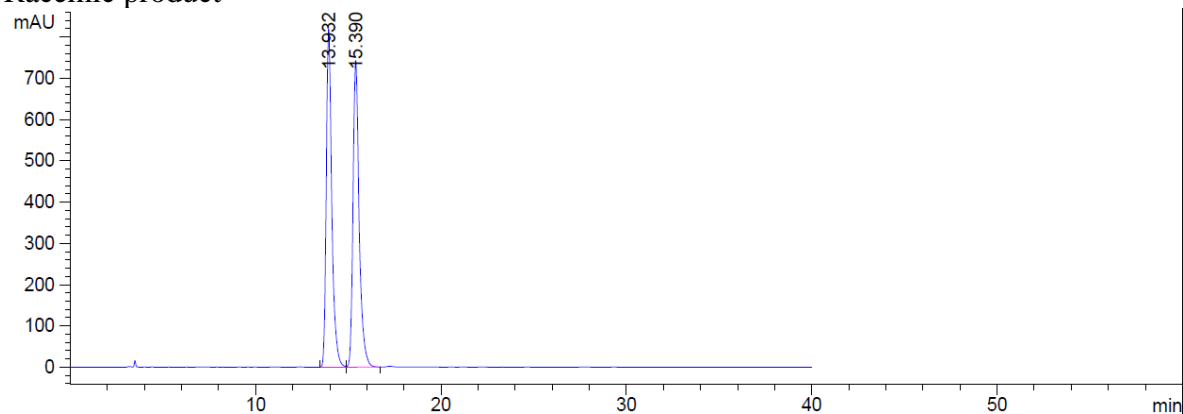

| # | Time   | Area    | Height   | Width  | Area%  |
|---|--------|---------|----------|--------|--------|
| 1 | 13.932 | 17002.3 | 818.9419 | 0.6141 | 49.852 |
| 2 | 15.390 | 17103.1 | 742.4780 | 0.6970 | 50.148 |

Enantioenriched product

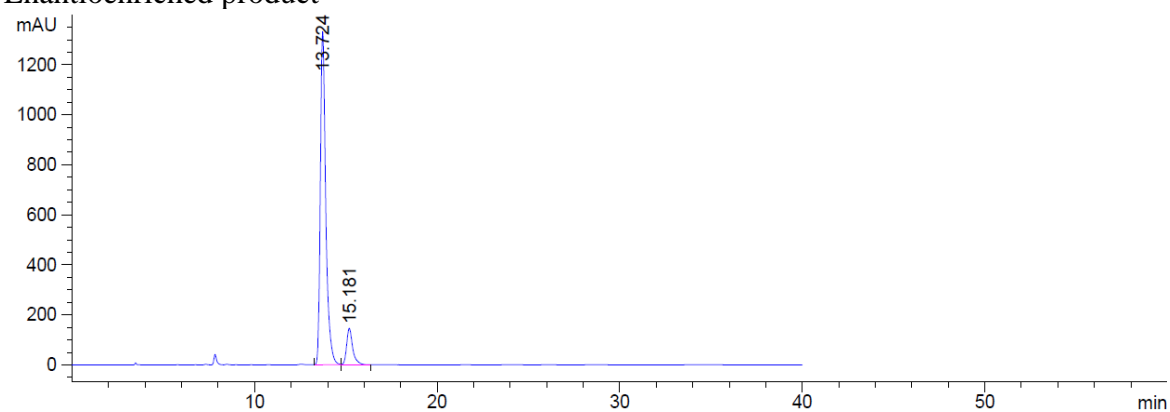

| # | Time   | Area    | Height   | Width  | Area%  |
|---|--------|---------|----------|--------|--------|
| 1 | 13.724 | 27589.1 | 818.9419 | 0.3115 | 89.106 |
| 2 | 15.181 | 3373.0  | 742.4780 | 0.3458 | 10.894 |

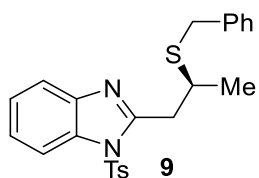

Racemic product

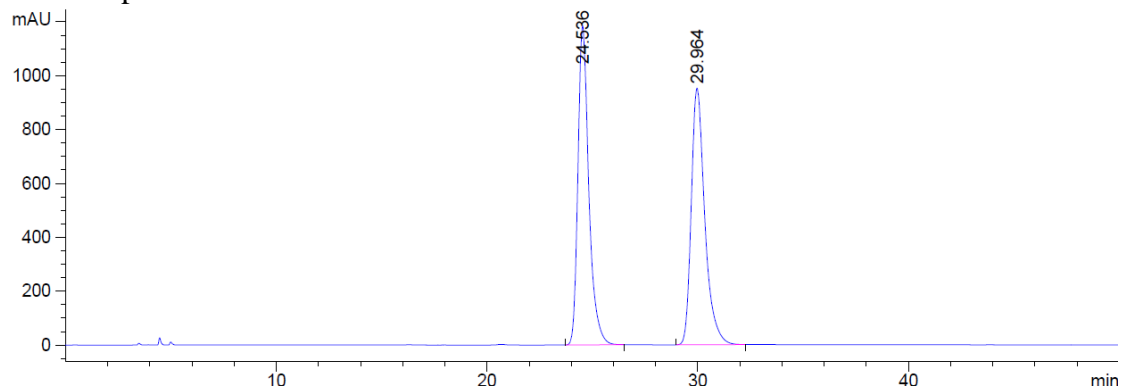

| # | Time   | Area    | Height    | Width  | Area%  |
|---|--------|---------|-----------|--------|--------|
| 1 | 24.536 | 42477.2 | 1184.4417 | 0.5424 | 49.978 |
| 2 | 29.964 | 42515.1 | 952.5371  | 0.6727 | 50.022 |

Enantioenriched product

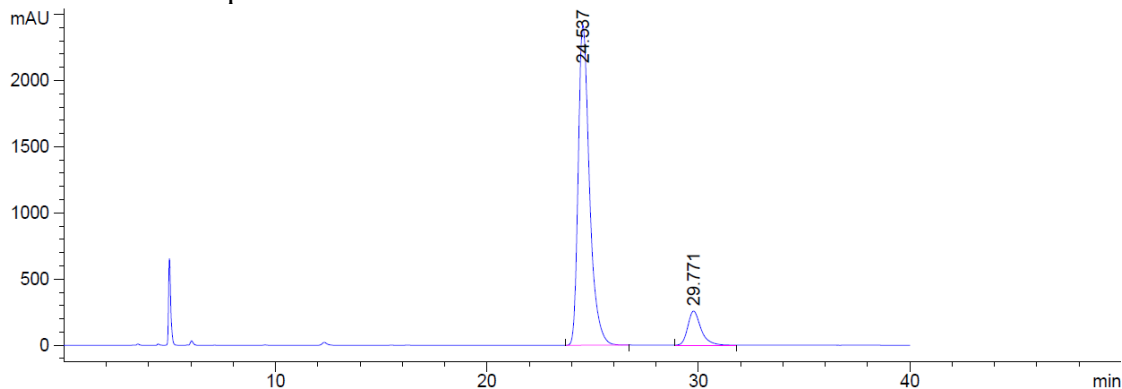

| # | Time   | Area    | Height    | Width  | Area%  |
|---|--------|---------|-----------|--------|--------|
| 1 | 24.592 | 89767.9 | 2418.4070 | 0.5651 | 88.989 |
| 2 | 29.766 | 11107.6 | 257.3401  | 0.6516 | 11.011 |

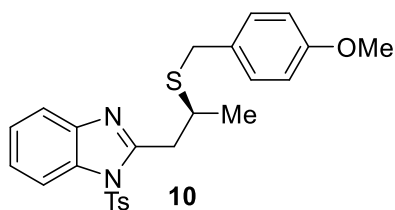

Racemic product

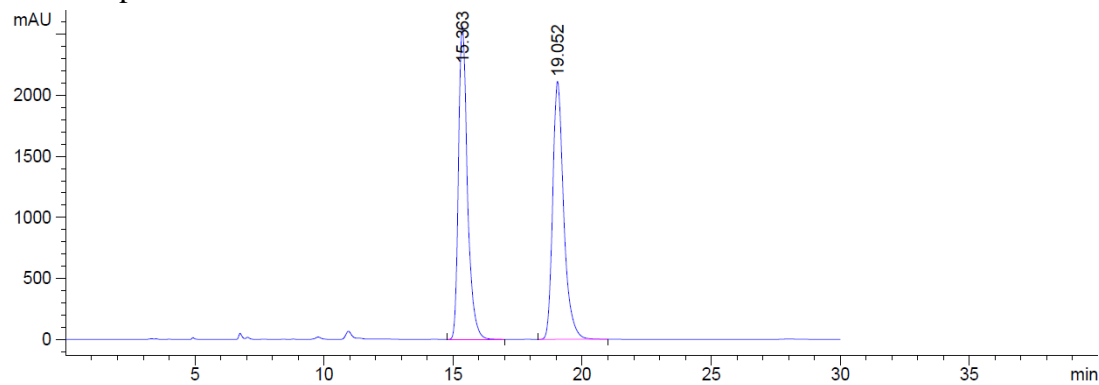

| # | Time   | Area    | Height    | Width  | Area%  |
|---|--------|---------|-----------|--------|--------|
| 1 | 15.363 | 62104.3 | 2568.3023 | 0.3701 | 49.691 |
| 2 | 19.052 | 62877.0 | 2114.1353 | 0.4510 | 50.309 |

Enantioenriched product

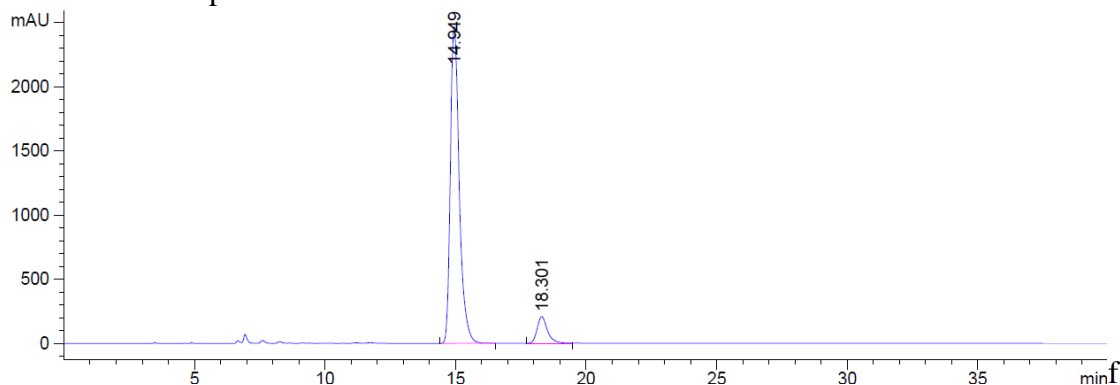

| # | Time   | Area    | Height    | Width  | Area%  |
|---|--------|---------|-----------|--------|--------|
| 1 | 14.949 | 58773.1 | 2465.8980 | 0.3661 | 91.193 |
| 2 | 18.301 | 5676.0  | 207.8852  | 0.4145 | 8.807  |



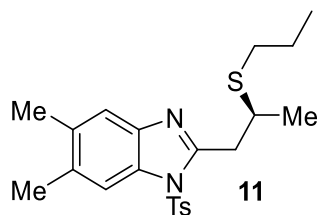

Racemic compound

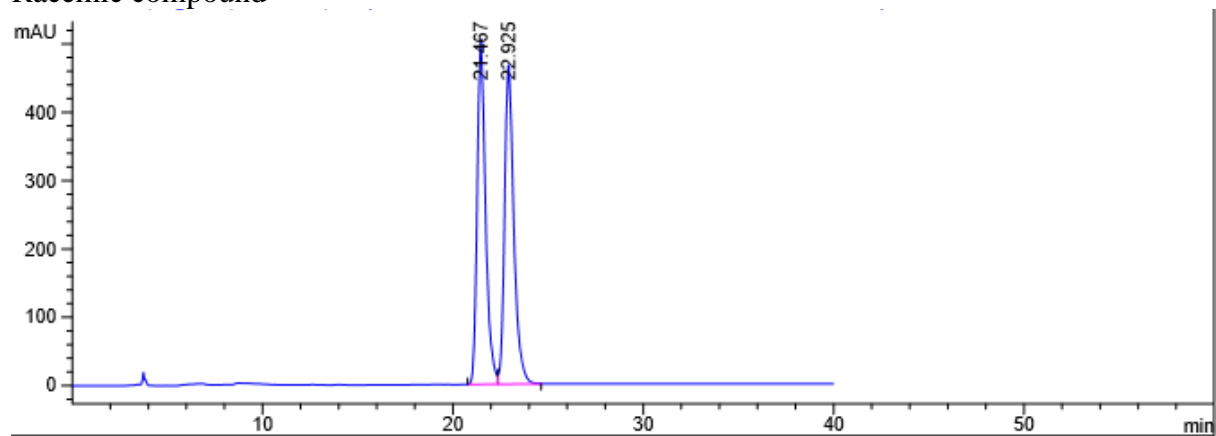

| # | Time   | Area      | Height    | Width  | Area%   |
|---|--------|-----------|-----------|--------|---------|
| 1 | 21.467 | 1.55473e4 | 505.28189 | 0.4670 | 49.6855 |
| 2 | 22.925 | 1.57441e4 | 466.74344 | 0.5095 | 50.3145 |

Enantioenriched compound

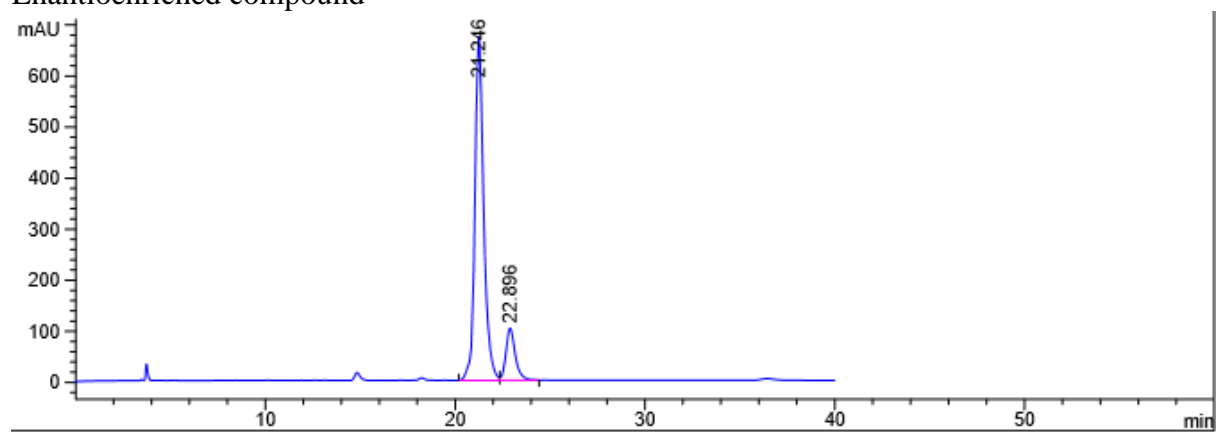

| # | Time   | Area       | Height    | Width  | Area%   |
|---|--------|------------|-----------|--------|---------|
| 1 | 21.246 | 2.17454e4  | 673.19257 | 0.4849 | 86.2196 |
| 2 | 22.896 | 3475.55786 | 101.73867 | 0.5186 | 13.7804 |

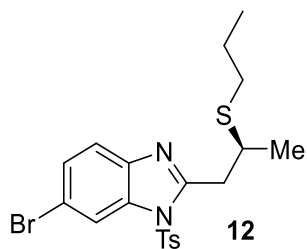

Racemic compound

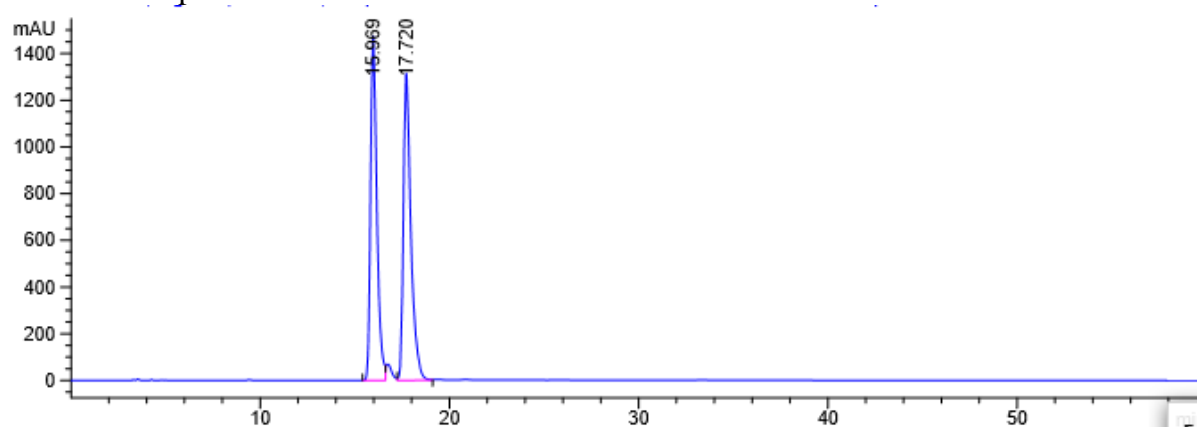

| # | Time   | Area      | Height     | Width  | Area%   |
|---|--------|-----------|------------|--------|---------|
| 1 | 15.969 | 3.43880e4 | 1475.41064 | 0.3559 | 48.7907 |
| 2 | 17.720 | 3.60927e4 | 1313.82422 | 0.4085 | 51.2093 |

Enantioenriched compound

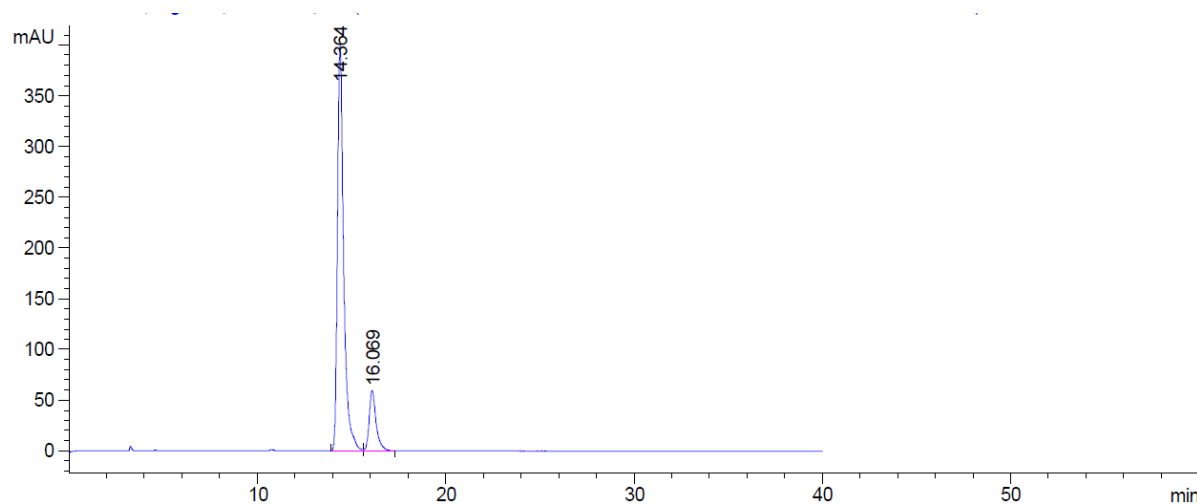

| # | Time   | Area      | Height    | Width  | Area%   |
|---|--------|-----------|-----------|--------|---------|
| 1 | 14.364 | 206.9619  | 399.40341 | 0.3449 | 85.8882 |
| 2 | 16.069 | 1512.7382 | 59.37542  | 0.3812 | 14.1118 |

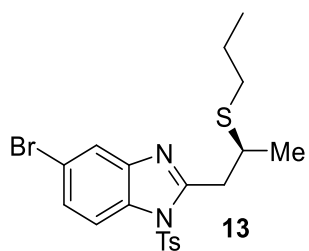

Racemic compound

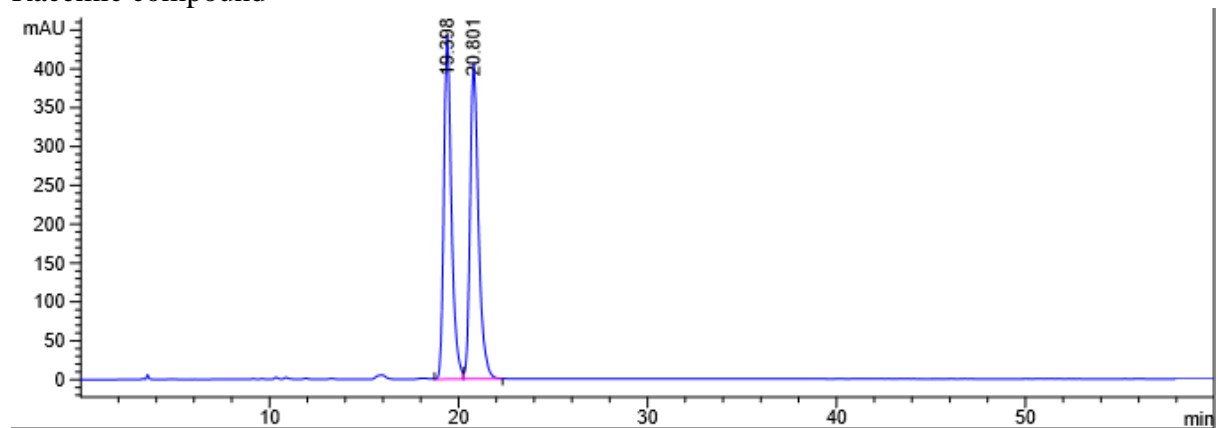

| # | Time   | Area      | Height    | Width  | Area%   |
|---|--------|-----------|-----------|--------|---------|
| 1 | 19.398 | 1.24443e4 | 442.41595 | 0.4282 | 49.7842 |
| 2 | 20.801 | 1.25521e4 | 407.14053 | 0.4637 | 50.2158 |

Enantioenriched compound

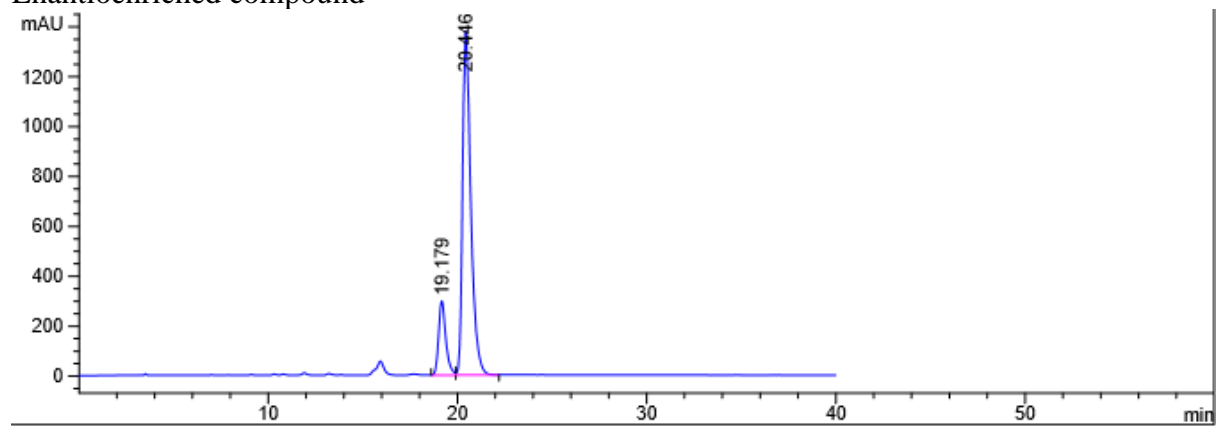

| # | Time   | Area       | Height     | Width  | Area%   |
|---|--------|------------|------------|--------|---------|
| 1 | 19.179 | 7845.54053 | 296.33978  | 0.4009 | 15.8078 |
| 2 | 20.446 | 4.17853e4  | 1379.10303 | 0.4575 | 84.1922 |

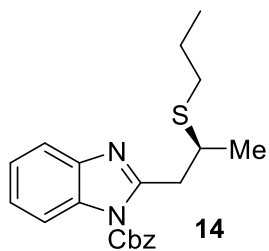

### Racemic product

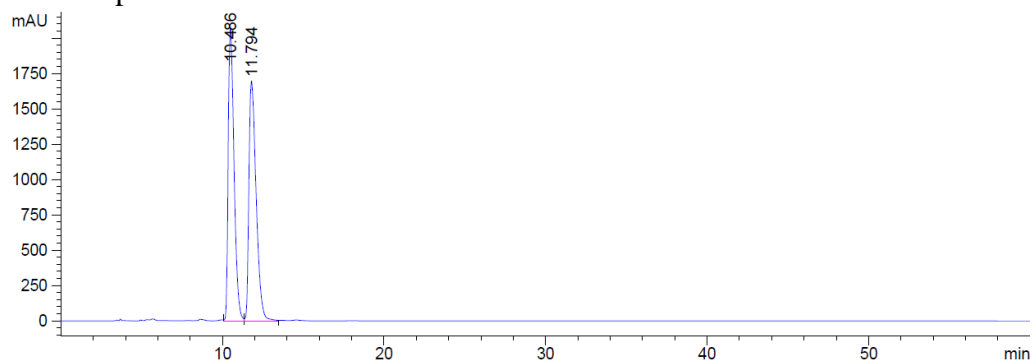

| # | Time   | Area    | Height | Width  | Area%  |
|---|--------|---------|--------|--------|--------|
| 1 | 10.486 | 52056.1 | 2079.6 | 0.3880 | 49.664 |
| 2 | 11.794 | 52759.6 | 1696.7 | 0.4808 | 50.336 |

### Enantioenriched Product

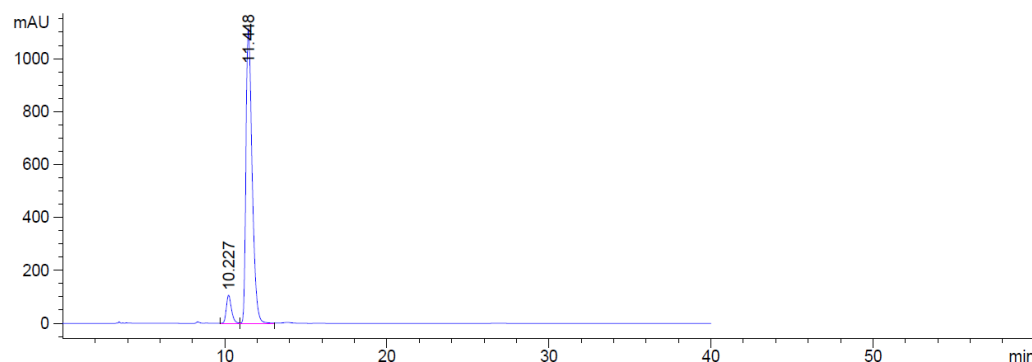

| # | Time   | Area    | Height | Width  | Area%  |
|---|--------|---------|--------|--------|--------|
| 1 | 10.227 | 2339.1  | 106.8  | 0.3335 | 7.338  |
| 2 | 11.448 | 29543.4 | 1114.6 | 0.4808 | 92.662 |

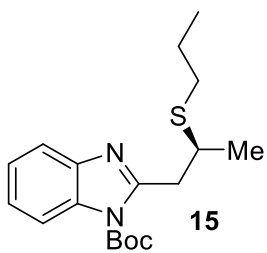

**Racemic product**

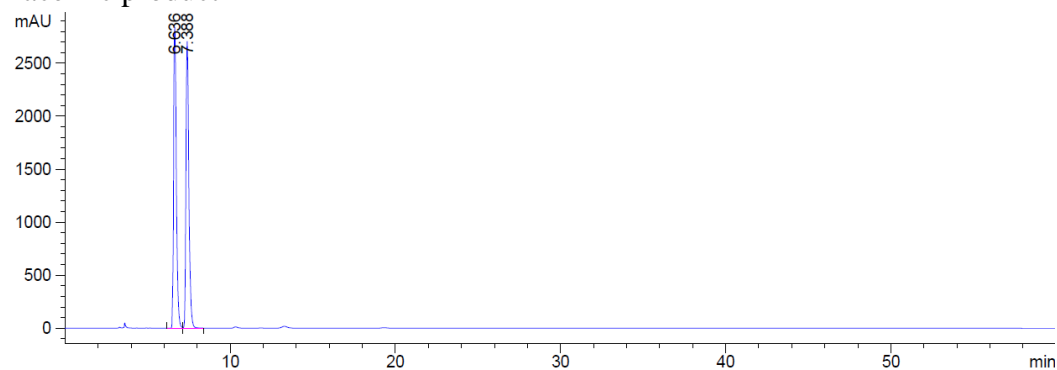

| # | Time  | Area    | Height | Width  | Area%  |
|---|-------|---------|--------|--------|--------|
| 1 | 6.636 | 32821.6 | 2836.5 | 0.1790 | 49.600 |
| 2 | 7.388 | 33350.9 | 2705.3 | 0.1898 | 50.400 |

**Enantioenriched Product**

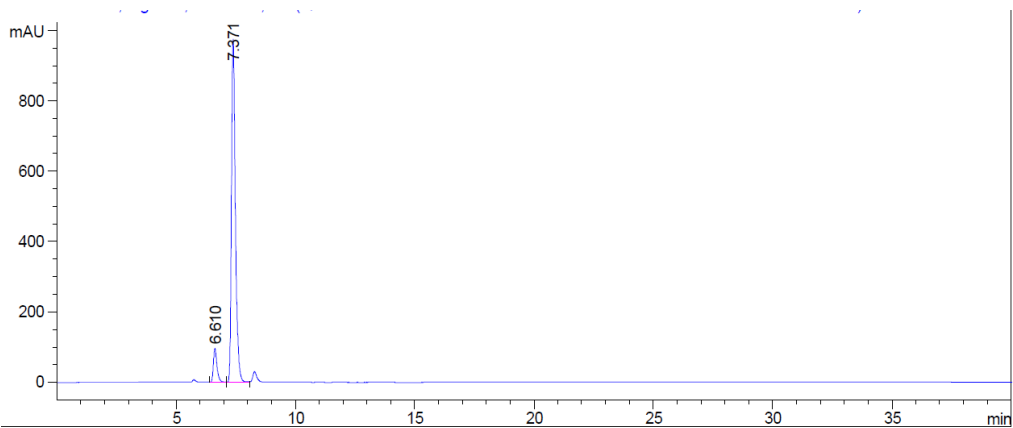

| # | Time  | Area    | Height | Width  | Area%  |
|---|-------|---------|--------|--------|--------|
| 1 | 6.610 | 1767.4  | 168.3  | 0.1585 | 8.295  |
| 2 | 7.371 | 19538.6 | 1699.8 | 0.1741 | 91.705 |

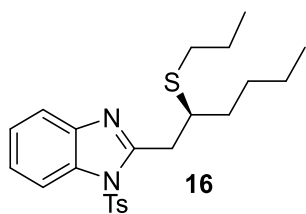

Racemic product

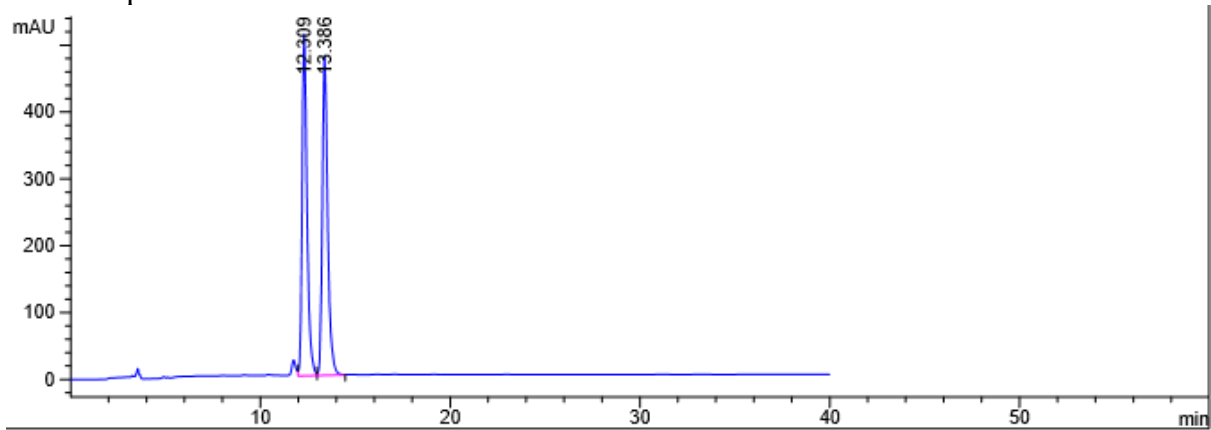

| # | Time   | Area       | Height    | Width  | Area%   |
|---|--------|------------|-----------|--------|---------|
| 1 | 12.309 | 8994.98633 | 510.45645 | 0.2656 | 49.3848 |
| 2 | 13.386 | 9219.11035 | 478.34451 | 0.2909 | 50.6152 |

Enantioenriched product

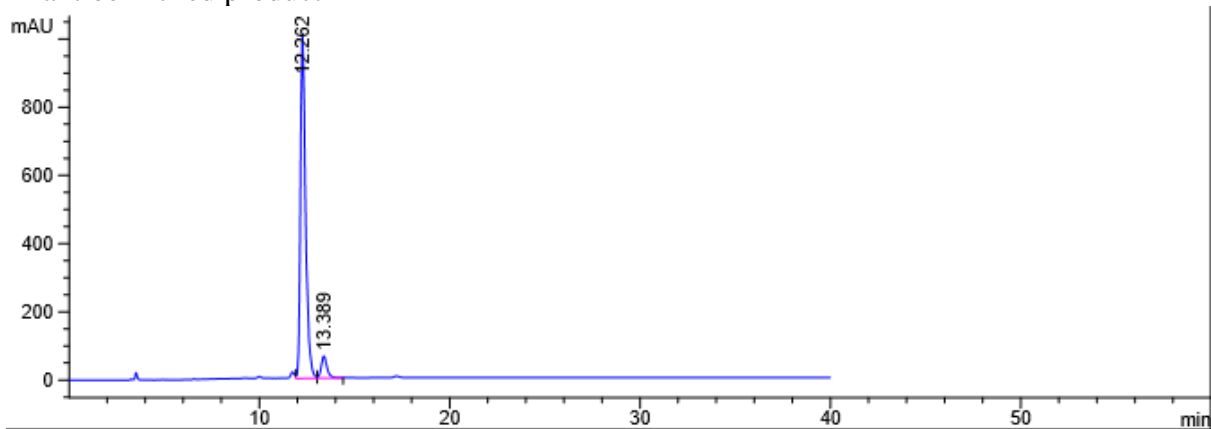

| # | Time   | Area       | Height     | Width  | Area%   |
|---|--------|------------|------------|--------|---------|
| 1 | 12.262 | 1.87781e4  | 1011.44312 | 0.2786 | 93.1804 |
| 2 | 13.389 | 1374.31885 | 64.74799   | 0.3156 | 6.8196  |

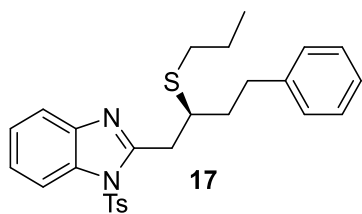

**Racemic Product**

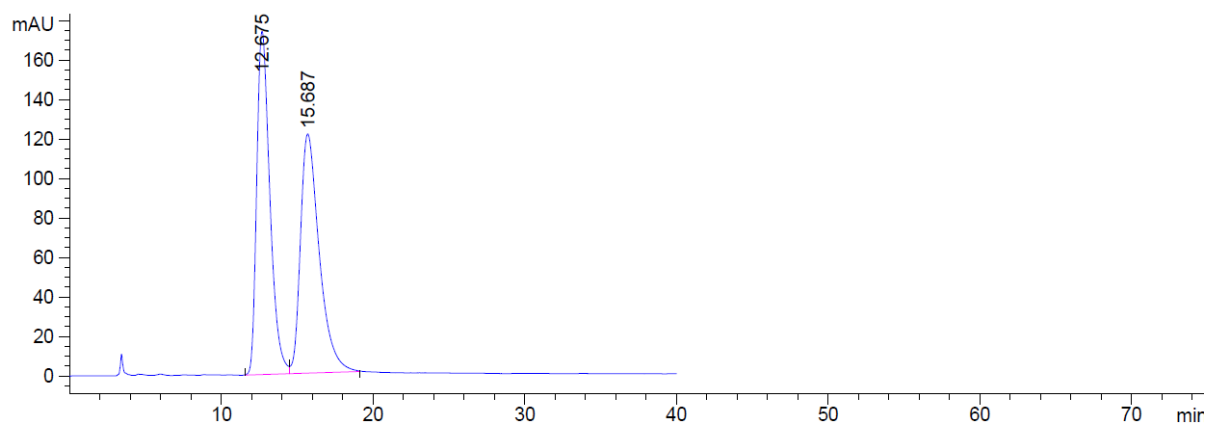

| # | Time   | Area    | Height   | Width  | Area%  |
|---|--------|---------|----------|--------|--------|
| 1 | 12.675 | 10457.9 | 173.8140 | 0.9179 | 50.063 |
| 2 | 15.687 | 10431.5 | 121.1182 | 1.3028 | 49.937 |

**Enantioenriched product**

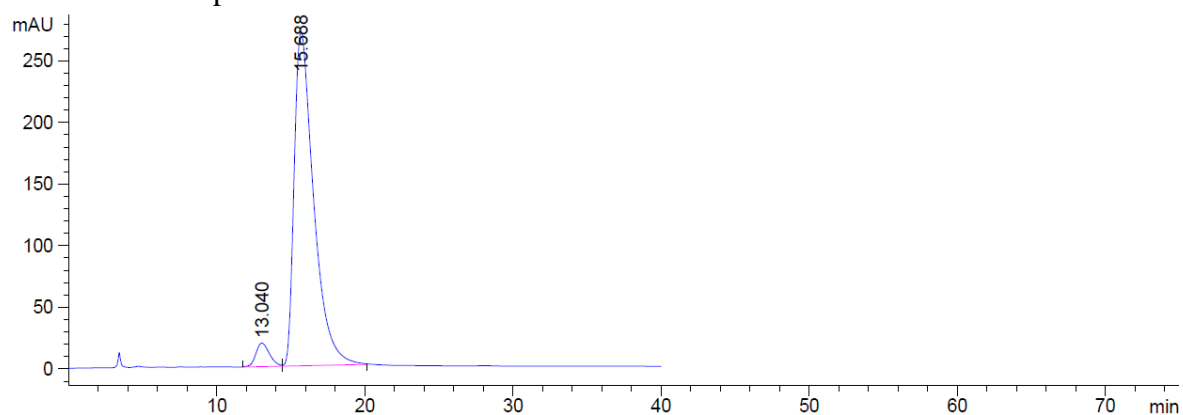

| # | Time   | Area    | Height   | Width  | Area%  |
|---|--------|---------|----------|--------|--------|
| 1 | 13.040 | 1212.1  | 19.0291  | 0.9811 | 4.666  |
| 2 | 15.688 | 24767.7 | 271.1863 | 1.3695 | 95.334 |

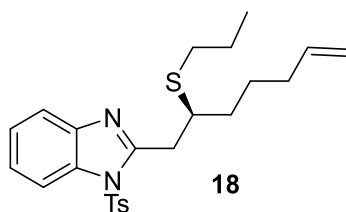

Racemic compound

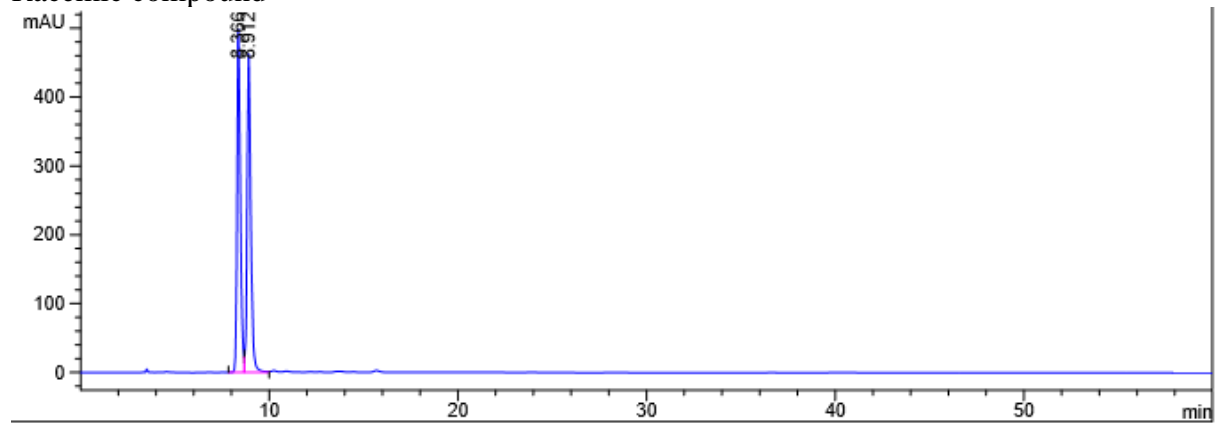

| # | Time  | Area       | Height    | Width  | Area%   |
|---|-------|------------|-----------|--------|---------|
| 1 | 8.366 | 6081.06592 | 499.22632 | 0.1821 | 48.9965 |
| 2 | 8.912 | 6330.15381 | 463.47977 | 0.2033 | 51.0035 |

Enantioenriched compound

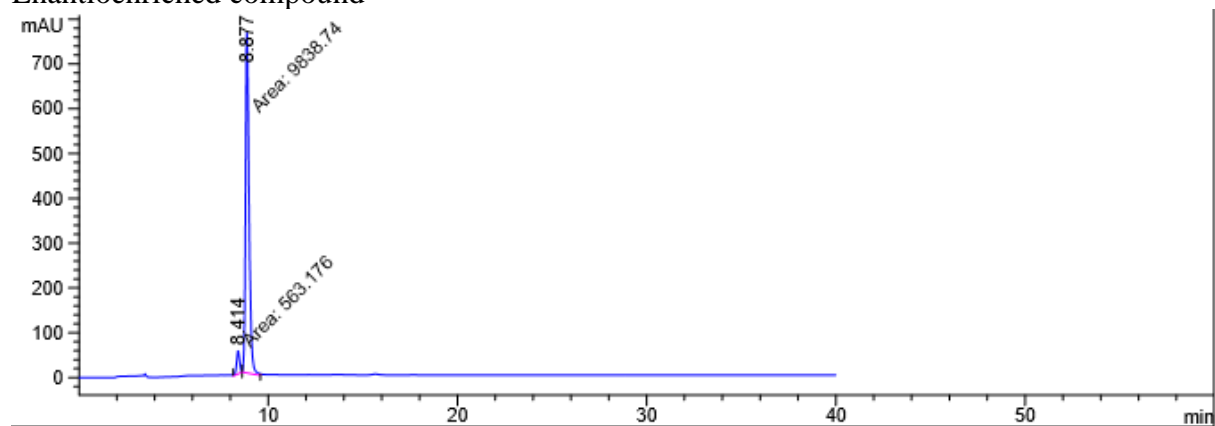

| # | Time  | Area       | Height    | Width  | Area%   |
|---|-------|------------|-----------|--------|---------|
| 1 | 8.414 | 563.17572  | 51.41105  | 0.1826 | 5.4142  |
| 2 | 8.877 | 9838.74414 | 760.34290 | 0.2157 | 94.5858 |



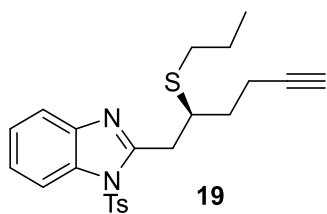

Racemic compound

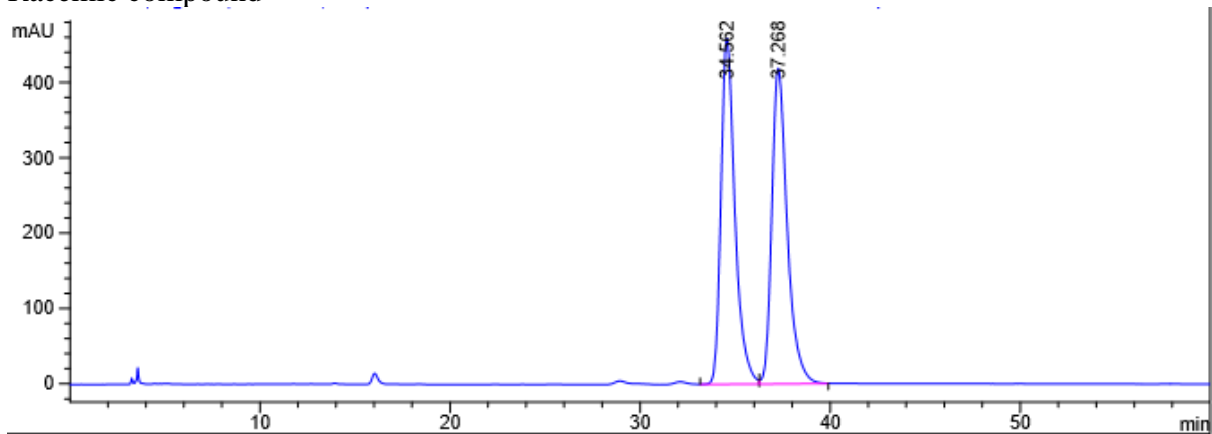

| # | Time   | Area      | Height    | Width  | Area%   |
|---|--------|-----------|-----------|--------|---------|
| 1 | 34.562 | 2.34292e4 | 459.58228 | 0.7708 | 49.8764 |
| 2 | 37.268 | 2.35453e4 | 418.68997 | 0.8561 | 50.1236 |

Enantioenriched product

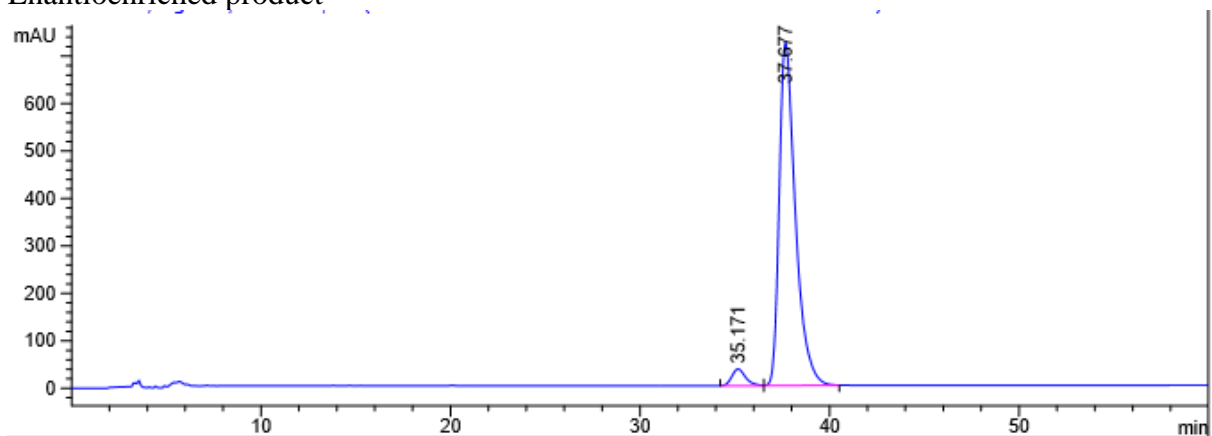

| # | Time   | Area       | Height    | Width  | Area%   |
|---|--------|------------|-----------|--------|---------|
| 1 | 35.171 | 1776.26453 | 35.18375  | 0.7650 | 3.9900  |
| 2 | 37.677 | 4.27417e4  | 722.38684 | 0.8943 | 96.0100 |

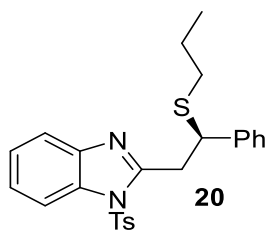

Racemic product

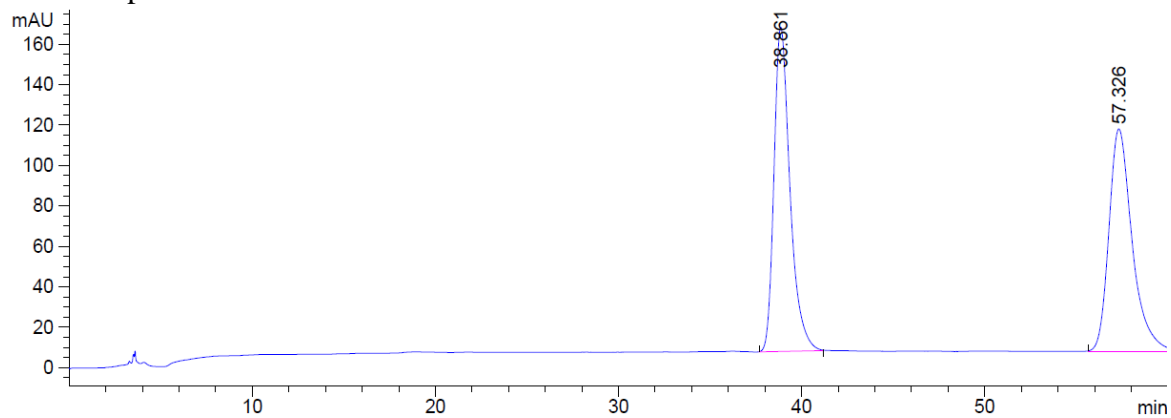

| # | Time   | Area   | Height   | Width  | Area%  |
|---|--------|--------|----------|--------|--------|
| 1 | 38.861 | 9754.6 | 160.4723 | 0.9252 | 50.252 |
| 2 | 57.326 | 9656.7 | 110.0178 | 1.3280 | 49.748 |

Enantioenriched product

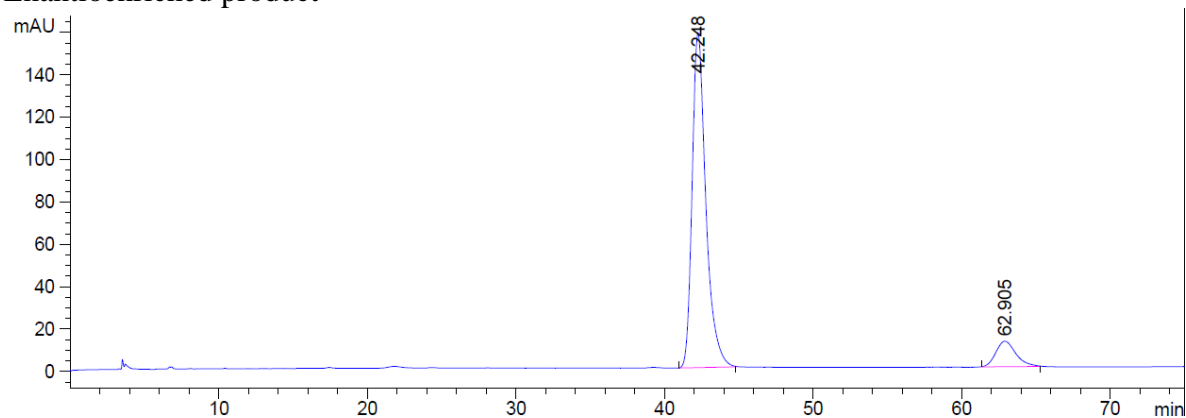

| # | Time   | Area    | Height   | Width  | Area%  |
|---|--------|---------|----------|--------|--------|
| 1 | 42.248 | 10133.4 | 158.0832 | 0.9679 | 89.967 |
| 2 | 62.905 | 1130.0  | 12.0323  | 1.3577 | 10.032 |

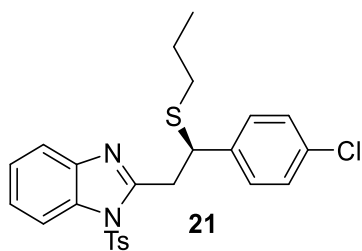

Racemic product

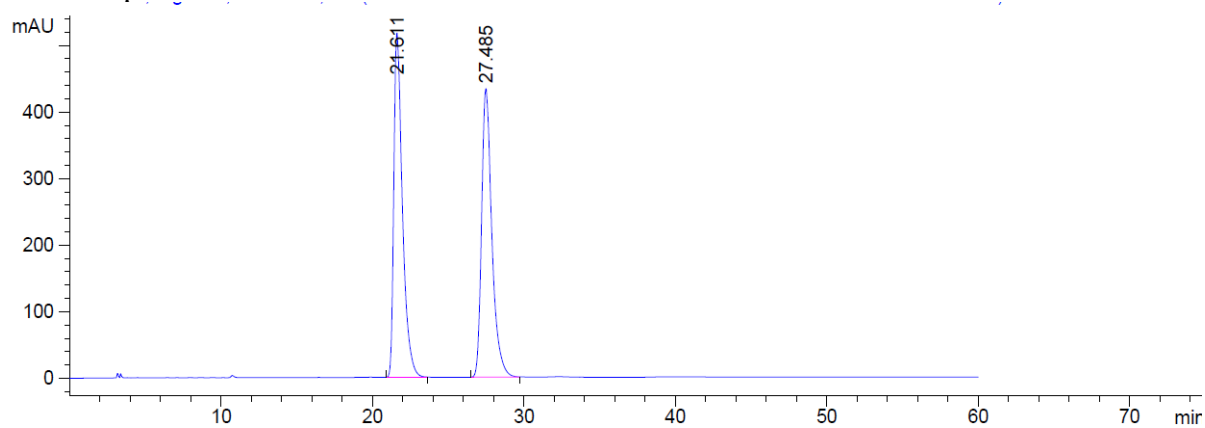

| # | Time   | Area    | Height   | Width  | Area%  |
|---|--------|---------|----------|--------|--------|
| 1 | 21.611 | 20460.5 | 517.2202 | 0.5955 | 50.037 |
| 2 | 27.485 | 20429.9 | 433.5056 | 0.7118 | 49.963 |

Enantioenriched product

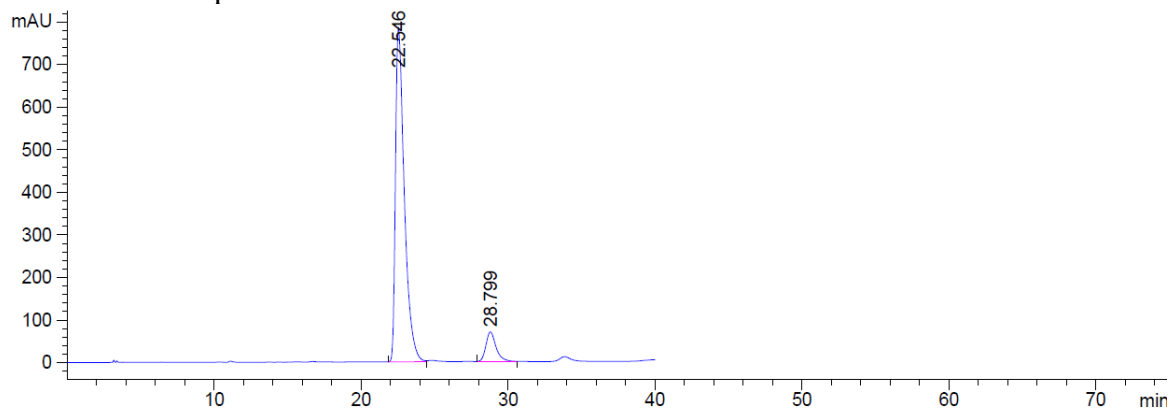

| # | Time   | Area    | Height   | Width  | Area%  |
|---|--------|---------|----------|--------|--------|
| 1 | 22.546 | 32986.8 | 785.3682 | 0.6300 | 90.856 |
| 2 | 28.799 | 3319.2  | 69.5783  | 0.7225 | 9.142  |

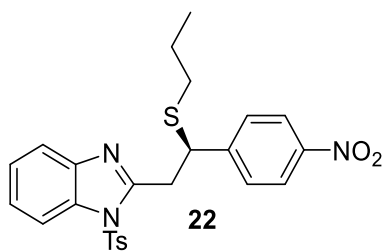

Racemic product

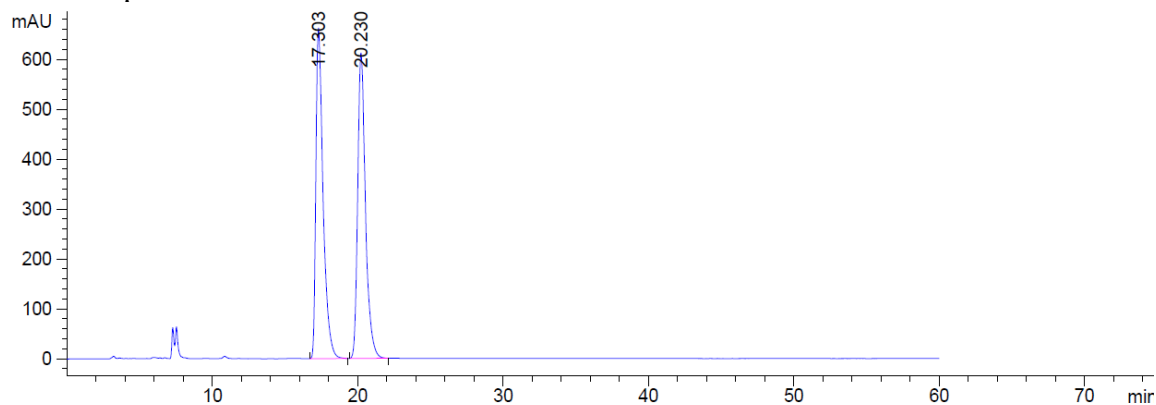

| # | Time   | Area    | Height   | Width  | Area%  |
|---|--------|---------|----------|--------|--------|
| 1 | 17.303 | 22852.9 | 662.3140 | 0.5166 | 50.125 |
| 2 | 20.230 | 22738.7 | 612.1039 | 0.5574 | 49.875 |

Enantioenriched product

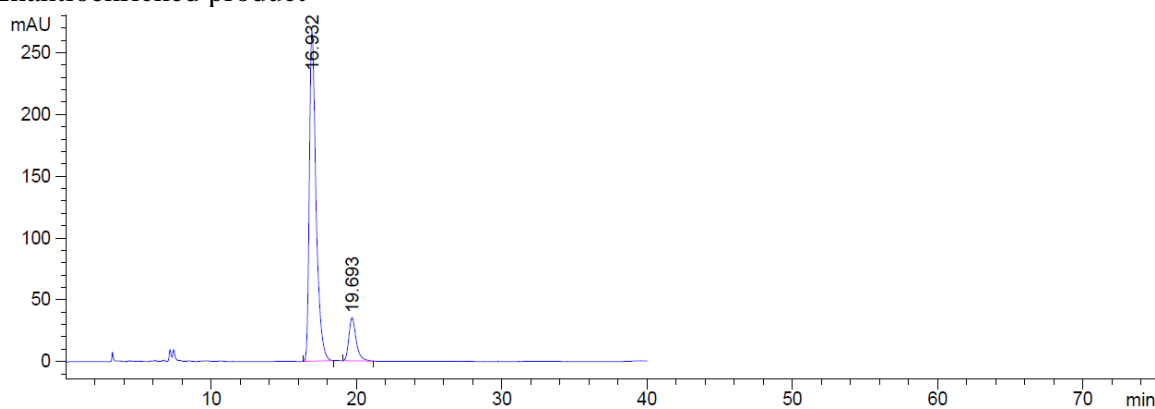

| # | Time   | Area   | Height   | Width  | Area%  |
|---|--------|--------|----------|--------|--------|
| 1 | 16.932 | 8521.5 | 267.1431 | 0.4821 | 87.486 |
| 2 | 19.693 | 1218.9 | 34.8653  | 0.5299 | 12.514 |

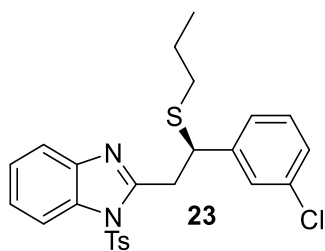

Racemic product

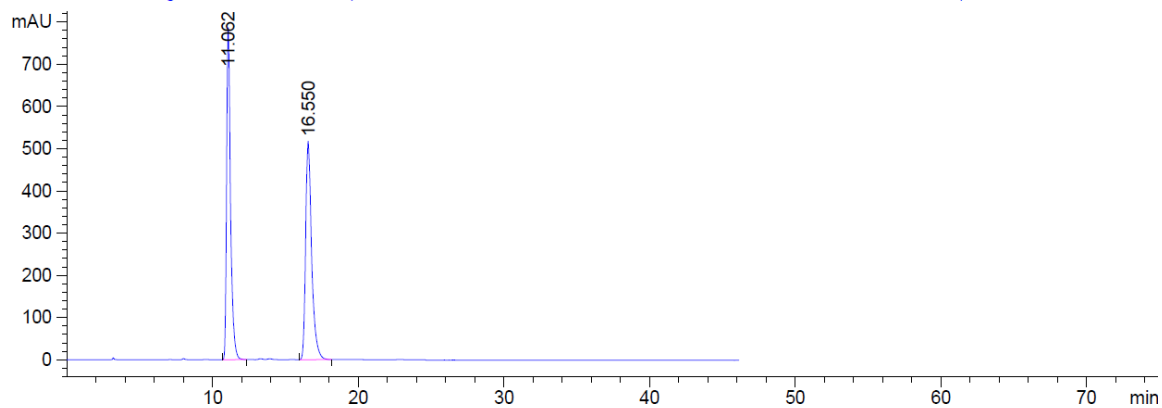

| # | Time   | Area    | Height   | Width  | Area%  |
|---|--------|---------|----------|--------|--------|
| 1 | 11.062 | 14813.3 | 786.5033 | 0.2837 | 49.895 |
| 2 | 16.550 | 14875.8 | 517.1082 | 0.4356 | 50.105 |

Enantioenriched product

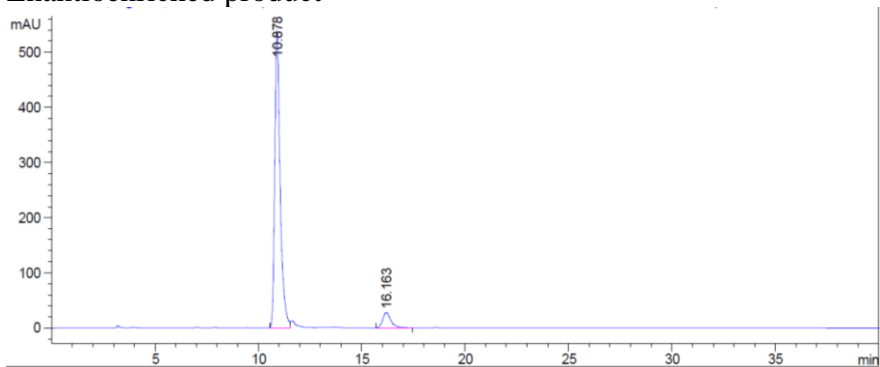

| # | Time   | Area   | Height | Width  | Area%   |
|---|--------|--------|--------|--------|---------|
| 1 | 10.878 | 9806.3 | 537.7  | 0.2768 | 92.8014 |
| 2 | 16.163 | 760.7  | 27.9   | 0.4142 | 7.1986  |

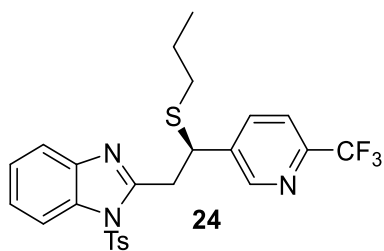

**Racemic product**

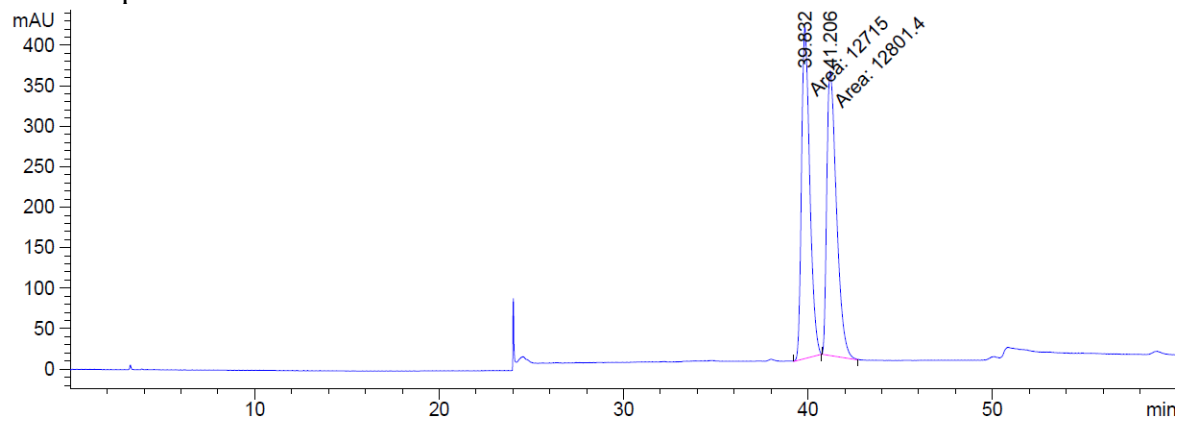

| # | Time   | Area    | Height   | Width  | Area%  |
|---|--------|---------|----------|--------|--------|
| 1 | 39.832 | 12715.0 | 408.8265 | 0.5184 | 49.831 |
| 2 | 41.206 | 12801.4 | 351.6669 | 0.6067 | 50.169 |

**Enantioenriched product**

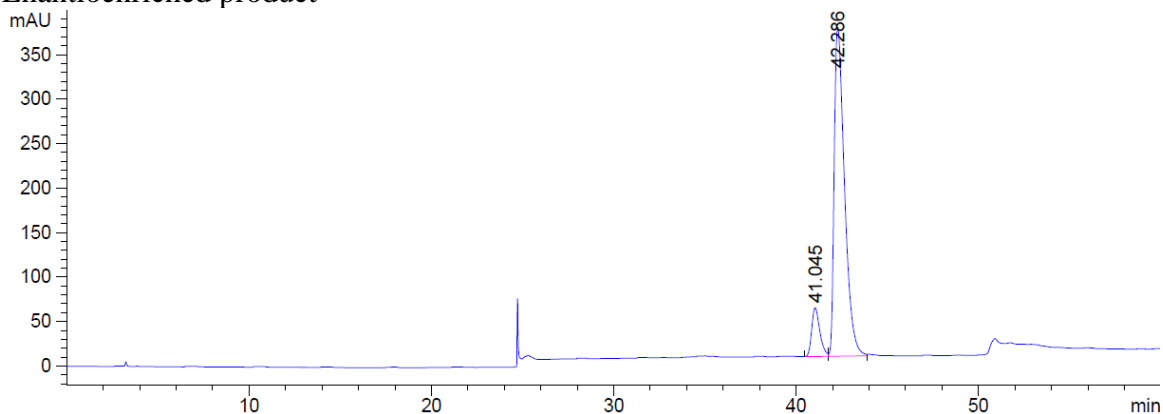

| # | Time   | Area    | Height   | Width  | Area%  |
|---|--------|---------|----------|--------|--------|
| 1 | 41.045 | 1692.3  | 54.7341  | 0.4767 | 10.432 |
| 2 | 42.286 | 14529.7 | 369.5265 | 0.5987 | 89.568 |

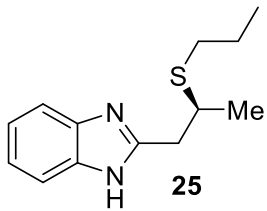

**Racemic compound**

DAD1 C, Sig=220,8 Ref=360,100 (Q:\HPLC\G6\DATA\MICHELE\MICHELE 2018-02-05 15-22-41\032-0401.D)

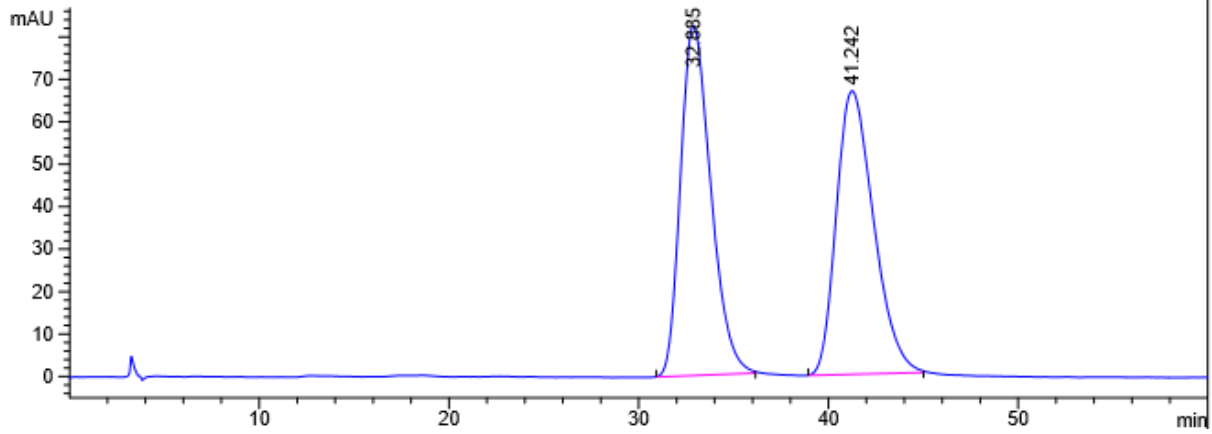

| # | Time   | Area       | Height   | Width  | Area%   |
|---|--------|------------|----------|--------|---------|
| 1 | 32.885 | 9137.54688 | 82.40344 | 1.6617 | 50.0216 |
| 2 | 41.242 | 9129.66797 | 66.75183 | 2.0777 | 49.9784 |

**Enantioenriched compound**

DAD1 C, Sig=220,8 Ref=360,100 (Q:\HPLC\G6\DATA\MICHELE\MICHELE 2018-02-05 15-22-41\031-0301.D)

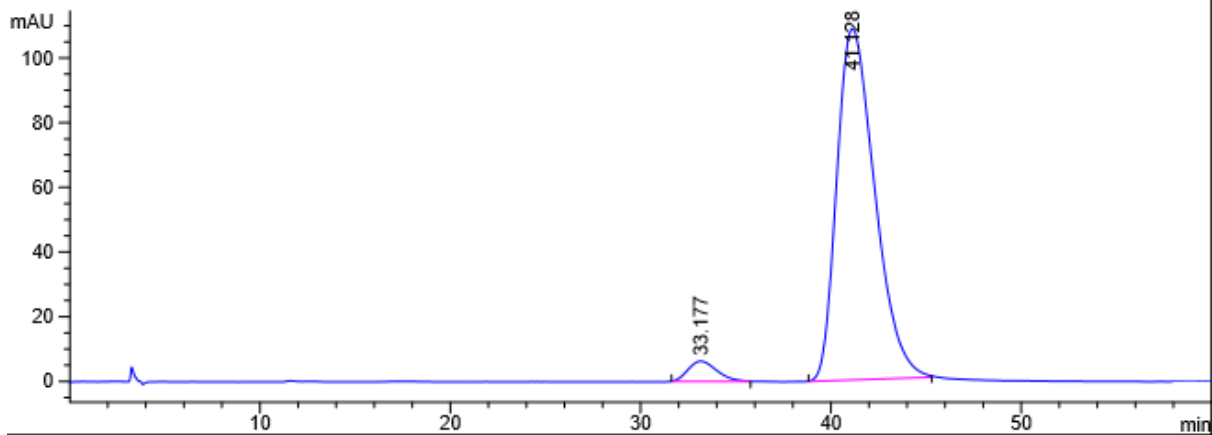

| # | Time   | Area      | Height    | Width  | Area%   |
|---|--------|-----------|-----------|--------|---------|
| 1 | 33.177 | 668.35852 | 6.28705   | 1.2762 | 4.2485  |
| 2 | 41.128 | 1.50633e4 | 108.59649 | 2.0903 | 95.7515 |

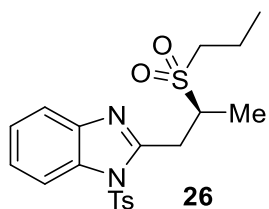

Racemic compound

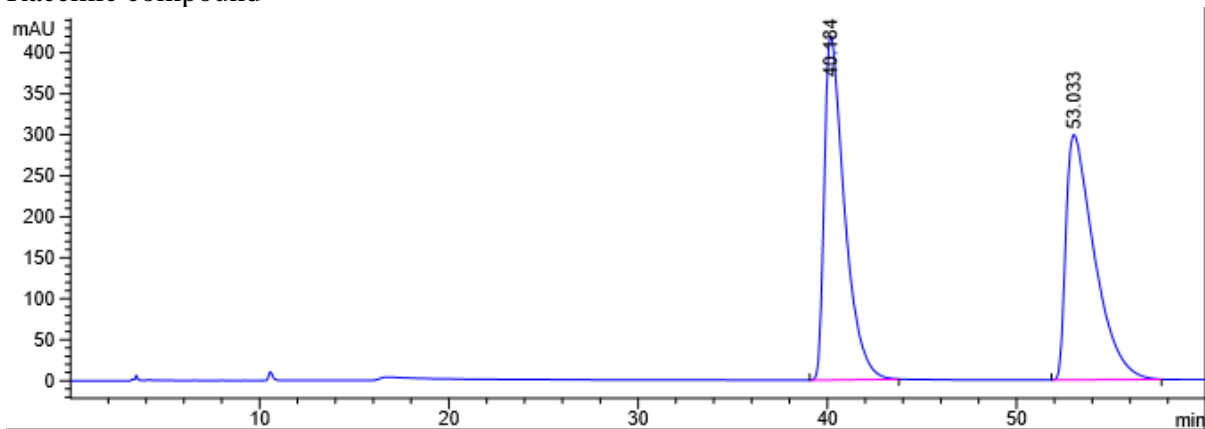

| # | Time   | Area      | Height    | Width  | Area%   |
|---|--------|-----------|-----------|--------|---------|
| 1 | 40.184 | 3.11824e4 | 419.67453 | 1.1108 | 49.9185 |
| 2 | 53.033 | 3.12842e4 | 299.08618 | 1.5523 | 50.0815 |

Enantioenriched compound

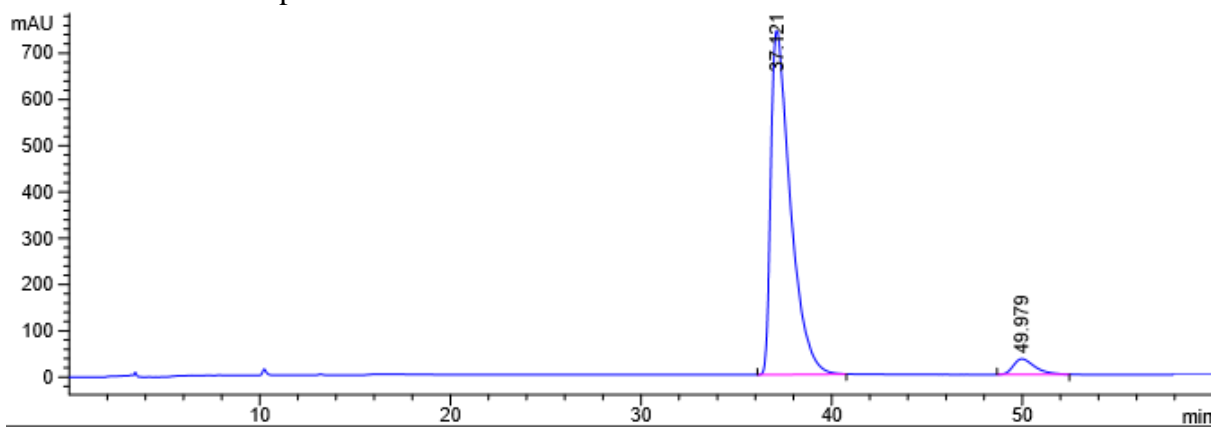

| # | Time   | Area       | Height    | Width  | Area%   |
|---|--------|------------|-----------|--------|---------|
| 1 | 37.121 | 5.29723e4  | 743.85822 | 1.0648 | 95.1836 |
| 2 | 49.979 | 2680.45581 | 33.77411  | 1.1779 | 4.8164  |



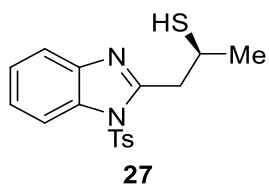

Racemic compound

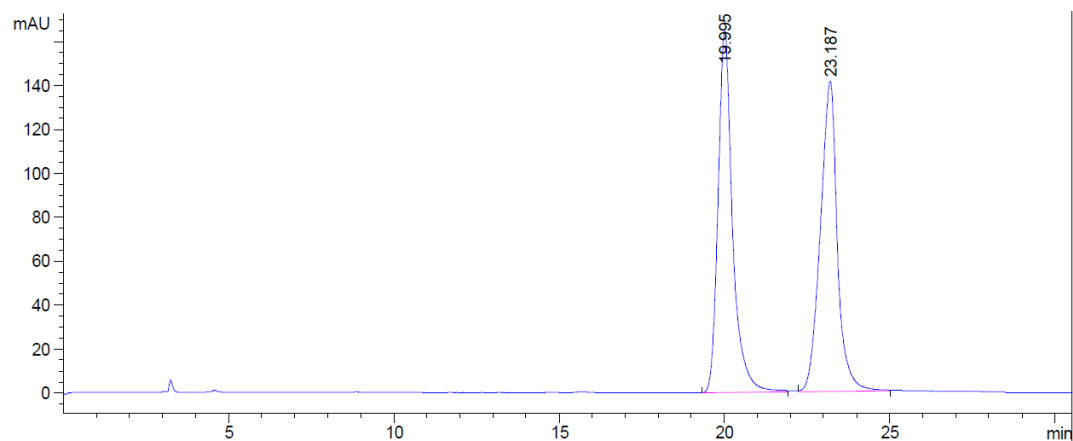

| # | Time   | Area   | Height | Width  | Area%   |
|---|--------|--------|--------|--------|---------|
| 1 | 19.995 | 5018.7 | 164.5  | 0.4560 | 49.8617 |
| 2 | 23.187 | 5046.6 | 141.3  | 0.5328 | 50.1383 |

Enantioenriched compound

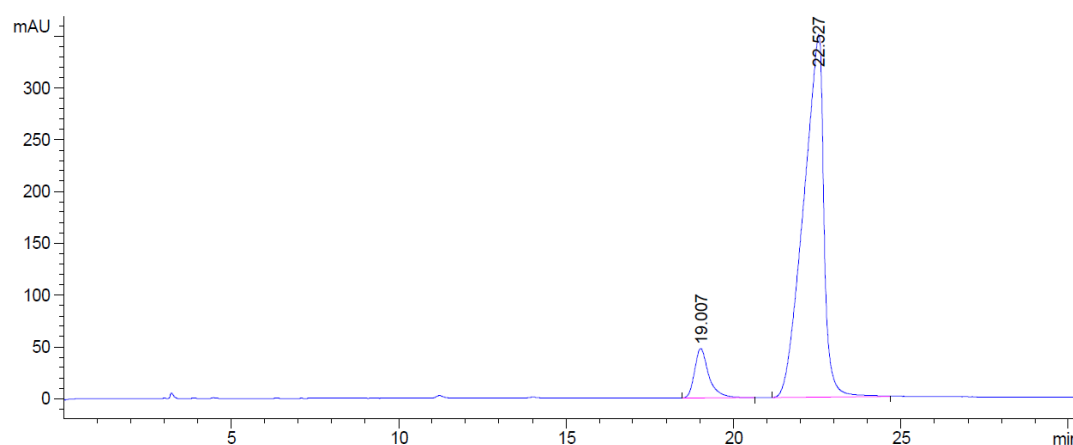

| # | Time   | Area    | Height | Width  | Area%  |
|---|--------|---------|--------|--------|--------|
| 1 | 19.007 | 1415.6  | 47.77  | 0.4417 | 8.755  |
| 2 | 22.527 | 14753.6 | 350.1  | 0.6157 | 91.245 |

### 13/ Single Crystal X-Ray Diffraction Data

X-Ray structure data for compound 25

CCDC:1833189

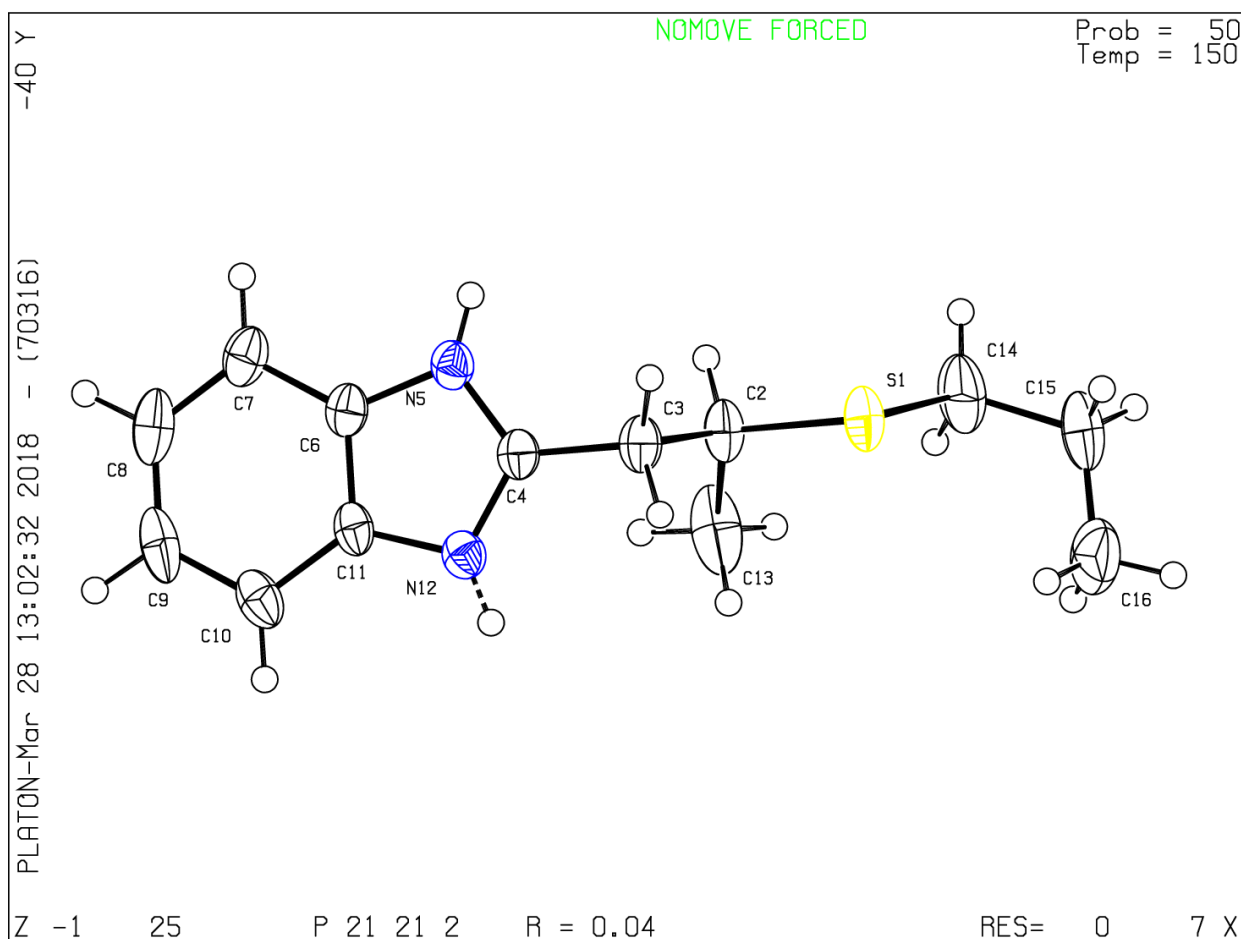

Table 1

Experimental details

| Crystal data                |                                                                 |
|-----------------------------|-----------------------------------------------------------------|
| Chemical formula            | $C_{13}H_{18}N_2S$                                              |
| $M_r$                       | 234.37                                                          |
| Crystal system, space group | Orthorhombic, $P2_12_12$                                        |
| Temperature (K)             | 150                                                             |
| $a, b, c$ (Å)               | 20.7206 (4), 9.8606 (2), 6.3486 (1)                             |
| $V$ (Å <sup>3</sup> )       | 1297.13 (4)                                                     |
| $Z$                         | 4                                                               |
| Radiation type              | Cu $K\alpha$                                                    |
| $\mu$ (mm <sup>-1</sup> )   | 2.00                                                            |
| Crystal size (mm)           | 0.20 × 0.20 × 0.15                                              |
| Data collection             |                                                                 |
| Diffractometer              | Unknown                                                         |
| Absorption correction       | Multi-scan<br><i>DENZO/SCALEPACK</i> (Otwinowski & Minor, 1997) |
| $T_{min}, T_{max}$          | 0.42, 0.74                                                      |

|                                                                               |                                                                        |
|-------------------------------------------------------------------------------|------------------------------------------------------------------------|
| No. of measured, independent and observed [ $I > 2.0\sigma(I)$ ] reflections  | 26964, 2686, 2630                                                      |
| $R_{\text{int}}$                                                              | 0.047                                                                  |
| $(\sin \theta/\lambda)_{\text{max}}$ ( $\text{\AA}^{-1}$ )                    | 0.630                                                                  |
| <b>Refinement</b>                                                             |                                                                        |
| $R[F^2 > 2\sigma(F^2)]$ , $wR(F^2)$ , $S$                                     | 0.037, 0.108, 0.99                                                     |
| No. of reflections                                                            | 2686                                                                   |
| No. of parameters                                                             | 155                                                                    |
| No. of restraints                                                             | 8                                                                      |
| H-atom treatment                                                              | H atoms treated by a mixture of independent and constrained refinement |
| $\Delta\rho_{\text{max}}$ , $\Delta\rho_{\text{min}}$ ( $\text{e \AA}^{-3}$ ) | 0.33, -0.34                                                            |
| Absolute structure                                                            | Flack (1983), 1104 Friedel-pairs                                       |
| Absolute structure parameter                                                  | 0.01 (2)                                                               |

Computer programs: USER DEFINED DATA COLLECTION, USER DEFINED CELL REFINEMENT, USER DEFINED DATA

REDUCTION, *SIR92* (Altomare *et al.*, 1994), *CRYSTALS*(Betteridge *et al.*, 2003), *CAMERON* (Watkin *et al.*, 1996).

Table 2

Selected geometric parameters ( $\text{\AA}$ ,  $^\circ$ )

|           |             |             |             |
|-----------|-------------|-------------|-------------|
| S1—C2     | 1.8212 (16) | C6—C11      | 1.394 (2)   |
| S1—C14    | 1.821 (2)   | C7—C8       | 1.377 (3)   |
| C2—C3     | 1.538 (2)   | C8—C9       | 1.388 (3)   |
| C2—C13    | 1.511 (3)   | C9—C10      | 1.383 (3)   |
| C3—C4     | 1.490 (2)   | C10—C11     | 1.398 (3)   |
| C4—N5     | 1.332 (2)   | C11—N12     | 1.389 (3)   |
| C4—N12    | 1.338 (2)   | C14—C15     | 1.527 (3)   |
| N5—C6     | 1.390 (3)   | C15—C16     | 1.491 (4)   |
| C6—C7     | 1.398 (3)   |             |             |
| C2—S1—C14 | 104.02 (9)  | C7—C6—C11   | 121.5 (2)   |
| S1—C2—C3  | 104.10 (10) | C6—C7—C8    | 116.6 (2)   |
| S1—C2—C13 | 113.04 (15) | C7—C8—C9    | 122.2 (3)   |
| C3—C2—C13 | 112.10 (18) | C8—C9—C10   | 121.7 (3)   |
| C2—C3—C4  | 113.54 (13) | C9—C10—C11  | 116.8 (2)   |
| C3—C4—N5  | 123.70 (19) | C10—C11—C6  | 121.2 (2)   |
| C3—C4—N12 | 123.28 (18) | C10—C11—N12 | 131.34 (19) |
| N5—C4—N12 | 113.02 (13) | C6—C11—N12  | 107.46 (18) |
| C4—N5—C6  | 106.14 (15) | C11—N12—C4  | 105.98 (15) |
| N5—C6—C7  | 131.08 (18) | S1—C14—C15  | 109.75 (16) |
| N5—C6—C11 | 107.40 (18) | C14—C15—C16 | 114.3 (2)   |

**Table 3****Hydrogen-bond geometry (Å, °)**

| <i>D</i> —H··· <i>A</i>      | <i>D</i> —H | H··· <i>A</i> | <i>D</i> ··· <i>A</i> | <i>D</i> —H··· <i>A</i> |
|------------------------------|-------------|---------------|-----------------------|-------------------------|
| N5—H51···N5 <sup>i</sup>     | 0.85        | 1.98          | 2.792 (3)             | 161 (2)                 |
| N12—H121···N12 <sup>ii</sup> | 0.86        | 1.98          | 2.801 (3)             | 162 (5)                 |

Symmetry codes: (i)  $-x+1, -y+1, z$ ; (ii)  $-x+1, -y, z$ .**Alert level C**

PLAT250\_ALERT\_2\_C Large U3/U1 Ratio for Average U(i,j) Tensor .... 2.6 Note

**This alert is due to disorder in the structure.**

## 14/ Computational Methods

The range-separated dispersion-corrected  $\omega$ B97X-D density functional<sup>i,ii</sup> was used with the 6-31G(d) basis set to optimize geometries. Vibrational frequency calculations were carried out to confirm that stationary points were either minima or first-order saddle points on the potential energy surface, and to obtain thermal corrections to Gibbs free energies at 298.15 K (80 °C). Quasi-harmonic (QHA) corrections were applied to the computed vibrational entropies using a frequency cut-off value of 100.0  $\text{cm}^{-1}$ , adopting the model proposed by Grimme.<sup>iii</sup> This was automated by the *GoodVibes* program.<sup>iv</sup>

Vibrational frequency calculations were carried out to confirm that stationary points were either minima or first-order saddle points on the potential energy surface, and to obtain thermal corrections to Gibbs free energies at 353.15 K (80 °C). Quasi-harmonic (QHA) corrections were applied to the computed vibrational entropies using a frequency cut-off value of 100.0  $\text{cm}^{-1}$ , adopting the model proposed by Grimme.<sup>v</sup> This was automated by the *GoodVibes* program.<sup>vi</sup> Solvent effects were considered using the integral equation formalism variant of the polarizable continuum model (IEF-PCM)<sup>vii,viii,ix,x,xi</sup> with the SMD solvation model (solvent=ethanol).<sup>xii</sup> Density functional theory (DFT) calculations were carried out in *Gaussian 09*.<sup>xiii</sup>

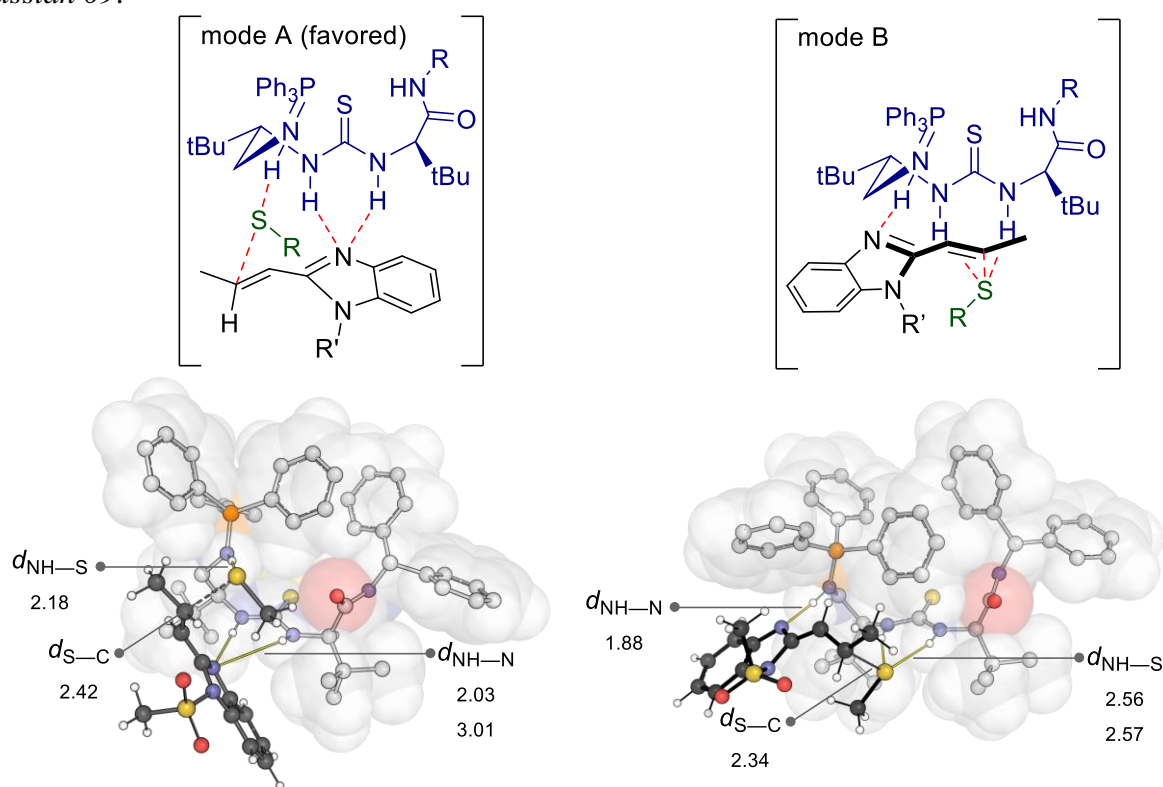

**Figure S1.** Comparison of 'mode A' and 'mode B' transition structures leading the major enantiomeric product. Mode A is favored by several kcal/mol using either  $\omega$ B97XD or M06-2X functionals.

### Cartesian Coordinates (xyz format):

136

mode A TS (E = -4263.576613 H)

C -1.126728 -2.730766 0.944321

N -0.007387 -1.837566 1.158652

H 0.780734 -1.945485 0.532640

|   |           |           |           |
|---|-----------|-----------|-----------|
| C | -0.070408 | -0.683240 | 1.868412  |
| S | -1.499399 | -0.202053 | 2.666146  |
| N | 1.079709  | 0.015110  | 1.905089  |
| H | 1.931533  | -0.424272 | 1.534365  |
| C | 1.218856  | 1.383877  | 2.378892  |
| H | 0.209980  | 1.712905  | 2.639152  |
| H | 1.177054  | 1.803527  | -0.799539 |
| C | 1.723846  | 2.243898  | 1.210007  |
| N | 0.799005  | 2.236325  | 0.074436  |
| H | 2.670389  | 1.846266  | 0.837006  |
| P | -0.253350 | 3.458853  | -0.207747 |
| C | 0.566197  | 4.936354  | -0.852937 |
| C | 1.793344  | 4.765370  | -1.501702 |
| C | -0.010260 | 6.208858  | -0.765937 |
| C | 2.439858  | 5.863106  | -2.059835 |
| H | 2.236992  | 3.776224  | -1.580900 |
| C | 0.640958  | 7.301169  | -1.328736 |
| H | -0.960717 | 6.350653  | -0.259584 |
| C | 1.864760  | 7.128364  | -1.972947 |
| H | 3.391805  | 5.726403  | -2.563381 |
| H | 0.193429  | 8.287805  | -1.260857 |
| H | 2.369937  | 7.984361  | -2.410275 |
| C | -1.085940 | 3.897989  | 1.326436  |
| C | -0.542886 | 4.844802  | 2.203309  |
| C | -2.248565 | 3.204474  | 1.672516  |
| C | -1.171035 | 5.097335  | 3.417503  |
| H | 0.363799  | 5.382982  | 1.942934  |
| C | -2.871916 | 3.464548  | 2.887147  |
| H | -2.656575 | 2.457664  | 0.999758  |

|   |           |           |           |
|---|-----------|-----------|-----------|
| C | -2.334470 | 4.408630  | 3.757603  |
| H | -0.750503 | 5.829007  | 4.100124  |
| H | -3.770585 | 2.918908  | 3.157190  |
| H | -2.821574 | 4.606533  | 4.707664  |
| C | -1.425703 | 2.843536  | -1.421769 |
| C | -1.602746 | 1.465234  | -1.570412 |
| C | -2.159701 | 3.740274  | -2.206745 |
| C | -2.498445 | 0.987251  | -2.520124 |
| H | -1.044688 | 0.764517  | -0.959343 |
| C | -3.067875 | 3.252529  | -3.136929 |
| H | -2.016510 | 4.811812  | -2.105244 |
| C | -3.231175 | 1.877101  | -3.297981 |
| H | -3.639829 | 3.945498  | -3.746135 |
| H | -3.935674 | 1.499662  | -4.032617 |
| H | 1.922933  | 3.264448  | 1.553324  |
| H | -2.612067 | -0.084998 | -2.631836 |
| C | 4.395826  | 0.239232  | -0.612983 |
| C | 4.325084  | 0.738685  | -1.907251 |
| H | 4.458865  | 0.059279  | -2.738135 |
| S | 2.026512  | 0.972250  | -2.622057 |
| C | 1.560978  | -0.652622 | -1.953119 |
| H | 1.815967  | -0.698977 | -0.888969 |
| H | 0.486581  | -0.829269 | -2.050980 |
| H | 2.093273  | -1.460360 | -2.467630 |
| C | 4.778236  | 2.153659  | -2.158641 |
| H | 4.409060  | 2.533697  | -3.114849 |
| H | 4.446709  | 2.828039  | -1.361084 |
| H | 5.876559  | 2.188426  | -2.182412 |
| H | 4.345188  | 0.957356  | 0.202399  |

|   |           |           |           |
|---|-----------|-----------|-----------|
| H | -1.708524 | -2.736717 | 1.868994  |
| C | -0.645207 | -4.194452 | 0.694265  |
| C | 0.476026  | -4.259236 | -0.354288 |
| C | -0.146052 | -4.746991 | 2.035504  |
| C | -1.826719 | -5.050874 | 0.215769  |
| H | 0.198013  | -3.732388 | -1.273075 |
| H | 0.684573  | -5.304749 | -0.606805 |
| H | -0.976077 | -4.866669 | 2.742513  |
| H | 0.327575  | -5.725314 | 1.896572  |
| H | 0.591703  | -4.076988 | 2.485002  |
| H | -1.523902 | -6.103385 | 0.181216  |
| H | -2.686570 | -4.974515 | 0.891517  |
| H | -2.155795 | -4.769580 | -0.790459 |
| C | -2.030225 | -2.225356 | -0.189442 |
| O | -1.589101 | -1.880586 | -1.282658 |
| N | -3.352476 | -2.259913 | 0.093343  |
| H | -3.641653 | -2.507899 | 1.029211  |
| C | -4.389776 | -2.071081 | -0.906370 |
| H | -3.901233 | -2.238960 | -1.871588 |
| C | -5.446874 | -3.150045 | -0.708613 |
| C | -6.477604 | -2.984286 | 0.219011  |
| C | -5.351047 | -4.353335 | -1.409710 |
| C | -7.395995 | -4.006444 | 0.442503  |
| H | -6.569316 | -2.046105 | 0.760410  |
| C | -6.271714 | -5.374806 | -1.191384 |
| H | -4.551686 | -4.488962 | -2.134304 |
| C | -7.295275 | -5.203939 | -0.262058 |
| H | -8.193006 | -3.865888 | 1.167147  |
| H | -6.188633 | -6.304860 | -1.746340 |



|   |           |           |           |
|---|-----------|-----------|-----------|
| H | -8.015649 | -5.998775 | -0.091275 |
| C | -4.977000 | -0.665220 | -0.922820 |
| C | -5.878661 | -0.333037 | -1.938452 |
| C | -4.641984 | 0.296226  | 0.027629  |
| C | -6.433249 | 0.939126  | -2.007164 |
| H | -6.147024 | -1.079670 | -2.682257 |
| C | -5.207479 | 1.570440  | -0.035462 |
| H | -3.920529 | 0.056633  | 0.805241  |
| C | -6.098437 | 1.897632  | -1.051179 |
| H | -7.127575 | 1.184161  | -2.806005 |
| H | -4.944565 | 2.314032  | 0.711532  |
| H | -6.530581 | 2.892852  | -1.101349 |
| C | 2.096057  | 1.513612  | 3.660070  |
| C | 3.594654  | 1.363096  | 3.356574  |
| C | 1.837611  | 2.889860  | 4.294343  |
| C | 1.679639  | 0.433479  | 4.666794  |
| H | 3.809102  | 0.423986  | 2.833981  |
| H | 3.974986  | 2.189825  | 2.744248  |
| H | 4.165313  | 1.366288  | 4.293087  |
| H | 0.775907  | 3.021170  | 4.534224  |
| H | 2.408082  | 2.987637  | 5.225526  |
| H | 2.140717  | 3.716304  | 3.641202  |
| H | 2.208700  | 0.578700  | 5.616281  |
| H | 0.602655  | 0.468329  | 4.863615  |
| H | 1.920764  | -0.568717 | 4.298034  |
| C | 4.233128  | -3.356566 | 0.127027  |
| C | 3.703261  | -2.698960 | 1.247792  |
| C | 3.258073  | -3.427697 | 2.350191  |
| C | 3.347487  | -4.813619 | 2.297535  |

|   |          |           |           |
|---|----------|-----------|-----------|
| C | 3.850113 | -5.459670 | 1.162710  |
| C | 4.293232 | -4.743691 | 0.051867  |
| C | 4.209061 | -1.090308 | -0.135658 |
| H | 3.007400 | -5.404712 | 3.142822  |
| H | 3.895461 | -6.544344 | 1.138292  |
| H | 4.674714 | -5.251316 | -0.822662 |
| N | 4.569308 | -2.314195 | -0.770331 |
| N | 3.682330 | -1.333614 | 1.056641  |
| S | 5.648001 | -2.518305 | -2.075242 |
| O | 6.023202 | -3.921130 | -2.080375 |
| O | 5.049549 | -1.947742 | -3.268510 |
| C | 7.057307 | -1.554038 | -1.585122 |
| H | 6.748886 | -0.521778 | -1.411348 |
| H | 7.472529 | -1.994086 | -0.676680 |
| H | 7.778550 | -1.610164 | -2.404295 |
| H | 1.415401 | -3.838910 | 0.021475  |
| H | 2.850392 | -2.914305 | 3.215950  |

136

mode B TS (E = -4263.566726 H)

|   |           |           |          |
|---|-----------|-----------|----------|
| C | -3.258044 | -2.556884 | 0.620128 |
| N | -1.905416 | -2.054680 | 0.788823 |
| H | -1.167320 | -2.502433 | 0.246811 |
| C | -1.519072 | -1.189025 | 1.752088 |
| S | -2.627440 | -0.394029 | 2.784845 |
| N | -0.187257 | -0.987874 | 1.820879 |
| H | 0.385115  | -1.518193 | 1.158066 |
| C | 0.510860  | -0.416874 | 2.959182 |
| H | -0.256140 | -0.242268 | 3.717885 |
| H | 2.496952  | 0.746996  | 0.989758 |

|   |           |          |           |
|---|-----------|----------|-----------|
| C | 1.100210  | 0.976633 | 2.626850  |
| N | 1.590894  | 1.177917 | 1.263098  |
| H | 1.913606  | 1.208443 | 3.321413  |
| P | 0.994389  | 2.281923 | 0.204486  |
| C | 2.392185  | 2.824495 | -0.798397 |
| C | 3.611117  | 3.111229 | -0.172446 |
| C | 2.277383  | 2.928932 | -2.187341 |
| C | 4.705717  | 3.501048 | -0.933179 |
| H | 3.712324  | 3.006244 | 0.902815  |
| C | 3.378989  | 3.316676 | -2.943895 |
| H | 1.341398  | 2.693302 | -2.683475 |
| C | 4.590444  | 3.599062 | -2.318728 |
| H | 5.652373  | 3.709005 | -0.444722 |
| H | 3.289192  | 3.389897 | -4.023032 |
| H | 5.450470  | 3.893517 | -2.913151 |
| C | 0.264526  | 3.677259 | 1.093564  |
| C | 0.964487  | 4.876099 | 1.255619  |
| C | -1.005286 | 3.524898 | 1.667554  |
| C | 0.398510  | 5.913487 | 1.990752  |
| H | 1.941947  | 5.010432 | 0.803138  |
| C | -1.555380 | 4.559770 | 2.414322  |
| H | -1.560994 | 2.599343 | 1.539522  |
| C | -0.855959 | 5.754292 | 2.573149  |
| H | 0.939178  | 6.847463 | 2.107297  |
| H | -2.531241 | 4.430966 | 2.872287  |
| H | -1.292127 | 6.564214 | 3.150026  |
| C | -0.288611 | 1.660785 | -0.895492 |
| C | -0.351437 | 0.294612 | -1.173505 |
| C | -1.176673 | 2.547887 | -1.517708 |

|   |           |           |           |
|---|-----------|-----------|-----------|
| C | -1.319368 | -0.188756 | -2.046373 |
| H | 0.348070  | -0.393880 | -0.711889 |
| C | -2.126630 | 2.059002  | -2.405822 |
| H | -1.136867 | 3.612301  | -1.305040 |
| C | -2.208323 | 0.691141  | -2.656293 |
| H | -2.829087 | 2.742965  | -2.871242 |
| H | -2.974496 | 0.304134  | -3.320210 |
| H | 0.318479  | 1.712962  | 2.817476  |
| H | -1.397536 | -1.254071 | -2.230346 |
| C | 3.055385  | -0.783821 | -1.635767 |
| C | 2.569397  | -1.959322 | -2.220435 |
| H | 3.236563  | -2.813955 | -2.232643 |
| C | 4.129095  | -0.680388 | -0.725777 |
| S | 1.144345  | -3.070182 | -0.734006 |
| C | 2.498169  | -3.917796 | 0.137868  |
| H | 3.359015  | -3.249686 | 0.258890  |
| H | 2.181225  | -4.241696 | 1.133965  |
| H | 2.827304  | -4.801183 | -0.419121 |
| C | 1.677086  | -1.853733 | -3.429812 |
| H | 1.150693  | -2.788442 | -3.634961 |
| H | 0.941140  | -1.051093 | -3.320741 |
| H | 2.303400  | -1.611667 | -4.299105 |
| H | 2.393478  | 0.077060  | -1.616461 |
| H | -3.786791 | -2.286147 | 1.536475  |
| C | -3.318591 | -4.105329 | 0.532432  |
| C | -2.529705 | -4.689035 | -0.647319 |
| C | -2.754968 | -4.672665 | 1.843823  |
| C | -4.797731 | -4.500217 | 0.404343  |
| H | -2.890707 | -4.297999 | -1.600638 |

|   |            |           |           |
|---|------------|-----------|-----------|
| H | -1.456270  | -4.475696 | -0.575167 |
| H | -2.639791  | -5.780303 | -0.651354 |
| H | -3.292544  | -4.281348 | 2.716247  |
| H | -2.846281  | -5.764896 | 1.850790  |
| H | -1.693919  | -4.427698 | 1.964074  |
| H | -4.901761  | -5.590524 | 0.437709  |
| H | -5.398166  | -4.081007 | 1.221200  |
| H | -5.224937  | -4.156153 | -0.543759 |
| C | -3.947387  | -1.832925 | -0.548942 |
| O | -3.730218  | -2.086447 | -1.730139 |
| N | -4.819797  | -0.877183 | -0.148018 |
| H | -4.953183  | -0.733558 | 0.844427  |
| C | -5.628807  | -0.103160 | -1.072036 |
| H | -5.364441  | -0.484950 | -2.062271 |
| C | -7.103502  | -0.408814 | -0.821565 |
| C | -7.881075  | 0.372650  | 0.033762  |
| C | -7.672808  | -1.540672 | -1.410870 |
| C | -9.205576  | 0.029290  | 0.295370  |
| H | -7.454063  | 1.259546  | 0.493899  |
| C | -8.995973  | -1.884168 | -1.152319 |
| H | -7.070867  | -2.156796 | -2.074683 |
| C | -9.766858  | -1.098489 | -0.297341 |
| H | -9.800832  | 0.647967  | 0.961058  |
| H | -9.427100  | -2.764464 | -1.620684 |
| H | -10.801404 | -1.362355 | -0.097242 |
| C | -5.319026  | 1.385822  | -1.038159 |
| C | -5.817629  | 2.191962  | -2.066560 |
| C | -4.584558  | 1.978682  | -0.013303 |
| C | -5.592065  | 3.563696  | -2.069282 |

|   |           |           |           |
|---|-----------|-----------|-----------|
| H | -6.392759 | 1.737432  | -2.870062 |
| C | -4.366985 | 3.356059  | -0.009356 |
| H | -4.156488 | 1.367852  | 0.777227  |
| C | -4.866833 | 4.152893  | -1.033581 |
| H | -5.984221 | 4.174106  | -2.878003 |
| H | -3.795198 | 3.806053  | 0.796417  |
| H | -4.692242 | 5.225136  | -1.028506 |
| C | 1.513229  | -1.436285 | 3.578548  |
| C | 0.838944  | -2.813324 | 3.676132  |
| C | 2.793838  | -1.540502 | 2.748245  |
| C | 1.865709  | -0.977006 | 5.001781  |
| H | -0.128726 | -2.748358 | 4.188349  |
| H | 0.668616  | -3.258084 | 2.690121  |
| H | 1.475997  | -3.501257 | 4.243860  |
| H | 3.385586  | -0.622580 | 2.813319  |
| H | 3.426210  | -2.359893 | 3.109100  |
| H | 2.581355  | -1.723231 | 1.690667  |
| H | 2.582650  | -1.672800 | 5.452715  |
| H | 2.326585  | 0.017080  | 5.019239  |
| H | 0.975846  | -0.948257 | 5.642408  |
| C | 6.159261  | -0.957318 | 0.268876  |
| C | 5.367394  | -0.014816 | 0.941282  |
| C | 5.835847  | 0.592740  | 2.106339  |
| C | 7.096246  | 0.232131  | 2.573055  |
| C | 7.869056  | -0.721222 | 1.901540  |
| C | 7.406246  | -1.341677 | 0.740837  |
| H | 5.221613  | 1.317304  | 2.633862  |
| H | 7.483271  | 0.689948  | 3.479104  |
| H | 8.844852  | -0.993700 | 2.292024  |

|   |          |           |           |
|---|----------|-----------|-----------|
| H | 8.001148 | -2.085079 | 0.227240  |
| N | 5.374747 | -1.394688 | -0.833156 |
| N | 4.141946 | 0.127996  | 0.323367  |
| S | 6.123259 | -1.618246 | -2.356619 |
| O | 7.503420 | -1.979919 | -2.080659 |
| O | 5.308181 | -2.511146 | -3.157531 |
| C | 6.073124 | 0.016707  | -3.062366 |
| H | 5.027263 | 0.303640  | -3.188455 |
| H | 6.594342 | 0.700469  | -2.389339 |
| H | 6.580336 | -0.034203 | -4.028562 |

---

<sup>i</sup> A. D. Becke, Density-functional thermochemistry. V. Systematic optimization of exchange-correlation functionals. *J. Chem. Phys.* **107**, 8554–8560 (1997).

<sup>ii</sup> J.-D. Chai, M. Head-Gordon, Long-range corrected hybrid density functionals with damped atom–atom dispersion corrections. *Phys. Chem. Chem. Phys.* **10**, 6615–6620 (2008).

<sup>iii</sup> S. Grimme, Supramolecular binding thermodynamics by dispersion-corrected density functional theory. *Chem. Eur. J.* **18**, 9955–9964 (2012).

<sup>iv</sup> GoodVibes, version 2.0.1, I. Funes-Ardoiz, R. S. Paton, <http://doi.org/10.5281/zenodo.595246> (accessed 13 April 2018).

<sup>v</sup> S. Grimme, Supramolecular binding thermodynamics by dispersion-corrected density functional theory. *Chem. Eur. J.* **18**, 9955–9964 (2012).

<sup>vi</sup> GoodVibes, version 2.0.1, I. Funes-Ardoiz, R. S. Paton, <http://doi.org/10.5281/zenodo.595246> (accessed 13 April 2018).

<sup>vii</sup> E. Cancès, B. Mennucci, J. Tomasi, A new integral equation formalism for the polarizable continuum model: Theoretical background and applications to isotropic and anisotropic dielectrics. *J. Chem. Phys.* **107**, 3032–3041 (1997).

<sup>viii</sup> B. Mennucci, E. Cancès, J. Tomasi, Evaluation of solvent effects in isotropic and anisotropic dielectrics and in ionic solutions with a unified integral equation method: Theoretical bases, computational implementation, and numerical applications. *J. Phys. Chem. B* **101**, 10506–10517 (1997).

<sup>ix</sup> B. Mennucci, J. Tomasi, Continuum solvation models: A new approach to the problem of solute’s charge distribution and cavity boundaries. *J. Chem. Phys.* **106**, 5151–5158 (1997).

<sup>x</sup> J. Tomasi, B. Mennucci, E. Cancès, The IEF version of the PCM solvation method: an overview of a new method addressed to study molecular solutes at the QM ab initio level. *J. Mol. Struct. THEOCHEM* **464**, 211–226 (1999).

<sup>xi</sup> G. Scalmani, M. J. Frisch, Continuous surface charge polarizable continuum models of solvation. I. General formalism. *J. Chem. Phys.* **132**, 114110 (2010).

---

<sup>xii</sup> A. V. Marenich, C. J. Cramer, D. G. Truhlar, Universal solvation model based on solute electron density and on a continuum model of the solvent defined by the bulk dielectric constant and atomic surface tensions. *J. Phys. Chem. B* **113**, 6378–6396 (2009).

<sup>xiii</sup> Gaussian 09, Revision D.01, M. J. Frisch, G. W. Trucks, H. B. Schlegel, G. E. Scuseria, M. A. Robb, J. R. Cheeseman, G. Scalmani, V. Barone, G. A. Petersson, H. Nakatsuji, X. Li, M. Caricato, A. V. Marenich, J. Bloino, B. G. Janesko, R. Gomperts, B. Mennucci, H. P. Hratchian, J. V. Ortiz, A. F. Izmaylov, J. L. Sonnenberg, D. Williams-Young, F. Ding, F. Lipparini, F. Egidi, J. Goings, B. Peng, A. Petrone, T. Henderson, D. Ranasinghe, V. G. Zakrzewski, J. Gao, N. Rega, G. Zheng, W. Liang, M. Hada, M. Ehara, K. Toyota, R. Fukuda, J. Hasegawa, M. Ishida, T. Nakajima, Y. Honda, O. Kitao, H. Nakai, T. Vreven, K. Throssell, J. A. Montgomery, Jr., J. E. Peralta, F. Ogliaro, M. J. Bearpark, J. J. Heyd, E. N. Brothers, K. N. Kudin, V. N. Staroverov, T. A. Keith, R. Kobayashi, J. Normand, K. Raghavachari, A. P. Rendell, J. C. Burant, S. S. Iyengar, J. Tomasi, M. Cossi, J. M. Millam, M. Klene, C. Adamo, R. Cammi, J. W. Ochterski, R. L. Martin, K. Morokuma, O. Farkas, J. B. Foresman, D. J. Fox, Gaussian, Inc., Wallingford CT, 2009.
